# Supplementary material for: Comparative efficacy and acceptability of antiepileptic drugs for classical trigeminal neuralgia: a Bayesian network meta-analysis protocol
Source: PubMed Central journal article supplement (PMC5780694; doi:10.1136/bmjopen-2017-017392), 2018-01-21
Supplement: bmjopen-2017-017392.draft_revisions.pdf [file bmjopen-2017-017392.draft_revisions.pdf]

# BMJ Open

BMJ Open is committed to open peer review. As part of this commitment we make the peer review history of every article we publish publicly available.

When an article is published we post the peer reviewers' comments and the authors' responses online. We also post the versions of the paper that were used during peer review. These are the versions that the peer review comments apply to.

The versions of the paper that follow are the versions that were submitted during the peer review process. They are not the versions of record or the final published versions. They should not be cited or distributed as the published version of this manuscript.

BMJ Open is an open access journal and the full, final, typeset and author-corrected version of record of the manuscript is available on our site with no access controls, subscription charges or pay-per-view fees (<http://bmjopen.bmj.com>).

If you have any questions on BMJ Open's open peer review process please email [editorial.bmjopen@bmj.com](mailto:editorial.bmjopen@bmj.com)

# BMJ Open

## Comparative Efficacy and Acceptability of Antiepileptic Drugs for Classical Trigeminal Neuralgia: A Bayesian Network Meta-Analysis Protocol

|                                 |                                                                                                                                                                                                                                                                                                                                                                                                                                                                                                                                                                                                                                                                                                                                                                                                                                                                                                                                                                                                                                                                              |
|---------------------------------|------------------------------------------------------------------------------------------------------------------------------------------------------------------------------------------------------------------------------------------------------------------------------------------------------------------------------------------------------------------------------------------------------------------------------------------------------------------------------------------------------------------------------------------------------------------------------------------------------------------------------------------------------------------------------------------------------------------------------------------------------------------------------------------------------------------------------------------------------------------------------------------------------------------------------------------------------------------------------------------------------------------------------------------------------------------------------|
| Journal:                        | <i>BMJ Open</i>                                                                                                                                                                                                                                                                                                                                                                                                                                                                                                                                                                                                                                                                                                                                                                                                                                                                                                                                                                                                                                                              |
| Manuscript ID                   | bmjopen-2017-017392                                                                                                                                                                                                                                                                                                                                                                                                                                                                                                                                                                                                                                                                                                                                                                                                                                                                                                                                                                                                                                                          |
| Article Type:                   | Protocol                                                                                                                                                                                                                                                                                                                                                                                                                                                                                                                                                                                                                                                                                                                                                                                                                                                                                                                                                                                                                                                                     |
| Date Submitted by the Author:   | 20-Apr-2017                                                                                                                                                                                                                                                                                                                                                                                                                                                                                                                                                                                                                                                                                                                                                                                                                                                                                                                                                                                                                                                                  |
| Complete List of Authors:       | <p>Qin, Zongshi; Guang'anmen Hospital, China Academy of Chinese Medical Sciences, Department of Acupuncture and Neurology</p> <p>Xie, Shang; Peking University School and Hospital of Stomatology, Department of Oral and Maxillofacial Surgery</p> <p>Mao, Zhi; Chinese People's Liberation Army General Hospital, Department of Critical Care Medicine</p> <p>Liu, Yan; China Academy of Chinese Medical Sciences, Data Centre of Traditional Chinese Medicine</p> <p>WU, Jiani; Guang'anmen Hospital, China Academy of Chinese Medical Sciences, Department of Acupuncture and Neurology</p> <p>Furukawa, Toshi; Kyoto University, Graduate School of Medicine and School of Public Health</p> <p>Kwong, Joey; Taipei Medical University, Cochrane Taiwan; National Center for Child Health and Development, Department of Health Policy &amp; Department of Clinical Epidemiology</p> <p>Tian, Jinhui; Evidence based medicine center,</p> <p>Liu, Zhishun; Guang'anmen Hospital, China Academy of Chinese Medical Sciences, Department of Acupuncture and Neurology</p> |
| <b>Primary Subject Heading</b>: | Evidence based practice                                                                                                                                                                                                                                                                                                                                                                                                                                                                                                                                                                                                                                                                                                                                                                                                                                                                                                                                                                                                                                                      |
| Secondary Subject Heading:      | Neurology                                                                                                                                                                                                                                                                                                                                                                                                                                                                                                                                                                                                                                                                                                                                                                                                                                                                                                                                                                                                                                                                    |
| Keywords:                       | antiepileptic drugs, trigeminal neuralgia, network meta-analysis, systematic review, protocol                                                                                                                                                                                                                                                                                                                                                                                                                                                                                                                                                                                                                                                                                                                                                                                                                                                                                                                                                                                |
|                                 |                                                                                                                                                                                                                                                                                                                                                                                                                                                                                                                                                                                                                                                                                                                                                                                                                                                                                                                                                                                                                                                                              |

SCHOLARONE™  
Manuscripts

1  
2  
3 **Comparative Efficacy and Acceptability of Antiepileptic Drugs for Classical**  
4 **Trigeminal Neuralgia: A Bayesian Network Meta-Analysis Protocol**  
5  
6  
7

8  
9 Zongshi Qin,<sup>1</sup> Shang Xie<sup>2</sup>, Zhi Mao<sup>3</sup>, Yan Liu<sup>4</sup>, Jiani Wu<sup>1</sup>, Toshi A Furukawa<sup>5</sup>, Joey S.W.  
10 Kwong<sup>6,7</sup>, Jinhui Tian<sup>8</sup>, Zhishun Liu<sup>1</sup>

11  
12 <sup>1</sup> Department of Acupuncture and Neurology, Guang'anmen Hospital, China Academy of Chinese  
13 Medical Sciences, Beijing, China  
14

15  
16 <sup>2</sup> Department of Oral and Maxillofacial Surgery, Peking University School and Hospital of  
17 Stomatology, Beijing, China  
18

19  
20 <sup>3</sup> Department of Critical Care Medicine, Chinese People's Liberation Army General Hospital,  
21 Beijing, China  
22

23  
24 <sup>4</sup> Data Centre of Traditional Chinese Medicine, China Academy of Chinese Medical Sciences,  
25 Beijing, China  
26

27  
28 <sup>5</sup> Department of Health Promotion and Human Behavior, Kyoto University Graduate School of  
29 Medicine/School of Public Health, Kyoto, Japan  
30

31  
32 <sup>6</sup> Cochrane Taiwan, Taipei Medical University, Taipei, Taiwan  
33

34  
35 <sup>7</sup> Department of Health Policy & Department of Clinical Epidemiology, National Center for Child  
36 Health and Development, Tokyo, Japan  
37

38  
39 <sup>8</sup> Evidence-based Medicine Center, Lanzhou University, Lanzhou, China

40 ZQ, SX and ZM contributed equally to this work.

41 Correspondence to: Jinhui Tian, email: tianjh@lzu.edu.cn; Zhishun Liu, email:

42 liuzhishun@aliyun.com  
43

44  
45 Keywords: antiepileptic drugs; trigeminal neuralgia; network meta-analysis; systematic review;  
46 protocol  
47  
48  
49  
50  
51  
52  
53  
54  
55  
56  
57  
58  
59  
60

## ABSTRACT

**Introduction** As the most common neuralgia, trigeminal neuralgia (TN) affects 4 to 28.9/100,000 people worldwide, and antiepileptic drugs such as carbamazepine and oxcarbazepine are the first-line treatment options. However, the efficacy and safety of other antiepileptic drugs remain unclear due to insufficient direct comparisons.

**Objective** To compare the efficacy and acceptability of all currently available antiepileptic agents for the treatment of patients with classical TN.

**Methods** We will search the PubMed, EMBASE, Cochrane Library, and Web of Science databases for unpublished or undergoing research listed in registry platforms. We will include all randomized controlled trials comparing two different antiepileptic drugs or one antiepileptic drug with placebo in patients with classic TN. The primary outcomes will be the proportion of responders and the number of subjects who drop out during the treatment. The secondary outcomes include the two primary outcomes but set in the follow-up period, changes in the self-reporting assessment scale for neuralgia, and quality of life assessment. In terms of network meta-analysis, we will fit our model in a Bayesian framework using WinBUGS (Medical Research Council's Biostatistics Unit, Cambridge, UK). To confirm the results, we will also conduct analyses using STATA (Version 13.0; Stata Corporation, College Station, Texas, USA) and compare the differences between the two platforms.

**Ethics and dissemination** This protocol will not disseminate any private patient data.

**Protocol registration for this systematic review (registration number):** PROSPERO (CRD: 42016048640).

### Strengths and limitations of this study

- To the best of the authors' knowledge, this study will be the first network meta-analysis that assess the comparative efficacy and acceptability of all the available antiepileptic drugs for the classical trigeminal neuralgia.
- This study will be performed by Bayesian framework, which enables us to estimate the probability for each intervention to be the best for each outcome.
- Owing to the language barrier, the amount of included trials might be potentially limited.

## Introduction

Classical trigeminal neuralgia (TN), a chronic pain disorder described as one of the most severe pains one can suffer, is characterized by paroxysms of unilateral, electric shock-like, and severe pain along the trigeminal nerve divisions.<sup>1,2</sup> It affects lifestyle because it can be triggered by common activities such as eating, talking, shaving and brushing teeth. The wind, chewing and talking also aggravate the condition in many patients.<sup>2</sup> As the most common neuralgia, it is estimated that approximately 4 to 28.9 per 100,000 people worldwide suffer from TN, and the number affected tends to be higher among women at all ages and even increases with age.<sup>3,4</sup>

At present, the cause of TN remains unclear.<sup>5,6</sup> One of the most common hypotheses is that the trigeminal nerve becomes compressed at the root entry zone by cerebral vessels.<sup>7</sup> Owing to the contradictory etiology and poorly understood pathophysiological mechanisms underlying TN, a variety of therapeutic and surgical approaches have been developed to alleviate the associated pain and improve the quality of life in patients with classical TN.<sup>8-10</sup> Although many patients have obtained excellent outcomes from surgery, many others do not experience any pain relief.<sup>11,12</sup> Furthermore, the currently available surgical procedures are associated with various complications, particularly sensory loss in the trigeminal nerve territory, anesthesia dolorosa and, rarely, ipsilateral hearing loss, depending on the technique.<sup>13-15</sup>

As such, pharmacological measures to improve clinical outcomes are needed. The most commonly used option is antiepileptic drugs, with phenytoin being the first drug used for classical TN with positive effect.<sup>16</sup> Carbamazepine can reduce both the frequency and intensity of painful paroxysms and was first introduced by the US Food and Drug Administration (FDA); however, its efficacy is compromised by poor tolerability.<sup>17,18</sup> Oxcarbazepine, a derivative of carbamazepine, is often used as an initial treatment for classical TN and has more favorable properties than carbamazepine related to its increased efficacy in epilepsy, greater tolerability and decreased potential for drug interactions.<sup>17,18</sup> Lamotrigine has also been reported as an effective add-on therapy,<sup>19</sup> whereas little evidence supports that other antiepileptic drugs such as clonazepam, gabapentin, pregabalin and valproate have a beneficial effect.<sup>20-23</sup>

To date, several systematic reviews have investigated the comparative efficacy and safety of antiepileptic drugs.<sup>21,24-28</sup> However, previous systematic reviews have only considered pair-wise evidence from head-to-head comparisons and have thus failed to assess the comparative efficacy

1  
2  
3 and acceptability of all available antiepileptic drugs. Thus, it is difficult to determine the best  
4  
5 treatments for relieving pain with minimal adverse effects. In the present study, we will apply  
6  
7 network meta-analysis to integrate direct and indirect comparisons,<sup>29,30</sup> which could be used not  
8  
9 only to strengthen inferences concerning the efficacy and acceptability of treatments but also to  
10  
11 rank the efficacy and acceptability of antiepileptic drugs accordingly.<sup>31</sup>

12  
13 The objectives of this systematic review and network meta-analysis are 1) to compare all currently  
14  
15 available antiepileptic drugs in terms of efficacy and acceptability in classical TN treatment and 2)  
16  
17 to determine which drug achieves the best balance between efficacy and adverse effects. The  
18  
19 results of this study will augment findings based on current pair-wise meta-analyses and are  
20  
21 expected to provide important information to support clinical practice and health policy decisions.  
22

## 23 24 **METHODS**

25  
26 This protocol will be conducted in accordance with the reporting guidance provided in the  
27  
28 Preferred Reporting Items for Systematic Reviews and Meta-Analysis Protocols (PRISMA-P)  
29  
30 statement and Checklist of Items to Include When Reporting a Systematic Review Involving a  
31  
32 Network Meta-analysis.<sup>32,33</sup> The protocol is registered in PROSPERO (CRD: 42016048640). This  
33  
34 study will not involve any private patient data, ethical approval was waived. (supplemental file 1  
35  
36 represents the PRISMA-P checklist)

### 37 38 39 **Eligibility criteria**

#### 40 41 **Study types**

42  
43 We will include randomized controlled trials (RCTs) comparing one antiepileptic drug with  
44  
45 another antiepileptic drug as monotherapy or placebo for the treatment of TN. Quasi-randomized  
46  
47 controlled trails allocating participants according to birth date or the consequences of enrollment  
48  
49 will be excluded. The minimum duration for RCT inclusion was set at 4 weeks. Trials with more  
50  
51 than a two-arm design will be considered only if the available data meet the criteria for an  
52  
53 intervention. For trials with a crossover design, data will only be extracted from the first  
54  
55 randomization period.

#### 56 57 58 **Participant characteristics**

1  
2  
3  
4  
5  
6  
7  
8  
9  
10  
11  
12  
13  
14  
15  
16  
17  
18  
19  
20  
21  
22  
23  
24  
25  
26  
27  
28  
29  
30  
31  
32  
33  
34  
35  
36  
37  
38  
39  
40  
41  
42  
43  
44  
45  
46  
47  
48  
49  
50  
51  
52  
53  
54  
55  
56  
57  
58  
59  
60

Only trials that enrolled participants with a diagnosis of classical TN according to standardized criteria such as the classification of the International Headache Society (IHS) of International Classification of Headache Disorders will be sought.<sup>1,34</sup> For studies using other extensive criteria for the diagnosis of classical TN, detailed diagnostic criteria must be reported (such as history or characteristics that have been confirmed by CT or MRI).<sup>35</sup> Studies examining symptomatic TN patients will not be included. Participants with comorbid conditions such as anxiety, depression, epilepsy or other medical conditions will also not be eligible for inclusion. No limitations will be imposed for age, sex, or nationality.

#### Intervention types

We plan to include the following antiepileptic drugs: carbamazepine, lamotrigine, clonazepam, phenytoin, valproate, gabapentin, pregabalin, oxcarbazepine and topiramate. In addition to these antiepileptic drugs, we will also obtain information about interventions of interest from either pair-wise RCTs or placebo-controlled trials, as some RCTs design a placebo-controlled arm as the comparator. Figure 1 illustrates the network plot of all possible direct comparisons between the eligible interventions.

#### Outcome measures

Studies reporting one of the following will be included.

##### Primary outcome

The primary objective of this review is to assess the efficacy and acceptability of antiepileptic drugs for classical TN; therefore, the following two outcomes will be used as the primary outcome.

1. The proportion of responders to a self-reporting assessment scale for neuralgia. A responder was defined as a subject who obtained a  $\geq 50\%$  pain reduction score from baseline to endpoint (4–12 weeks) or a subject who obtained a pain reducing score of no less than the minimal clinically important difference (MCID). Pain scores will be extracted based on the visual analogue score (VAS), numerical rating score (NRS), or any other validated scale for the assessment of overall TN symptoms when available.<sup>36</sup>
2. The proportion of participants who drop out from a study from baseline to endpoint (4–12

1  
2  
3 weeks) due to adverse events, defined as events resulting from any factor during treatment.  
4  
5  
6

#### 7 8 Secondary outcomes

- 9  
10 1. The proportion of responders with  $\geq 50\%$  pain reduction on a self-reporting assessment scale  
11 for neuralgia from baseline to endpoint after follow-up.  
12  
13 2. The change in pain symptoms of TN from baseline to endpoint (4–12 weeks) measured based  
14 on the VAS, NRS, or any other validated scale for the assessment of overall TN symptoms when  
15 available.  
16  
17 3. The change in pain symptoms of TN from baseline to endpoint after follow-up.  
18  
19 4. The quality of life based on measurement with a validated scale, such as the Short Form 36  
20 Health Survey questionnaire (SF-36).<sup>37</sup>  
21  
22  
23  
24  
25

#### 26 27 Search strategy

28 We will identify RCTs through a comprehensive, systematic literature search primarily utilizing  
29 the PubMed, EMBASE, Cochrane Library, and Web of Science databases. As publication bias  
30 caused by insufficient unpublished data can significantly bias the comparative efficacy results of  
31 network meta-analysis and modify rankings, we will also perform searches for unpublished or  
32 ongoing trials using System for information on Grey Literature in Europe (SIGLE) as well as  
33 other registry platforms, such as Clinicaltrials.gov and the International Clinical Trials Registry  
34 Platform. Prior to completing this review, we will perform an additional search of each database  
35 and registration platform to guarantee that the most recent studies are included. We will use  
36 medical subject headings and text words related to ‘trigeminal neuralgia’ and ‘randomized  
37 controlled trial’ for the literature search. In addition, the reference lists of previous systematic  
38 reviews will be examined to ensure the quantity and accuracy of the included studies. The search  
39 strategy will be developed by JT and ZL. (supplemental file 2 represents the search strategies for  
40 PubMed, EMBASE and Cochrane Library)  
41  
42  
43  
44  
45  
46  
47  
48  
49  
50  
51  
52  
53

#### 54 55 Data collection process

56 Two authors (SX and ZM) will scan the titles and abstracts of the trials after duplicated records  
57 have been excluded using EndNote X7 (Thomson Reuters, New York, NY). The scanning will be  
58  
59  
60



1  
2  
3 performed using EndNote, and all trials will be allocated to the following five groups: inclusion  
4 group, non-patient group, intervention group, outcome group, and awaiting group. A prior data  
5 collection process will be conducted using an electro-table created with Excel software, which has  
6 been used in our previous study.<sup>38</sup> The table will consist of four sheets, including general  
7 information (author list, publication year, and journal), characteristics of included trials  
8 (diagnostic criteria, age range, study drugs, and dose range), the risk of bias assessed using the  
9 Cochrane risk of bias tool, and outcome data extraction (number of participants who responded to  
10 treatment and the number who dropped out during the treatment). All original data will be  
11 submitted as an attachment. A flow chart illustrating this design is presented in Figure 2.  
12  
13  
14  
15  
16  
17  
18  
19

### 20 21 22 **Quality assessment**

23  
24 Two authors (JW and YL) will use the Cochrane risk of bias tool to assess the risk of bias of  
25 eligible studies, covering randomization, concealment allocation, blinding and other biases.<sup>39</sup> As  
26 inadequate concealment could potentially fail the randomization test, two independent review  
27 authors will pay particular attention to the adequacy of random allocation concealment and  
28 blinding. The other sources of bias will be assessed while considering sample size calculation  
29 method, diagnostic criteria, reporting of withdrawals and follow-up. Two authors (JK and JT) will  
30 assess the quality of evidence using Grading of Recommendations Assessment, Development and  
31 Evaluation (GRADE) framework, covering study limitations, inconsistency, indirectness,  
32 imprecision and publication bias.<sup>40</sup> The methods for rating the quality of direct comparisons are  
33 the same to the methods used in traditional meta-analysis, and following steps will be used in the  
34 whole assessment procedure: 1) presenting direct and indirect effect estimates; 2) rating the  
35 quality of direct and indirect estimates; 3) presenting the results of network meta-analysis; 4)  
36 rating the quality of network meta-analysis effect estimates.  
37  
38  
39  
40  
41  
42  
43  
44  
45  
46  
47  
48  
49

### 50 51 **Dealing with missing data**

52 To obtain missing data, we will initially contact the senior or corresponding author. If no one  
53 responds, we will estimate the missing data as follows. For studies failing to report the number of  
54 responding patients after treatment, instead of providing the mean and standard deviation, we will  
55 calculate the number of responding patients employing a validated imputation method.<sup>41</sup> In  
56  
57  
58  
59  
60

1  
2  
3  
4  
5  
6  
7  
8  
9  
10  
11  
12  
13  
14  
15  
16  
17  
18  
19  
20  
21  
22  
23  
24  
25  
26  
27  
28  
29  
30  
31  
32  
33  
34  
35  
36  
37  
38  
39  
40  
41  
42  
43  
44  
45  
46  
47  
48  
49  
50  
51  
52  
53  
54  
55  
56  
57  
58  
59  
60

addition, we will also estimate missing data from graphs when possible. For trials that cannot be extracted or estimated, the available data will be excluded, and the reason for exclusion will be reported.

### Statistical analysis

The method used for data synthesis will be based on mixed treatment meta-analysis. To examine comparisons, we will use STATA (Version 13.0; Stata Corporation, College Station, Texas, USA) to synthesize data and will present the comparison results if the included studies are sufficient for each pair-wise comparison. We will use a random effects model to combine the data, and the outcomes of continuous and binary variables will be presented as standardized mean differences (SMDs) and odds ratios (ORs) with 95% confidential intervals (CIs). For indirect comparisons, a random effects model network meta-analysis will be developed in a Bayesian framework using Markov chain Monte Carlo simulation methods in WinBUGS (Medical Research Council's Biostatistics Unit, Cambridge, UK). This will enable us to estimate the best probability for each intervention for each positive outcome, given the results of the multiple-treatment meta-analysis. At least one network focusing on the response rate for pain relief will be constructed, in which a statistically significant difference defined as the null value will not be included in the 95% CI. The Markov chains will be utilized for 50,000 simultaneous iterations based on the data and the description of the proposed distributions for relevant parameters, and the first 10,000 iterations will be discarded to avoid potential impact on the arbitrary value. For continuous outcomes and binary outcomes, the OR and SMD will be presented with the 95% credible interval (CrI). In this process, the Brooks-Gelman-Rubin method will be used to assess the convergence between direct and indirect variances. According to the theory of Brooks and Gelman, if a potential scale reduction factor (PSRF) is less than 1.2, then an approximate convergence has occurred. The PSRF results will be presented graphically using a Brooks-Gelman-Rubin diagnosis plot, if needed. To describe relationships among different treatments, a network plot will be created to show direct comparisons between arms based on different outcomes. To confirm the results, we will also conduct the same network meta-analysis using the network package of STATA ([http://www.mrc-bsu.cam.ac.uk/IW\\_Stata/](http://www.mrc-bsu.cam.ac.uk/IW_Stata/)), and the outcome will be compared to that produced using WinBUGS. In addition, the effectiveness of each treatment among all available treatments

1  
2  
3 will be ranked by calculating the OR in order, and plots of the surfaces under the cumulative  
4 ranking curves (SUCRAs) will be generated to rank the various treatments for each outcome.<sup>42</sup> We  
5 will also present a cluster rank table to synthesize the efficacy and acceptability of each drug  
6 (using two primary outcomes). The table will consist of two triangles: the upper right triangle will  
7 illustrate the acceptability, and the lower left triangle will illustrate the efficacy.<sup>31</sup>  
8  
9

#### 10 11 12 13 **Assessment of heterogeneity**

14 Heterogeneity, which plays a pivotal role in both standard meta-analysis and network  
15 meta-analysis, refers to the degree of disagreement between study-specific treatment effects and  
16 constitutes the basis of inconsistency. To test the heterogeneity of each pair-wise comparison, we  
17 will use the  $I^2$  statistic.<sup>43</sup>  
18  
19

#### 20 21 22 23 **Assessment of transitivity and similarity**

24 In addition to the heterogeneity assessment using the  $I^2$  statistic, the assumption of transitivity and  
25 similarity based on clinical and methodological characteristics will be assessed. It should be noted  
26 that it is difficult to identify these effect modifiers using statistical analysis. We will assume that  
27 intervention effects are transitive in this network meta-analysis because we will only focus on  
28 antiepileptic drugs, and we will investigate similarity based on clinical characteristics, such as  
29 antiepileptic drug dose, period of treatment, and severity of pain symptoms at baseline, as well as  
30 according to methodological characteristics such as study quality.<sup>44</sup> All these effect modifiers will  
31 be judged and reported before the network meta-analysis is conducted.  
32  
33  
34  
35  
36  
37  
38  
39  
40  
41  
42

#### 43 44 **Assessment of inconsistency**

45 The evaluation and explanation of inconsistency is another basic objective of network  
46 meta-analysis. In this context, inconsistency refers to the degree of difference between direct and  
47 indirect comparisons and can be evaluated only when a loop exists in the evidence network. This  
48 means that inconsistency assessment using a design-by-treatment interaction model cannot be  
49 conducted if the structure of this network is a “star network” (i.e., all interventions have a single  
50 mutual comparator, such as a placebo).<sup>45,46</sup> For such cases, we will test inconsistency using a  
51 node-splitting model.<sup>47</sup>  
52  
53  
54  
55  
56  
57

58 To identify inconsistency among the included trials of the network, we will use STATA,  
59  
60

1  
2  
3 performing the Z test to compare direct and indirect summary effects in specific loops.<sup>48</sup> If there is  
4 no inconsistency between loops or designs, we will use a consistency model to calculate the data.  
5  
6 For cases of significant incoherence, we will initially look for data extraction errors in loops that  
7 present inconsistency and in comparisons with large heterogeneity.<sup>49</sup> After the data have been  
8 scrutinized, we will investigate possible sources of inconsistency within clinical and  
9 methodological variables suspected of being potential sources of either heterogeneity or  
10 incoherence in each comparison-specific group of trials. If an important inconsistency cannot be  
11 explained, we will consider avoiding synthesis of the related network.  
12  
13  
14  
15  
16  
17  
18  
19

### 20 **Additional analyses**

21 To ensure the quality of this review, studies not reporting blinding will be excluded prior to data  
22 synthesis because blinding plays a vital important role in the randomized controlled trial. We will  
23 assess heterogeneity quantitatively using the I<sup>2</sup> statistic, and if an I<sup>2</sup> value is greater than 50%, then  
24 we will explore the source of heterogeneity. We will initially perform sensitivity analysis by  
25 excluding trials rated as having a high risk of bias. Additionally, meta-regression or subgroup  
26 analysis will be used to explore possible sources of heterogeneity if the number of included trials  
27 is sufficient. For network meta-regression, we will use a random effects network meta-regression  
28 model to examine potential factors.  
29  
30  
31  
32  
33  
34  
35  
36  
37  
38

### 39 **Discussion**

40 To the best of our knowledge, no network meta-analyses comparing the use of antiepileptic drugs  
41 for treatment of classical TN have been conducted to date. Previous systematic reviews have  
42 compared only a single drug to other types of drug or therapy.<sup>21,24-28</sup> This makes it difficult to  
43 obtain a clear understanding of the effectiveness of the various different conservative treatments  
44 for this disorder. Network meta-analysis can be used to perform indirect comparisons and allows  
45 parameters for direct and indirect comparisons to be synthesized. To ensure the quantity and  
46 quality of the potentially included RCTs, we will perform an extensive literature search and  
47 predefine rigorous inclusion criteria. Besides, we will assess the quality of evidence with the  
48 GRADE framework. Although a ranking of the included interventions will be generated, with the  
49 exception of findings, the quality of evidence should also be considered. We hope that the results  
50  
51  
52  
53  
54  
55  
56  
57  
58  
59  
60

1  
2  
3  
4  
5  
6  
7  
8  
9  
10  
11  
12  
13  
14  
15  
16  
17  
18  
19  
20  
21  
22  
23  
24  
25  
26  
27  
28  
29  
30  
31  
32  
33  
34  
35  
36  
37  
38  
39  
40  
41  
42  
43  
44  
45  
46  
47  
48  
49  
50  
51  
52  
53  
54  
55  
56  
57  
58  
59  
60

of this review help clinicians make more accurate treatment decisions and promote additional research into conservative treatments for classical TN.

For peer review only

**Amendments**

If it is necessary to update this protocol, we will update this protocol in the future. We will submit the original protocol, final protocol and summary of changes as a supplement.

**Authors' contributions**

ZQ, SX, and ZM conceived of the study. JT and SX developed the search strategies. ZQ, JT and SX wrote the first draft. TAF and ZL revised the draft. SX and ZM will independently screen potential studies and extract data from the included studies. JW, JK, JT and YL will assess the risk of bias and summarize the evidence. ZM, SX, JK and ZL will address the missing data, if any. ZQ and JT will perform the statistical analysis. ZL and JT will arbitrate in cases of disagreement and ensure the absence of errors. All authors approve the publication of this protocol.

**Ethics and dissemination**

This protocol will not disseminate any private patient data. The results of this review will be disseminated through peer-reviewed publication.

**Competing interests:** None.

**Funding:** None.

## Reference

1. Headache Classification Committee of the International Headache Society (IHS). The International Classification of Headache Disorders, 3rd edition (beta version). *Cephalalgia*. 2013;33:629-808.
2. Nurmikko TJ. Trigeminal neuralgia-pathophysiology, diagnosis and current treatment. *British Journal of Anaesthesia*. 2001;87:117-132.
3. Meller D, Obermann M, Yoon MS, Poitz F, Hansen N, Slomke MA. Prevalence of trigeminal neuralgia and persistent idiopathic facial pain: a population-based study. *Cephalalgia*. 2011;31:1542-1548.
4. MacDonald BK, Cockerell OC, Sander JW, Shorvon SD. The incidence and lifetime prevalence of neurological disorders in a prospective community-based study in the UK. *Brain*. 2000;123:665-676.
5. Devor M, Amir R, Rappaport ZH. Pathophysiology of trigeminal neuralgia: the ignition hypothesis. *Clin J Pain*. 2002;18:4-13.
6. Danielle DD, Hodaie M, Davis KD. Structural magnetic resonance imaging can identify trigeminal system abnormalities in classical trigeminal neuralgia. *Front Neuroanat*. 2016;10:95.
7. Katusic S, Beard CM, Bergstralh E, Kurland LT. Incidence and clinical features of trigeminal neuralgia, Rochester, Minnesota, 1945-1984. *Ann Neurol*. 1990;27:89-95.
8. Gronseth G, Cruccu G, Alksne J, et al. Practice parameter: the diagnostic evaluation and treatment of trigeminal neuralgia (an evidence-based review): report of the Quality Standards Subcommittee of the American Academy of Neurology and the European Federation of Neurological Societies. *Neurology*. 2008;71:1183-1190.
9. Campbell FG, Graham JG, Zilkha KJ. Clinical trial of carbamazepine (tegretol) in trigeminal neuralgia. *J Neurol Neurosurg Psychiatry*. 1966;29:265-267.
10. Fromm GH, Terrence CF, Chattha AS. Baclofen in the treatment of trigeminal neuralgia: double-blind study and long-term follow-up. *Ann Neurol*. 1984;15:240-244.
11. Zakrzewska JM, Lopez BC, Kim SE, Coakham HB. Patient reports of satisfaction after microvascular decompression and partial sensory rhizotomy for trigeminal neuralgia. *Neurosurgery*. 2005;56:1304-1311.
12. A Nanda, V Javalkar, S Zhang, O Ahmed. Long term efficacy and patient satisfaction of microvascular decompression and gamma knife radiosurgery for trigeminal neuralgia. *Journal of Clinical Neuroscience* 2015;22:818-822.
13. Linskey ME, Ratanatharathorn V, Peñagaricano J. A prospective cohort study of microvascular decompression and Gamma Knife surgery in patients with trigeminal. *J Neurosurg*. 2008;109 Suppl:160-172.
14. Gronseth G, Cruccu G, Alksne J, et al. Practice parameter: the diagnostic evaluation and treatment of trigeminal neuralgia (an evidence-based review): report of the Quality Standards Subcommittee of the American Academy of Neurology and the European Federation of

- 1  
2  
3 Neurological Societies. *Neurology*. 2008;71:1183-1190.
- 4 15. Zakrzewska JM, Thomas DG. Patient's assessment of outcome after three surgical procedures  
5 for the management of trigeminal neuralgia. *Acta Neurochir (Wien)*. 1993;122:225-230.
- 6 16. Sindrup SH, Jensen TS.. Pharmacotherapy of trigeminal neuralgia. *Clin J Pain* 2002;18:22-27.
- 7 17. Wiffen PJ, McQuay HJ, Moore RA. Carbamazepine for acute and chronic pain. *Cochrane*  
8 *Database Syst Rev*. 2005;(3):CD005451.
- 9 18. Cruccu G, Gronseth G, Alksne J, et al. AAN-EFNS guidelines on trigeminal neuralgia  
10 management. *Eur J Neurol*. 2008;15:1013-1028.
- 11 19. Zakrzewska JM, Chaudhry Z, Nurmikko TJ, et al. Lamotrigine (Lamictal) in refractory  
12 trigeminal neuralgia: results from a double-blind placebo controlled crossover trial. *Pain*.  
13 1997;73:223-230.
- 14 20. Court JE, Kase CS. Treatment of tic douloureux with a new anticonvulsant (clonazepam). *J*  
15 *Neurol Neurosurg Psychiatry*. 1976;39:297-299.
- 16 21. Yuan M, Zhou HY, Xiao ZL, et al. Efficacy and Safety of Gabapentin vs. Carbamazepine in  
17 the Treatment of Trigeminal Neuralgia: A Meta-Analysis. *Pain Pract*. 2016;16:1083-1091
- 18 22. Obermann M, Yoon MS, Sensen K, Maschke M, Diener HC, Katsarava Z. Efficacy of  
19 pregabalin in the treatment of trigeminal neuralgia. *Cephalalgia*. 2008;28:174-181.
- 20 23. Peiris JB, Perera GL, Devendra SV, Lionel ND. Sodium valproate in trigeminal neuralgia.  
21 *Med J Aust*. 1980;2:278.
- 22 24. McQuay H, Carroll D, Jadad AR, et al. Anticonvulsant drugs for management of pain: a  
23 systematic review. *BMJ*. 1995;311:1047-1052.
- 24 25. Wiffen PJ, Rees J. Lamotrigine for acute and chronic pain. *Cochrane Database Syst Rev*.  
25 2007;(2):CD006044.
- 26 26. Wiffen PJ, McQuay HJ, Rees J, Moore RA. Gabapentin for acute and chronic pain. *Cochrane*  
27 *Database Syst Rev*. 2005;(3):CD005452.
- 28 27. Wiffen PJ, Derry S, Moore RA, McQuay HJ. Carbamazepine for acute and chronic pain in  
29 adults. *Cochrane Database Syst Rev*. 2011;(1):CD005451.
- 30 28. Moore RA, Straube S, Wiffen PJ, Derry S, McQuay HJ. Pregabalin for acute and chronic pain  
31 in adults. *Cochrane Database Syst Rev*. 2009;(3):CD007076.
- 32 29. Caldwell DM, Ades AE, Higgins JP. Simultaneous comparison of multiple treatments:  
33 combining direct and indirect evidence. *BMJ*. 2005;331:897-900.
- 34 30. Cipriani A, Higgins JP, Geddes JR, Salanti G. Conceptual and technical challenges in network  
35 meta-analysis. *Ann Intern Med*. 2013;159:130-137.
- 36 31. Cipriani A, Furukawa TA, Salanti G, et al. Comparative efficacy and acceptability of 12  
37 new-generation antidepressants: a multiple-treatments meta-analysis. *Lancet*. 2009;373:746-758.
- 38 32. Shamseer L, Moher D, Clarke M, et al. Preferred reporting items for systematic review and  
39 meta-analysis protocols (PRISMA-P) 2015: elaboration and explanation. *BMJ*. 2015;349:g7647.
- 40 33. Hutton B, Salanti G, Caldwell DM, et al. The PRISMA Extension Statement for Reporting of
- 41  
42  
43  
44  
45  
46  
47  
48  
49  
50  
51  
52  
53  
54  
55  
56  
57  
58  
59  
60



- 1  
2  
3 Systematic Reviews Incorporating Network Meta-analyses of Health Care Interventions: Checklist  
4 and Explanations. *Ann Intern Med.* 2015;162:777-784.  
5  
6 34. Merskey H, Bogduk N. Classification of chronic pain. Descriptions of chronic pain syndromes  
7 and definitions of pain terms, IASP Press, Seattle 1994, pp. 59-71.  
8  
9 35. Zakrzewska JM. Diagnosis and differential diagnosis of trigeminal neuralgia. *Clin J Pain.*  
10 2002;18:14-21.  
11  
12 36. Dworkin RH, Turk DC, Farrar JT, et al. Core outcome measures for chronic pain clinical trials:  
13 IMMPACT recommendations. *Pain.* 2005;113:9-19.  
14  
15 37. Ware JE Jr, Sherbourne CD. The MOS 36-item short-form health survey (SF-36). I.  
16 Conceptual framework and item selection. *Med Care.* 1992;30:473-483.  
17  
18 38. Qin Z, Li B, Wu J, et al. Acupuncture for chronic diarrhea in adults: protocol for a systematic  
19 review. *Medicine (Baltimore).* 2017;94:e5952.  
20  
21 39. Higgins JPT, Altman DG, Sterne JAC (editors). Chapter 8: Assessing risk of bias in included  
22 studies. In: Higgins JPT, Green S(editors). *Cochrane Handbook for Systematic Reviews of*  
23 *Intervention Version 5.1.0 [updated March 2011].* The Cochrane Collaboration, 2011. Available  
24 from [www.cochrane-handbook.org](http://www.cochrane-handbook.org).  
25  
26 40. Salanti G, Del Giovane C, Chaimani A, et al. Evaluating the quality of evidence from a  
27 network meta-analysis. *PLoS ONE.* 2014;9:e99682.  
28  
29 41. Furukawa TA, Cipriani A, Barbui C, Brambilla P, Watanabe N. Imputing response rates from  
30 means and standard deviations in meta-analyses. *Int Clin Psychopharmacol.* 2005;20:49-52.  
31  
32 42. Chaimani A, Higgins JPT, Mavridis D, Spyridonos P, Salanti G. Graphical tools for network  
33 meta-analysis in STATA. *PLoS One.* 2013;8:e76654.  
34  
35 43. Higgins JP, Thompson SG, Deeks JJ, Altman DG. Measuring inconsistency in meta-analyses.  
36 *BMJ.* 2003;327:557-560.  
37  
38 44. Baker SG, Kramer BS. The transitive fallacy for randomized trials: if A bests B and B bests C  
39 in separate trials, is A better than C? *BMC Med Res Methodol.* 2002;2:13.  
40  
41 45. White IR, Barrett JK, Jackson D, et al. Consistency and inconsistency in network  
42 meta-analysis: model estimation using multivariate meta-regression. *Res Synth Methods.*  
43 2012;3:111-125  
44  
45 46. Higgins JPT, Jackson D, Barrett JL, et al. Consistency and inconsistency in network  
46 meta-analysis: concepts and models for multi-arm studies. *Res Synth Methods.* 2012;3:98-110  
47  
48 47. Dias S, Welton NJ, Caldwell DM, et al. Checking consistency in mixed treatment comparison  
49 meta-analysis. *Stat Med.* 2010;29:932-944  
50  
51 48. Lu G, Ades AE. Assessing evidence inconsistency in mixed treatment comparisons. *J Am Stat*  
52 *Assoc.* 2006;101:447-459.  
53  
54 49. Veroniki AA, Vasiliadis HS, Higgins JP, Salanti G. Evaluation of inconsistency in networks of  
55 interventions. *Int J Epidemiol.* 2013;42:332-345.  
56  
57  
58  
59  
60

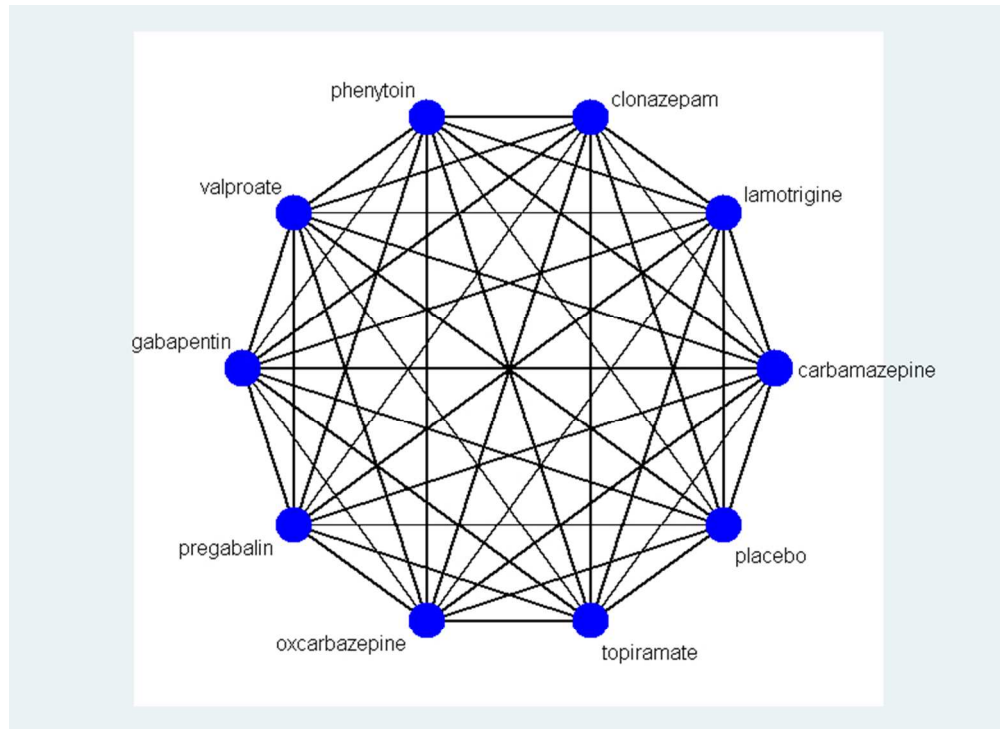

Network plot of all possible direct comparisons between the eligible interventions.

276x201mm (72 x 72 DPI)

1  
2  
3  
4  
5  
6  
7  
8  
9  
10  
11  
12  
13  
14  
15  
16  
17  
18  
19  
20  
21  
22  
23  
24  
25  
26  
27  
28  
29  
30  
31  
32  
33  
34  
35  
36  
37  
38  
39  
40  
41  
42  
43  
44  
45  
46  
47  
48  
49  
50  
51  
52  
53  
54  
55  
56  
57  
58  
59  
60

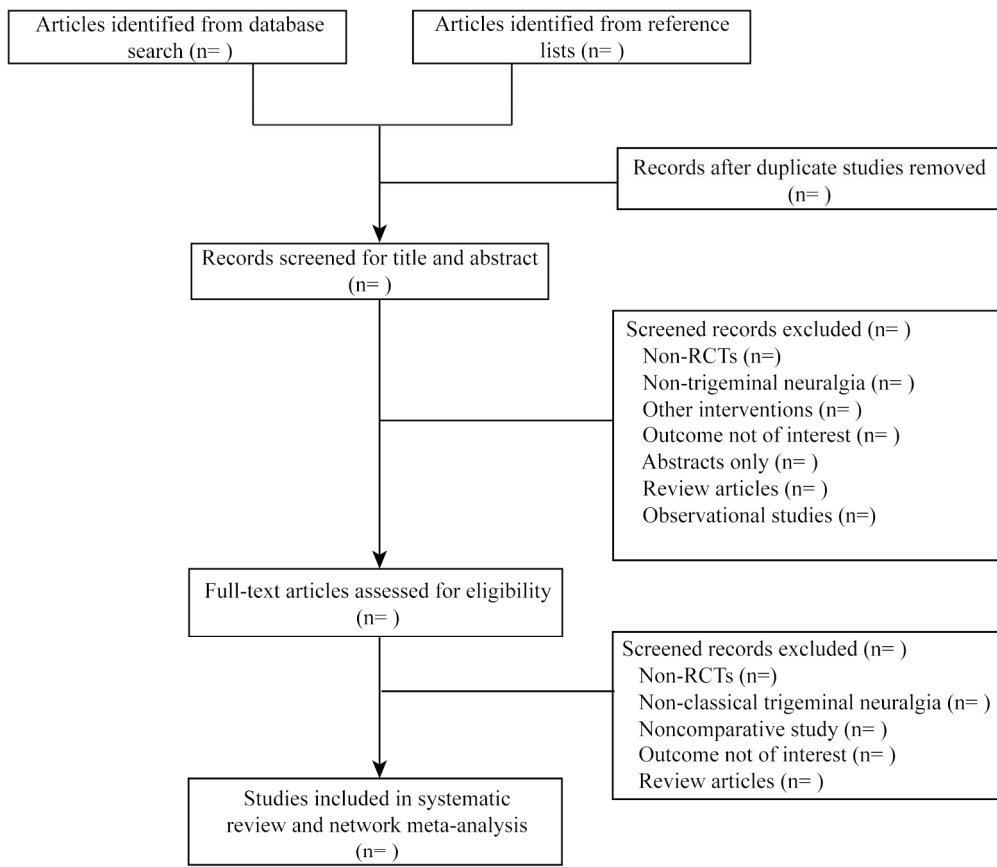

FIGURE 1. PRISMA flow chart.

PRISMA flow chart.

192x225mm (300 x 300 DPI)

**PRISMA-P (Preferred Reporting Items for Systematic review and Meta-Analysis Protocols) 2015 checklist: recommended items to address in a systematic review protocol\***

| Section and topic                 | Item No | Checklist item                                                                                                                                                                                                                                       |
|-----------------------------------|---------|------------------------------------------------------------------------------------------------------------------------------------------------------------------------------------------------------------------------------------------------------|
| <b>ADMINISTRATIVE INFORMATION</b> |         |                                                                                                                                                                                                                                                      |
| Title:                            |         |                                                                                                                                                                                                                                                      |
| Identification                    | 1a      | Identify the report as a protocol of a systematic review <a href="#">Page 1</a>                                                                                                                                                                      |
| Update                            | 1b      | If the protocol is for an update of a previous systematic review, identify as such <a href="#">NA</a>                                                                                                                                                |
| Registration                      | 2       | If registered, provide the name of the registry (such as PROSPERO) and registration number <a href="#">Page 2</a>                                                                                                                                    |
| Authors:                          |         |                                                                                                                                                                                                                                                      |
| Contact                           | 3a      | Provide name, institutional affiliation, e-mail address of all protocol authors; provide physical mailing address of corresponding author <a href="#">Page 1</a>                                                                                     |
| Contributions                     | 3b      | Describe contributions of protocol authors and identify the guarantor of the review <a href="#">Page 11</a>                                                                                                                                          |
| Amendments                        | 4       | If the protocol represents an amendment of a previously completed or published protocol, identify as such and list changes; otherwise, state plan for documenting important protocol amendments <a href="#">Page 11</a>                              |
| Support:                          |         |                                                                                                                                                                                                                                                      |
| Sources                           | 5a      | Indicate sources of financial or other support for the review <a href="#">Page 11</a>                                                                                                                                                                |
| Sponsor                           | 5b      | Provide name for the review funder and/or sponsor <a href="#">Page 11</a>                                                                                                                                                                            |
| Role of sponsor or funder         | 5c      | Describe roles of funder(s), sponsor(s), and/or institution(s), if any, in developing the protocol <a href="#">Page 11</a>                                                                                                                           |
| <b>INTRODUCTION</b>               |         |                                                                                                                                                                                                                                                      |
| Rationale                         | 6       | Describe the rationale for the review in the context of what is already known <a href="#">Page 3</a>                                                                                                                                                 |
| Objectives                        | 7       | Provide an explicit statement of the question(s) the review will address with reference to participants, interventions, comparators, and outcomes (PICO) <a href="#">Page 4</a>                                                                      |
| <b>METHODS</b>                    |         |                                                                                                                                                                                                                                                      |
| Eligibility criteria              | 8       | Specify the study characteristics (such as PICO, study design, setting, time frame) and report characteristics (such as years considered, language, publication status) to be used as criteria for eligibility for the review <a href="#">Page 4</a> |
| Information sources               | 9       | Describe all intended information sources (such as electronic databases, contact with study authors, trial registers or other grey literature sources) with planned dates of coverage <a href="#">Page 5</a>                                         |
| Search strategy                   | 10      | Present draft of search strategy to be used for at least one electronic database, including planned limits, such that it could be repeated <a href="#">Page 6</a>                                                                                    |
| Study records:                    |         |                                                                                                                                                                                                                                                      |
| Data management                   | 11a     | Describe the mechanism(s) that will be used to manage records and data throughout the review <a href="#">Page 6-7</a>                                                                                                                                |

|                                    |     |                                                                                                                                                                                                                                                                         |
|------------------------------------|-----|-------------------------------------------------------------------------------------------------------------------------------------------------------------------------------------------------------------------------------------------------------------------------|
| Selection process                  | 11b | State the process that will be used for selecting studies (such as two independent reviewers) through each phase of the review (that is, screening, eligibility and inclusion in meta-analysis) <a href="#">Page 6-7</a>                                                |
| Data collection process            | 11c | Describe planned method of extracting data from reports (such as piloting forms, done independently, in duplicate), any processes for obtaining and confirming data from investigators <a href="#">Page 6-7</a>                                                         |
| Data items                         | 12  | List and define all variables for which data will be sought (such as PICO items, funding sources), any pre-planned data assumptions and simplifications <a href="#">Page 6-7</a>                                                                                        |
| Outcomes and prioritization        | 13  | List and define all outcomes for which data will be sought, including prioritization of main and additional outcomes, with rationale <a href="#">Page 5-6</a>                                                                                                           |
| Risk of bias in individual studies | 14  | Describe anticipated methods for assessing risk of bias of individual studies, including whether this will be done at the outcome or study level, or both; state how this information will be used in data synthesis <a href="#">Page 7</a>                             |
| Data synthesis                     | 15a | Describe criteria under which study data will be quantitatively synthesised <a href="#">Page 7-8</a>                                                                                                                                                                    |
|                                    | 15b | If data are appropriate for quantitative synthesis, describe planned summary measures, methods of handling data and methods of combining data from studies, including any planned exploration of consistency (such as $I^2$ , Kendall's $\tau$ ) <a href="#">Page 8</a> |
|                                    | 15c | Describe any proposed additional analyses (such as sensitivity or subgroup analyses, meta-regression) <a href="#">Page 9-10</a>                                                                                                                                         |
|                                    | 15d | If quantitative synthesis is not appropriate, describe the type of summary planned <a href="#">Page 9-10</a>                                                                                                                                                            |
| Meta-bias(es)                      | 16  | Specify any planned assessment of meta-bias(es) (such as publication bias across studies, selective reporting within studies) <a href="#">Page 7</a>                                                                                                                    |
| Confidence in cumulative evidence  | 17  | Describe how the strength of the body of evidence will be assessed (such as GRADE) <a href="#">Page 7</a>                                                                                                                                                               |

**\* It is strongly recommended that this checklist be read in conjunction with the PRISMA-P Explanation and Elaboration (cite when available) for important clarification on the items. Amendments to a review protocol should be tracked and dated. The copyright for PRISMA-P (including checklist) is held by the PRISMA-P Group and is distributed under a Creative Commons Attribution Licence 4.0.**

*From: Shamseer L, Moher D, Clarke M, Ghersi D, Liberati A, Petticrew M, Shekelle P, Stewart L, PRISMA-P Group. Preferred reporting items for systematic review and meta-analysis protocols (PRISMA-P) 2015: elaboration and explanation. BMJ. 2015 Jan 2;349(jan02 1):g7647.*

## PubMed

### Patient

#1 "Trigeminal Neuralgia"[Mesh]

#2 Trigeminal Neuralgia\*[Title/Abstract] OR Trifacial Neuralgia\*[Title/Abstract] OR Fothergill Disease[Title/Abstract] OR Tic Douloureux[Title/Abstract] OR Epileptiform Neuralgia\*[Title/Abstract] OR trigeminus neuralgia[Title/Abstract] OR prosopalgia[Title/Abstract] OR prosoponeuralgia[Title/Abstract] OR trigeminal nerve neuralgia[Title/Abstract] OR trigeminal nerve neuropathy[Title/Abstract] OR trigeminal neuropathy[Title/Abstract] OR trigeminus nerve neuralgia[Title/Abstract] OR trigeminus nerve neuropathy[Title/Abstract]

#3 #1 OR #2

### RCT

#4 "Clinical Trials, Phase II as Topic"[Mesh] OR "Clinical Trials, Phase III as Topic"[Mesh] OR "Clinical Trials, Phase IV as Topic"[Mesh] OR "Controlled Clinical Trials as Topic"[Mesh] OR "Randomized Controlled Trials as Topic"[Mesh] OR "Intention to Treat Analysis"[Mesh] OR "Pragmatic Clinical Trials as Topic"[Mesh] OR "Clinical Trials, Phase II"[Publication Type] OR "Clinical Trials, Phase III"[Publication Type] OR "Clinical Trials, Phase IV"[Publication Type] OR "Controlled Clinical Trials"[Publication Type] OR "Randomized Controlled Trials"[Publication Type] OR "Pragmatic Clinical Trials as Topic"[Publication Type] OR "Single-Blind Method"[Mesh] OR "Double-Blind Method"[Mesh]

#5 random\*[Title/Abstract] OR blind\*[Title/Abstract] OR singleblind\*[Title/Abstract] OR doubleblind\*[Title/Abstract] OR trebleblind\*[Title/Abstract] OR tripleblind\*[Title/Abstract]

#6 #4 OR #5

#7 #3 AND #6

## EMBASE.com

### Patient

#1 'trigeminus neuralgia'/exp

#2 'trigeminal neuralgias':ab,ti OR 'trifacial neuralgias':ab,ti OR 'trigeminal neuralgia':ab,ti OR 'trifacial neuralgia':ab,ti OR 'fothergill disease':ab,ti OR 'tic douloureux':ab,ti OR 'epileptiform neuralgia':ab,ti OR 'epileptiform neuralgias':ab,ti OR 'trigeminus neuralgia':ab,ti OR prosopalgia:ab,ti OR prosoponeuralgia:ab,ti OR 'trigeminal nerve neuralgia':ab,ti OR 'trigeminal nerve neuropathy':ab,ti OR 'rigeminal neuropathy':ab,ti OR 'trigeminus nerve neuralgia':ab,ti OR 'trigeminus nerve neuropathy':ab,ti

#3 #1 OR #2

### RCT

#4 'multicenter study (topic)'/exp OR 'phase 2 clinical trial (topic)'/exp OR 'phase 3 clinical trial

(topic)/exp OR 'phase 4 clinical trial (topic)/exp OR 'controlled clinical trial (topic)/exp OR 'randomized controlled trial (topic)/exp OR 'single blind procedure'/exp OR 'double blind procedure'/exp

#5 random\*:ab,ti OR blind\*:ab,ti OR singleblind\*:ab,ti OR doubleblind\*:ab,ti OR trebleblind\*:ab,ti OR tripleblind\*:ab,ti

#6 #4 OR #5

#7 #3 AND #6

## Cochrane Library

#1 MeSH descriptor: [Trigeminal Neuralgia] explode all trees

#2 Trigeminal Neuralgia\*:ti,ab,kw or Trifacial Neuralgia\*:ti,ab,kw or Fothergill Disease:ti,ab,kw or Tic Douloureux:ti,ab,kw or Epileptiform Neuralgia\*:ti,ab,kw or trigeminus neuralgia:ti,ab,kw or prosopalgia:ti,ab,kw or prosoponeuralgia:ti,ab,kw or trigeminal nerve neuralgia:ti,ab,kw or trigeminal nerve neuropathy:ti,ab,kw or trigeminal neuropathy:ti,ab,kw or trigeminus nerve neuralgia:ti,ab,kw or trigeminus nerve neuropathy:ti,ab,kw

#3 #1 or #2

# BMJ Open

## Comparative Efficacy and Acceptability of Antiepileptic Drugs for Classical Trigeminal Neuralgia: A Bayesian Network Meta-Analysis Protocol

|                                 |                                                                                                                                                                                                                                                                                                                                                                                                                                                                                                                                                                                                                                                                                                                                                                                                                                                                                                                                                                                                                                                                              |
|---------------------------------|------------------------------------------------------------------------------------------------------------------------------------------------------------------------------------------------------------------------------------------------------------------------------------------------------------------------------------------------------------------------------------------------------------------------------------------------------------------------------------------------------------------------------------------------------------------------------------------------------------------------------------------------------------------------------------------------------------------------------------------------------------------------------------------------------------------------------------------------------------------------------------------------------------------------------------------------------------------------------------------------------------------------------------------------------------------------------|
| Journal:                        | <i>BMJ Open</i>                                                                                                                                                                                                                                                                                                                                                                                                                                                                                                                                                                                                                                                                                                                                                                                                                                                                                                                                                                                                                                                              |
| Manuscript ID                   | bmjopen-2017-017392.R1                                                                                                                                                                                                                                                                                                                                                                                                                                                                                                                                                                                                                                                                                                                                                                                                                                                                                                                                                                                                                                                       |
| Article Type:                   | Protocol                                                                                                                                                                                                                                                                                                                                                                                                                                                                                                                                                                                                                                                                                                                                                                                                                                                                                                                                                                                                                                                                     |
| Date Submitted by the Author:   | 21-Jul-2017                                                                                                                                                                                                                                                                                                                                                                                                                                                                                                                                                                                                                                                                                                                                                                                                                                                                                                                                                                                                                                                                  |
| Complete List of Authors:       | <p>Qin, Zongshi; Guang'anmen Hospital, China Academy of Chinese Medical Sciences, Department of Acupuncture and Neurology</p> <p>Xie, Shang; Peking University School and Hospital of Stomatology, Department of Oral and Maxillofacial Surgery</p> <p>Mao, Zhi; Chinese People's Liberation Army General Hospital, Department of Critical Care Medicine</p> <p>Liu, Yan; China Academy of Chinese Medical Sciences, Data Centre of Traditional Chinese Medicine</p> <p>WU, Jiani; Guang'anmen Hospital, China Academy of Chinese Medical Sciences, Department of Acupuncture and Neurology</p> <p>Furukawa, Toshi; Kyoto University, Graduate School of Medicine and School of Public Health</p> <p>Kwong, Joey; Taipei Medical University, Cochrane Taiwan; National Center for Child Health and Development, Department of Health Policy &amp; Department of Clinical Epidemiology</p> <p>Tian, Jinhui; Evidence based medicine center,</p> <p>Liu, Zhishun; Guang'anmen Hospital, China Academy of Chinese Medical Sciences, Department of Acupuncture and Neurology</p> |
| <b>Primary Subject Heading</b>: | Evidence based practice                                                                                                                                                                                                                                                                                                                                                                                                                                                                                                                                                                                                                                                                                                                                                                                                                                                                                                                                                                                                                                                      |
| Secondary Subject Heading:      | Neurology                                                                                                                                                                                                                                                                                                                                                                                                                                                                                                                                                                                                                                                                                                                                                                                                                                                                                                                                                                                                                                                                    |
| Keywords:                       | antiepileptic drugs, trigeminal neuralgia, network meta-analysis, systematic review, protocol                                                                                                                                                                                                                                                                                                                                                                                                                                                                                                                                                                                                                                                                                                                                                                                                                                                                                                                                                                                |
|                                 |                                                                                                                                                                                                                                                                                                                                                                                                                                                                                                                                                                                                                                                                                                                                                                                                                                                                                                                                                                                                                                                                              |

SCHOLARONE™  
Manuscripts



1  
2  
3 **Comparative Efficacy and Acceptability of Antiepileptic Drugs for Classical**  
4 **Trigeminal Neuralgia: A Bayesian Network Meta-Analysis Protocol**  
5  
6  
7

8  
9 Zongshi Qin,<sup>1</sup> Shang Xie<sup>2</sup>, Zhi Mao<sup>3</sup>, Yan Liu<sup>4</sup>, Jiani Wu<sup>1</sup>, Toshi A Furukawa<sup>5</sup>, Joey S.W.  
10 Kwong<sup>6,7</sup>, Jinhui Tian<sup>8</sup>, Zhishun Liu<sup>1</sup>

11  
12 <sup>1</sup> Department of Acupuncture and Neurology, Guang'anmen Hospital, China Academy of Chinese  
13 Medical Sciences, Beijing, China

14  
15 <sup>2</sup> Department of Oral and Maxillofacial Surgery, Peking University School and Hospital of  
16 Stomatology, Beijing, China

17  
18 <sup>3</sup> Department of Critical Care Medicine, Chinese People's Liberation Army General Hospital,  
19 Beijing, China

20  
21 <sup>4</sup> Data Centre of Traditional Chinese Medicine, China Academy of Chinese Medical Sciences,  
22 Beijing, China

23  
24 <sup>5</sup> Department of Health Promotion and Human Behavior, Kyoto University Graduate School of  
25 Medicine/School of Public Health, Kyoto, Japan

26  
27 <sup>6</sup> Cochrane Taiwan, Taipei Medical University, Taipei, Taiwan

28  
29 <sup>7</sup> Department of Health Policy & Department of Clinical Epidemiology, National Center for Child  
30 Health and Development, Tokyo, Japan

31  
32 <sup>8</sup> Evidence-based Medicine Center, Lanzhou University, Lanzhou, China

33  
34 ZQ, SX and ZM contributed equally to this work.

35  
36 Correspondence to: Jinhui Tian, email: tianjh@lzu.edu.cn; Zhishun Liu, email:  
37 liuzhishun@aliyun.com

38  
39  
40  
41  
42  
43  
44  
45  
46  
47  
48  
49  
50  
51  
52  
53  
54  
55  
56  
57  
58  
59  
60  
Keywords: antiepileptic drugs; trigeminal neuralgia; network meta-analysis; systematic review;  
protocol

## ABSTRACT

**Introduction** Trigeminal neuralgia (TN) affects 4 to 28.9/100,000 people worldwide, and antiepileptic drugs such as carbamazepine and oxcarbazepine are the first-line treatment options. However, the efficacy and safety of other antiepileptic drugs remain unclear due to insufficient direct comparisons.

**Objective** To compare the efficacy and acceptability of all currently available antiepileptic agents for the treatment of patients with classical TN.

**Methods** We will search the PubMed, EMBASE, Cochrane Library, and Web of Science databases for unpublished or undergoing research listed in registry platforms. We will include all randomized controlled trials comparing two different antiepileptic drugs or one antiepileptic drug with placebo in patients with classic TN. The primary outcomes will be the proportion of responders and the number of subjects who drop out during the treatment. The secondary outcomes include the two primary outcomes but set in the follow-up period, changes in the self-reporting assessment scale for neuralgia, and quality of life assessment. In terms of network meta-analysis, we will fit our model in a Bayesian framework using WinBUGS (Medical Research Council's Biostatistics Unit, Cambridge, UK). To confirm the results, we will also conduct analyses using Stata (Version 13.0; Stata Corporation, College Station, Texas, USA) and compare the differences between the two platforms.

**Ethics and dissemination** This protocol will not disseminate any private patient data. The results of this review will be disseminated through peer-reviewed publication.

**Protocol registration for this systematic review (registration number):** PROSPERO (CRD: 42016048640).

### Strengths and limitations of this study

- To the best of the authors' knowledge, this study will be the first network meta-analysis that assess the comparative efficacy and acceptability of all the available antiepileptic drugs for the classical trigeminal neuralgia.
- This study will be performed by Bayesian framework, which enables us to estimate the probability for each intervention to be the best for each outcome.
- Owing to the language barrier, the amount of included trials might be potentially limited.

## Introduction

Classical trigeminal neuralgia (TN), a chronic pain disorder described as one of the most severe pains one can suffer, is characterized by paroxysms of unilateral, electric shock-like, and severe pain along the trigeminal nerve divisions.<sup>1,2</sup> It affects lifestyle because it can be triggered by common activities such as eating, talking, shaving and brushing teeth. The wind, chewing and talking also aggravate the condition in many patients.<sup>2</sup> It is estimated that approximately 4 to 28.9 per 100,000 people worldwide suffer from TN, and the number affected tends to be higher among women at all ages and even increases with age.<sup>3,4</sup>

At present, the cause of TN remains unclear.<sup>5,6</sup> One hypothesis is that the trigeminal nerve becomes compressed at the root entry zone by cerebral vessels.<sup>7</sup> Owing to the contradictory etiology and poorly understood pathophysiological mechanisms underlying TN, a variety of therapeutic and surgical approaches have been developed to alleviate the associated pain and improve the quality of life in patients with classical TN.<sup>8-10</sup> Although many patients have obtained excellent outcomes from surgery, many others do not experience any pain relief.<sup>11,12</sup> Furthermore, the currently available surgical procedures are associated with various complications, particularly sensory loss in the trigeminal nerve territory, anesthesia dolorosa and, rarely, ipsilateral hearing loss, depending on the technique.<sup>13,14</sup>

As such, pharmacological measures to improve clinical outcomes are needed. The most commonly used option is antiepileptic drugs, with phenytoin being the first drug used for classical TN with positive effect.<sup>15</sup> Carbamazepine can reduce both the frequency and intensity of painful paroxysms and was first introduced by the US Food and Drug Administration (FDA); however, its efficacy is compromised by poor tolerability.<sup>16</sup> Oxcarbazepine, a derivative of carbamazepine, is often used as an initial treatment for classical TN and has more favorable properties than carbamazepine related to its increased efficacy in epilepsy, greater tolerability and decreased potential for drug interactions.<sup>17</sup> Lamotrigine has also been reported as an effective add-on therapy,<sup>18</sup> whereas little evidence supports that other antiepileptic drugs such as clonazepam, gabapentin, pregabalin and valproate have a beneficial effect.<sup>19-22</sup> However, many of the studies are old with limited methodology, and were assessed as low GRADE scores.<sup>23</sup>

To date, several systematic reviews have investigated the comparative efficacy and safety of antiepileptic drugs.<sup>20,24-28</sup> However, previous systematic reviews have only considered pair-wise

1  
2  
3 evidence from head-to-head comparisons and have thus failed to assess the comparative efficacy  
4 and acceptability of all available antiepileptic drugs. Thus, it is difficult to determine the best  
5 treatments for relieving pain with minimal adverse effects. In the present study, we will apply  
6 network meta-analysis to integrate direct and indirect comparisons,<sup>29,30</sup> which could be used not  
7 only to strengthen inferences concerning the efficacy and acceptability of treatments but also to  
8 rank the efficacy and acceptability of antiepileptic drugs accordingly.<sup>31</sup>

9  
10  
11 The objectives of this systematic review and network meta-analysis are 1) to compare all currently  
12 available antiepileptic drugs in terms of efficacy and acceptability in classical TN treatment and 2)  
13 to determine which drug achieves the best balance between efficacy and adverse effects. The  
14 results of this study will augment findings based on current pair-wise meta-analyses and are  
15 expected to provide important information to support clinical practice and health policy decisions.  
16  
17  
18  
19  
20  
21  
22  
23  
24

## 25 26 **METHODS**

27  
28 This protocol will be conducted in accordance with the reporting guidance provided in the  
29 Preferred Reporting Items for Systematic Reviews and Meta-Analysis Protocols (PRISMA-P)  
30 statement and Checklist of Items to Include When Reporting a Systematic Review Involving a  
31 Network Meta-analysis.<sup>32,33</sup> The protocol is registered in PROSPERO (CRD: 42016048640). This  
32 study will not involve any private patient data, ethical approval was waived. (supplemental file 1  
33 represents the PRISMA-P checklist)  
34  
35  
36  
37  
38  
39  
40

### 41 **Eligibility criteria**

#### 42 **Study types**

43  
44 We will include randomized controlled trials (RCTs) comparing one antiepileptic drug with  
45 another antiepileptic drug as monotherapy or placebo for the treatment of TN. Quasi-randomized  
46 controlled trails allocating participants according to birth date or the consequences of enrollment  
47 will be excluded. The minimum duration for RCT inclusion was set at 4 weeks. Trials with more  
48 than a two-arm design will be considered only if the available data meet the criteria for an  
49 intervention. For trials with a crossover design, data will only be extracted from the first  
50 randomization period.  
51  
52  
53  
54  
55  
56  
57  
58  
59  
60

### Participant characteristics

Only trials that enrolled participants with a diagnosis of classical TN according to standardized criteria such as the classification of the International Headache Society (IHS) of International Classification of Headache Disorders will be sought.<sup>1,34</sup> For studies using other extensive criteria for the diagnosis of classical TN, detailed diagnostic criteria must be reported (such as history or characteristics that have been confirmed by CT or MRI).<sup>35</sup> Studies examining symptomatic TN patients will not be included. Participants with comorbid conditions such as anxiety, depression, epilepsy or other medical conditions will also not be eligible for inclusion. No limitations will be imposed for age, sex, or nationality.

### Intervention types

We plan to include the following antiepileptic drugs: carbamazepine, lamotrigine, clonazepam, phenytoin, valproate, gabapentin, pregabalin, oxcarbazepine and topiramate. In addition to these antiepileptic drugs, we will also obtain information about interventions of interest from either pair-wise RCTs or placebo-controlled trials, as some RCTs design a placebo-controlled arm as the comparator. Figure 1 illustrates the network plot of all possible direct comparisons between the eligible interventions.

### Outcome measures

Studies reporting one of the following will be included.

#### Primary outcome

The primary objective of this review is to assess the efficacy and acceptability of antiepileptic drugs for classical TN; therefore, the following two outcomes will be used as the primary outcome.

1. The proportion of responders to a self-reporting assessment scale for neuralgia. A responder was defined as a subject who obtained a  $\geq 50\%$  pain reduction score from baseline to endpoint (4–12 weeks) or a subject who obtained a pain reducing score of no less than the minimal clinically important difference (MCID). Pain scores will be extracted based on the visual analogue score (VAS), numerical rating score (NRS), or any other validated scale for the assessment of overall TN symptoms when available.<sup>36</sup>

1  
2  
3  
4  
5  
6  
7  
8  
9  
10  
11  
12  
13  
14  
15  
16  
17  
18  
19  
20  
21  
22  
23  
24  
25  
26  
27  
28  
29  
30  
31  
32  
33  
34  
35  
36  
37  
38  
39  
40  
41  
42  
43  
44  
45  
46  
47  
48  
49  
50  
51  
52  
53  
54  
55  
56  
57  
58  
59  
60

2. Treatment acceptability is defined as the proportion of patients who have intervention related adverse events during the 4 to 12 weeks.

#### Secondary outcomes

1. The proportion of responders with  $\geq 50\%$  pain reduction on a self-reporting assessment scale for neuralgia from baseline to endpoint after follow-up.

2. The change in pain symptoms of TN from baseline to endpoint (4–12 weeks) measured based on the VAS, NRS, or any other validated scale for the assessment of overall TN symptoms when available.

3. The change in pain symptoms of TN from baseline to endpoint after follow-up.

4. The quality of life based on measurement with a validated scale, such as the Short Form 36 Health Survey questionnaire (SF-36).<sup>37</sup>

#### Search strategy

We will identify RCTs through a comprehensive, systematic literature search primarily utilizing the PubMed, EMBASE, Cochrane Library, and Web of Science databases. As publication bias caused by insufficient unpublished data can significantly bias the comparative efficacy results of network meta-analysis and modify rankings, we will also perform searches for unpublished or ongoing trials using System for information on Grey Literature in Europe (SIGLE) as well as other registry platforms, such as Clinicaltrials.gov and the International Clinical Trials Registry Platform. Prior to completing this review, we will perform an additional search of each database and registration platform to guarantee that the most recent studies are included. We will use medical subject headings and text words related to ‘trigeminal neuralgia’ and ‘randomized controlled trial’ for the literature search. In addition, the reference lists of previous systematic reviews will be examined to ensure the quantity and accuracy of the included studies. The search strategy will be developed by JT and ZL, we anticipate that the aforementioned databases will be searched at 30<sup>th</sup> Sept., 2017. (supplemental file 2 represents the search strategies for PubMed, EMBASE and Cochrane Library)

#### Data collection process

Two authors (SX and ZM) will scan the titles and abstracts of the trials after duplicated records

1  
2  
3 have been excluded using EndNote X7 (Thomson Reuters, New York, NY). The scanning will be  
4 performed using EndNote, and all trials will be allocated to the following five groups: inclusion  
5 group, non-patient group, intervention group, outcome group, and awaiting group. A prior data  
6 collection process will be conducted using an electro-table created with Excel software, which has  
7 been used in our previous study.<sup>38</sup> The table will consist of four sheets, including general  
8 information (author list, publication year, and journal), characteristics of included trials  
9 (diagnostic criteria, age range, study drugs, and dose range), the risk of bias assessed using the  
10 Cochrane risk of bias tool, and outcome data extraction (number of participants who responded to  
11 treatment and the number who dropped out during the treatment). All original data will be  
12 submitted as an attachment. A flow chart illustrating this design is presented in Figure 2.  
13  
14  
15  
16  
17  
18  
19  
20  
21  
22  
23

#### 24 **Quality assessment**

25  
26 Two authors (JW and YL) will use the Cochrane risk of bias tool to assess the risk of bias of  
27 eligible studies, covering randomization, concealment allocation, blinding and other biases.<sup>39</sup> As  
28 inadequate concealment could potentially fail the randomization test, two independent review  
29 authors will pay particular attention to the adequacy of random allocation concealment and  
30 blinding. The other sources of bias will be assessed while considering sample size calculation  
31 method, diagnostic criteria, reporting of withdrawals and follow-up. Two authors (JK and JT) will  
32 assess the quality of evidence using Grading of Recommendations Assessment, Development and  
33 Evaluation (GRADE) framework, covering study limitations, inconsistency, indirectness,  
34 imprecision and publication bias.<sup>40</sup> The methods for rating the quality of direct comparisons are  
35 the same to the methods used in traditional meta-analysis, and following steps will be used in the  
36 whole assessment procedure: 1) presenting direct and indirect effect estimates; 2) rating the  
37 quality of direct and indirect estimates; 3) presenting the results of network meta-analysis; 4)  
38 rating the quality of network meta-analysis effect estimates.  
39  
40  
41  
42  
43  
44  
45  
46  
47  
48  
49  
50  
51

#### 52 **Dealing with missing data**

53  
54 To obtain missing data, we will initially contact the senior or corresponding author. If no one  
55 responds, we will estimate the missing data as follows. For studies failing to report the number of  
56 responding patients after treatment, instead of providing the mean and standard deviation, we will  
57  
58  
59  
60

1  
2  
3 calculate the number of responding patients employing a validated imputation method.<sup>41</sup> In  
4  
5 addition, we will also estimate missing data from graphs when possible. For trials that cannot be  
6  
7 extracted or estimated, the available data will be excluded, and the reason for exclusion will be  
8  
9 reported.

### 10 11 12 13 **Statistical analysis**

14  
15 The method used for data synthesis will be based on mixed treatment meta-analysis. To examine  
16  
17 comparisons, we will use Stata (Version 13.0; Stata Corporation, College Station, Texas, USA) to  
18  
19 synthesize data and will present the comparison results if the included studies are sufficient for  
20  
21 each pair-wise comparison. We will use a random effects model to combine the data, and the  
22  
23 outcomes of continuous and binary variables will be presented as standardized mean differences  
24  
25 (SMDs) and odds ratios (ORs) with 95% confidential intervals (CIs). For indirect comparisons, a  
26  
27 random effects model network meta-analysis will be developed in a Bayesian framework using  
28  
29 Markov chain Monte Carlo simulation methods in WinBUGS (Medical Research Council's  
30  
31 Biostatistics Unit, Cambridge, UK). The results of network meta-analysis will use the arm-based  
32  
33 parameterization for random effects model.<sup>42</sup> This will enable us to estimate the best probability  
34  
35 for each intervention for each positive outcome, given the results of the multiple-treatment  
36  
37 meta-analysis. At least one network focusing on the response rate for pain relief will be  
38  
39 constructed, in which a statistically significant difference defined as the null value will not be  
40  
41 included in the 95% CI. The Markov chains will be utilized for 50,000 simultaneous iterations  
42  
43 based on the data and the description of the proposed distributions for relevant parameters, and the  
44  
45 first 10,000 iterations will be discarded to avoid potential impact on the arbitrary value. For  
46  
47 continuous outcomes and binary outcomes, the OR and SMD will be presented with the 95%  
48  
49 credible interval (CrI). In this process, the Brooks-Gelman-Rubin method will be used to assess  
50  
51 the convergence between direct and indirect variances. According to the theory of Brooks and  
52  
53 Gelman, if a potential scale reduction factor (PSRF) is less than 1.2, then an approximate  
54  
55 convergence has occurred. The PSRF results will be presented graphically using a  
56  
57 Brooks-Gelman-Rubin diagnosis plot, if needed. To describe relationships among different  
58  
59 treatments, a network plot will be created to show direct comparisons between arms based on  
60  
61 different outcomes. To confirm the results, we will also conduct the same network meta-analysis



1  
2  
3 using the network package of Stata ([http://www.mrc-bsu.cam.ac.uk/IW\\_Stata/](http://www.mrc-bsu.cam.ac.uk/IW_Stata/)), and the outcome  
4 will be compared to that produced using WinBUGS. In addition, the effectiveness of each  
5 treatment among all available treatments will be ranked by calculating the OR in order, and plots  
6 of the surfaces under the cumulative ranking curves (SUCRAs) will be generated to rank the  
7 various treatments for each outcome.<sup>43</sup> We will also present a cluster rank table to synthesize the  
8 efficacy and acceptability of each drug (using two primary outcomes). The table will consist of  
9 two triangles: the upper right triangle will illustrate the acceptability, and the lower left triangle  
10 will illustrate the efficacy.<sup>31</sup>

### 19 **Assessment of heterogeneity**

20 Heterogeneity, which plays a pivotal role in both standard meta-analysis and network  
21 meta-analysis, refers to the degree of disagreement between study-specific treatment effects and  
22 constitutes the basis of inconsistency. To test the heterogeneity of each pair-wise comparison, we  
23 will use the  $I^2$  statistic.<sup>44</sup>

### 30 **Assessment of transitivity and similarity**

31 In addition to the heterogeneity assessment using the  $I^2$  statistic, the assumption of transitivity and  
32 similarity based on clinical and methodological characteristics will be assessed. It should be noted  
33 that it is difficult to identify these effect modifiers using statistical analysis. We will assume that  
34 intervention effects are transitive in this network meta-analysis because we will only focus on  
35 antiepileptic drugs, and we will investigate similarity based on clinical characteristics, such as  
36 antiepileptic drug dose, period of treatment, and severity of pain symptoms at baseline, as well as  
37 according to methodological characteristics such as study quality.<sup>45</sup> All these effect modifiers will  
38 be judged and reported before the network meta-analysis is conducted.

### 48 **Assessment of inconsistency**

49 The evaluation and explanation of inconsistency is another basic objective of network  
50 meta-analysis. In this context, inconsistency refers to the degree of difference between direct and  
51 indirect comparisons and can be evaluated only when a loop exists in the evidence network. This  
52 means that inconsistency assessment using a design-by-treatment interaction model cannot be  
53 conducted if the structure of this network is a “star network” (i.e., all interventions have a single  
54  
55  
56  
57  
58  
59  
60

1  
2  
3 mutual comparator, such as a placebo).<sup>46,47</sup> For such cases, we will test inconsistency using a  
4  
5 node-splitting model.<sup>48</sup>  
6

7 To identify inconsistency among the included trials of the network, we will use Stata, performing  
8  
9 the Z test to compare direct and indirect summary effects in specific loops.<sup>49</sup> If there is no  
10  
11 inconsistency between loops or designs, we will use a consistency model to calculate the data. For  
12  
13 cases of significant incoherence, we will initially look for data extraction errors in loops that  
14  
15 present inconsistency and in comparisons with large heterogeneity.<sup>50</sup> After the data have been  
16  
17 scrutinized, we will investigate possible sources of inconsistency within clinical and  
18  
19 methodological variables suspected of being potential sources of either heterogeneity or  
20  
21 incoherence in each comparison-specific group of trials. If an important inconsistency cannot be  
22  
23 explained, we will consider avoiding synthesis of the related network.  
24  
25

#### 26 **Additional analyses**

27  
28 To ensure the quality of this review, studies not reporting blinding will be excluded prior to data  
29  
30 synthesis because blinding plays a vital important role in the randomized controlled trial. We will  
31  
32 assess heterogeneity quantitatively using the I<sup>2</sup> statistic, and if an I<sup>2</sup> value is greater than 50%, then  
33  
34 we will explore the source of heterogeneity. We will initially perform sensitivity analysis by  
35  
36 excluding trials rated as having a high risk of bias. Additionally, meta-regression or subgroup  
37  
38 analysis will be used to explore possible sources of heterogeneity if the number of included trials  
39  
40 is sufficient. For network meta-regression, we will use a random effects network meta-regression  
41  
42 model to examine potential factors.  
43  
44

#### 45 **Discussion**

46  
47 To the best of our knowledge, no network meta-analyses comparing the use of antiepileptic drugs  
48  
49 for treatment of classical TN have been conducted to date. Previous systematic reviews have  
50  
51 compared only a single drug to other types of drug or therapy.<sup>20,24-28</sup> This makes it difficult to  
52  
53 obtain a clear understanding of the effectiveness of the various different conservative treatments  
54  
55 for this disorder. Network meta-analysis can be used to perform indirect comparisons and allows  
56  
57 parameters for direct and indirect comparisons to be synthesized. To ensure the quantity and  
58  
59 quality of the potentially included RCTs, we will perform an extensive literature search and  
60

1  
2  
3 predefine rigorous inclusion criteria. Besides, we will assess the quality of evidence with the  
4 GRADE framework. Although a ranking of the included interventions will be generated, with the  
5 exception of findings, the quality of evidence should also be considered. We hope that the results  
6 of this review help clinicians make more accurate treatment decisions and promote additional  
7 research into conservative treatments for classical TN.  
8  
9  
10  
11  
12  
13  
14  
15  
16  
17  
18  
19  
20  
21  
22  
23  
24  
25  
26  
27  
28  
29  
30  
31  
32  
33  
34  
35  
36  
37  
38  
39  
40  
41  
42  
43  
44  
45  
46  
47  
48  
49  
50  
51  
52  
53  
54  
55  
56  
57  
58  
59  
60

For peer review only

**Amendments**

If it is necessary to update this protocol, we will update this protocol in the future. We will submit the original protocol, final protocol and summary of changes as a supplement.

**Authors' contributions**

ZQ, SX, and ZM conceived of the study. JT and SX developed the search strategies. ZQ, JT and SX wrote the first draft. TAF and ZL revised the draft. SX and ZM will independently screen potential studies and extract data from the included studies. JW, JK, JT and YL will assess the risk of bias and summarize the evidence. ZM, SX, JK and ZL will address the missing data, if any. ZQ and JT will perform the statistical analysis. ZL and JT will arbitrate in cases of disagreement and ensure the absence of errors. All authors approve the publication of this protocol.

**Ethics and dissemination**

This protocol will not disseminate any private patient data. The results of this review will be disseminated through peer-reviewed publication.

**Competing interests:** None.

**Funding:** None.

**Reference**

1. Headache Classification Committee of the International Headache Society (IHS). The International Classification of Headache Disorders, 3rd edition (beta version). *Cephalalgia*. 2013;33:629-808.
2. Zakrzewska JM, Linskey ME. Trigeminal neuralgia. *BMJ*. 2015;350:h1238
3. Meller D, Obermann M, Yoon MS, Poitz F, Hansen N, Slomke MA. Prevalence of trigeminal neuralgia and persistent idiopathic facial pain: a population-based study. *Cephalalgia*. 2011;31:1542-1548.
4. MacDonald BK, Cockerell OC, Sander JW, Shorvon SD. The incidence and lifetime prevalence of neurological disorders in a prospective community-based study in the UK. *Brain*. 2000;123:665-676.
5. Devor M, Amir R, Rappaport ZH. Pathophysiology of trigeminal neuralgia: the ignition hypothesis. *Clin J Pain*. 2002;18:4-13.
6. Danielle DD, Hodaie M, Davis KD. Structural magnetic resonance imaging can identify trigeminal system abnormalities in classical trigeminal neuralgia. *Front Neuroanat*. 2016;10:95.
7. Katusic S, Beard CM, Bergstralh E, Kurland LT. Incidence and clinical features of trigeminal neuralgia, Rochester, Minnesota, 1945-1984. *Ann Neurol*. 1990;27:89-95.
8. Gronseth G, Cruccu G, Alksne J, et al. Practice parameter: the diagnostic evaluation and treatment of trigeminal neuralgia (an evidence-based review): report of the Quality Standards Subcommittee of the American Academy of Neurology and the European Federation of Neurological Societies. *Neurology*. 2008;71:1183-1190.
9. Campbell FG, Graham JG, Zilkha KJ. Clinical trial of carbamazepine (tegretol) in trigeminal neuralgia. *J Neurol Neurosurg Psychiatry*. 1966;29:265-267.
10. Fromm GH, Terrence CF, Chattha AS. Baclofen in the treatment of trigeminal neuralgia: double-blind study and long-term follow-up. *Ann Neurol*. 1984;15:240-244.
11. Zakrzewska JM, Lopez BC, Kim SE, Coakham HB. Patient reports of satisfaction after microvascular decompression and partial sensory rhizotomy for trigeminal neuralgia. *Neurosurgery*. 2005;56:1304-1311.
12. A Nanda, V Javalkar, S Zhang, O Ahmed. Long term efficacy and patient satisfaction of microvascular decompression and gamma knife radiosurgery for trigeminal neuralgia. *Journal of Clinical Neuroscience* 2015;22:818-822.
13. Linskey ME, Ratanatharathorn V, Peñagaricano J. A prospective cohort study of microvascular decompression and Gamma Knife surgery in patients with trigeminal. *J Neurosurg*. 2008;109 Suppl:160-172.
14. Zakrzewska JM, Thomas DG. Patient's assessment of outcome after three surgical procedures for the management of trigeminal neuralgia. *Acta Neurochir (Wien)*. 1993;122:225-230.
15. Sindrup SH, Jensen TS. Pharmacotherapy of trigeminal neuralgia. *Clin J Pain* 2002;18:22-27.
16. Wiffen PJ, McQuay HJ, Moore RA. Carbamazepine for acute and chronic pain. *Cochrane*

- 1  
2  
3 Database Syst Rev. 2005;(3):CD005451.
- 4 17. Zakrzewska JM, Patsalos PN. Long-term cohort study comparing medical (oxcarbazepine) and  
5 surgical management of intractable trigeminal neuralgia. *Pain*. 2002;95:259-66
- 6 18. Zakrzewska JM, Chaudhry Z, Nurmikko TJ, et al. Lamotrigine (Lamictal) in refractory  
7 trigeminal neuralgia: results from a double-blind placebo controlled crossover trial. *Pain*.  
8 1997;73:223-230.
- 9 19. Court JE, Kase CS. Treatment of tic douloureux with a new anticonvulsant (clonazepam). *J*  
10 *Neurol Neurosurg Psychiatry*. 1976;39:297-299.
- 11 20. Yuan M, Zhou HY, Xiao ZL, et al. Efficacy and Safety of Gabapentin vs. Carbamazepine in  
12 the Treatment of Trigeminal Neuralgia: A Meta-Analysis. *Pain Pract*. 2016;16:1083-1091
- 13 21. Obermann M, Yoon MS, Sensen K, Maschke M, Diener HC, Katsarava Z. Efficacy of  
14 pregabalin in the treatment of trigeminal neuralgia. *Cephalalgia*. 2008;28:174-181.
- 15 22. Peiris JB, Perera GL, Devendra SV, Lionel ND. Sodium valproate in trigeminal neuralgia.  
16 *Med J Aust*. 1980;2:278.
- 17 23. Zakrzewska JM, Linskey ME. Trigeminal neuralgia. *Clin Evid*. 2014;10:1207
- 18 24. McQuay H, Carroll D, Jadad AR, et al. Anticonvulsant drugs for management of pain: a  
19 systematic review. *BMJ*. 1995;311:1047-1052.
- 20 25. Wiffen PJ, Rees J. Lamotrigine for acute and chronic pain. *Cochrane Database Syst Rev*.  
21 2007;(2):CD006044.
- 22 26. Wiffen PJ, McQuay HJ, Rees J, Moore RA. Gabapentin for acute and chronic pain. *Cochrane*  
23 *Database Syst Rev*. 2005;(3):CD005452.
- 24 27. Wiffen PJ, Derry S, Moore RA, McQuay HJ. Carbamazepine for acute and chronic pain in  
25 adults. *Cochrane Database Syst Rev*. 2011;(1):CD005451.
- 26 28. Moore RA, Straube S, Wiffen PJ, Derry S, McQuay HJ. Pregabalin for acute and chronic pain  
27 in adults. *Cochrane Database Syst Rev*. 2009;(3):CD007076.
- 28 29. Caldwell DM, Ades AE, Higgins JP. Simultaneous comparison of multiple treatments:  
29 combining direct and indirect evidence. *BMJ*. 2005;331:897-900.
- 30 30. Cipriani A, Higgins JP, Geddes JR, Salanti G. Conceptual and technical challenges in network  
31 meta-analysis. *Ann Intern Med*. 2013;159:130-137.
- 32 31. Cipriani A, Furukawa TA, Salanti G, et al. Comparative efficacy and acceptability of 12  
33 new-generation antidepressants: a multiple-treatments meta-analysis. *Lancet*. 2009;373:746-758.
- 34 32. Shamseer L, Moher D, Clarke M, et al. Preferred reporting items for systematic review and  
35 meta-analysis protocols (PRISMA-P) 2015: elaboration and explanation. *BMJ*. 2015;349:g7647.
- 36 33. Hutton B, Salanti G, Caldwell DM, et al. The PRISMA Extension Statement for Reporting of  
37 Systematic Reviews Incorporating Network Meta-analyses of Health Care Interventions: Checklist  
38 and Explanations. *Ann Intern Med*. 2015;162:777-784.
- 39 34. Merskey H, Bogduk N. Classification of chronic pain. Descriptions of chronic pain syndromes  
40 and definitions of pain terms, IASP Press, Seattle 1994, pp. 59-71.
- 41  
42  
43  
44  
45  
46  
47  
48  
49  
50  
51  
52  
53  
54  
55  
56  
57  
58  
59  
60

- 1
- 2
- 3 35. Zakrzewska JM. Diagnosis and differential diagnosis of trigeminal neuralgia. *Clin J Pain.* 2002;18:14-21.
- 4
- 5
- 6 36. Dworkin RH, Turk DC, Farrar JT, et al. Core outcome measures for chronic pain clinical trials: IMMPACT recommendations. *Pain.* 2005;113:9-19.
- 7
- 8
- 9 37. Ware JE Jr, Sherbourne CD. The MOS 36-item short-form health survey (SF-36). I. Conceptual framework and item selection. *Med Care.* 1992;30:473-483.
- 10
- 11
- 12 38. Qin Z, Li B, Wu J, et al. Acupuncture for chronic diarrhea in adults: protocol for a systematic review. *Medicine (Baltimore).* 2017;94:e5952.
- 13
- 14
- 15 39. Higgins JPT, Altman DG, Sterne JAC (editors). Chapter 8: Assessing risk of bias in included studies. In: Higgins JPT, Green S(editors). *Cochrane Handbook for Systematic Reviews of Intervention Version 5.1.0* [updated March 2011]. The Cochrane Collaboration, 2011. Available from [www.cochrane-handbook.org](http://www.cochrane-handbook.org).
- 16
- 17
- 18
- 19
- 20 40. Salanti G, Del Giovane C, Chaimani A, et al. Evaluating the quality of evidence from a network meta-analysis. *PLoS ONE.* 2014;9:e99682.
- 21
- 22
- 23 41. Furukawa TA, Cipriani A, Barbui C, Brambilla P, Watanabe N. Imputing response rates from means and standard deviations in meta-analyses. *Int Clin Psychopharmacol.* 2005;20:49-52.
- 24
- 25
- 26 42. Zhang J, Carlin B.P, Neaton J.D, et al. Network meta-analysis of randomized clinical trials: Reporting the proper summaries. *Clinical Trials.* 2014;11:246-262
- 27
- 28
- 29 43. Chaimani A, Higgins JPT, Mavridis D, Spyridonos P, Salanti G. Graphical tools for network meta-analysis in STATA. *PLoS One.* 2013;8:e76654.
- 30
- 31
- 32 44. Higgins JP, Thompson SG, Deeks JJ, Altman DG. Measuring inconsistency in meta-analyses. *BMJ.* 2003;327:557-560.
- 33
- 34
- 35 45. Baker SG, Kramer BS. The transitive fallacy for randomized trials: if A bests B and B bests C in separate trials, is A better than C? *BMC Med Res Methodol.* 2002;2:13.
- 36
- 37
- 38 46. White IR, Barrett JK, Jackson D, et al. Consistency and inconsistency in network meta-analysis: model estimation using multivariate meta-regression. *Res Synth Methods.* 2012;3:111-125
- 39
- 40
- 41
- 42 47. Higgins JPT, Jackson D, Barrett JL, et al. Consistency and inconsistency in network meta-analysis: concepts and models for multi-arm studies. *Res Synth Methods.* 2012;3:98-110
- 43
- 44
- 45 48. Dias S, Welton NJ, Caldwell DM, et al. Checking consistency in mixed treatment comparison meta-analysis. *Stat Med.* 2010;29:932-944
- 46
- 47
- 48 49. Lu G, Ades AE. Assessing evidence inconsistency in mixed treatment comparisons. *J Am Stat Assoc.* 2006;101:447-459.
- 49
- 50
- 51 50. Veroniki AA, Vasiliadis HS, Higgins JP, Salanti G. Evaluation of inconsistency in networks of interventions. *Int J Epidemiol.* 2013;42:332-345.
- 52
- 53
- 54
- 55
- 56
- 57
- 58
- 59
- 60

1  
2  
3 **Figure legends of figure:**  
4

5 Figure 1. Network plot of all possible direct comparisons between the eligible interventions.  
6

7 Figure 2. PRISMA flow chart.  
8  
9  
10  
11  
12  
13  
14  
15  
16  
17  
18  
19  
20  
21  
22  
23  
24  
25  
26  
27  
28  
29  
30  
31  
32  
33  
34  
35  
36  
37  
38  
39  
40  
41  
42  
43  
44  
45  
46  
47  
48  
49  
50  
51  
52  
53  
54  
55  
56  
57  
58  
59  
60

For peer review only



1  
2  
3  
4  
5  
6  
7  
8  
9  
10  
11  
12  
13  
14  
15  
16  
17  
18  
19  
20  
21  
22  
23  
24  
25  
26  
27  
28  
29  
30  
31  
32  
33  
34  
35  
36  
37  
38  
39  
40  
41  
42  
43  
44  
45  
46  
47  
48  
49  
50  
51  
52  
53  
54  
55  
56  
57  
58  
59  
60

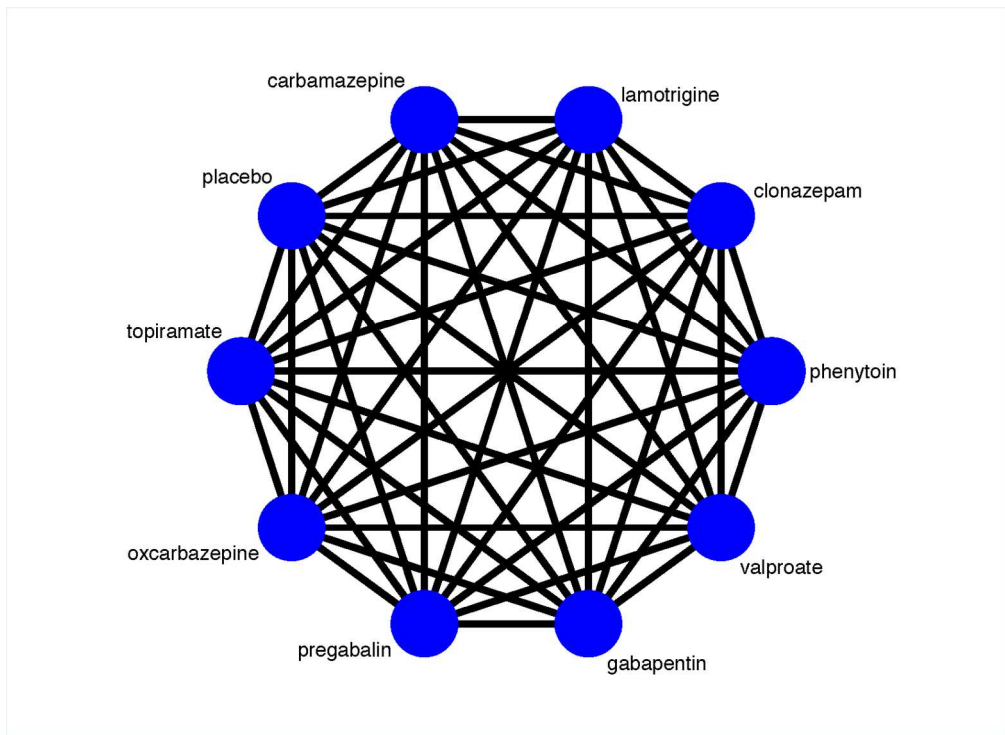

Network plot of all possible direct comparisons between the eligible interventions.

140x101mm (300 x 300 DPI)

Review only

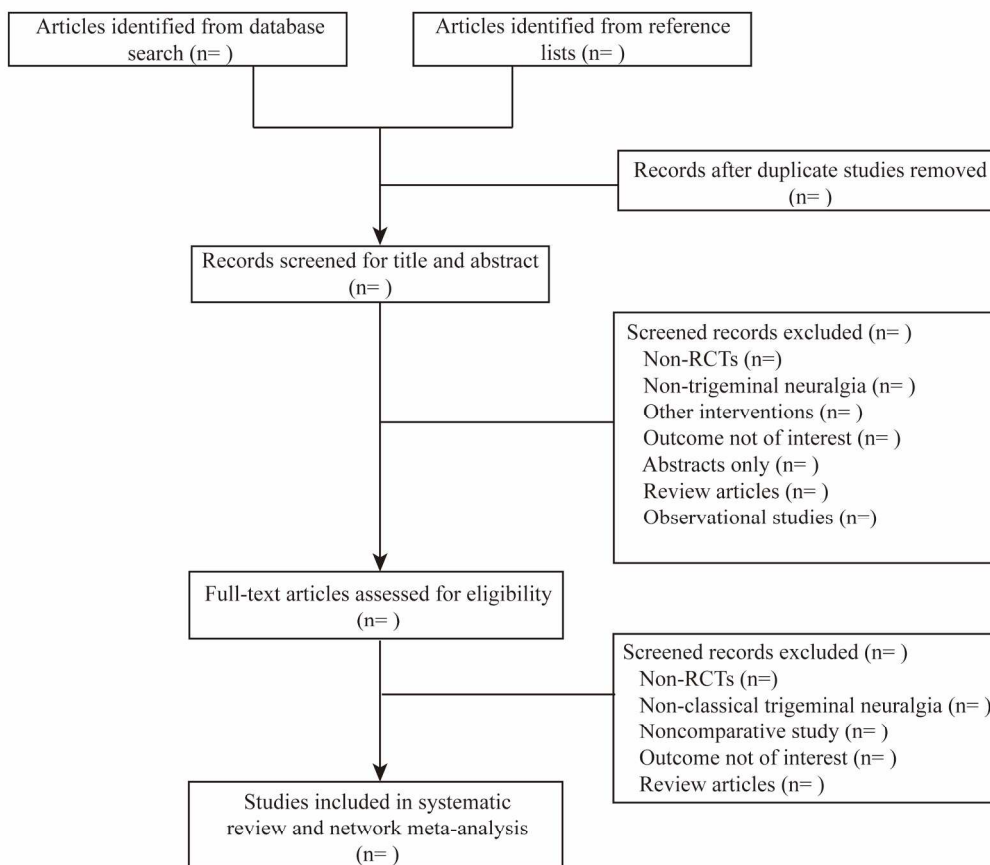

PRISMA flow chart

192x219mm (300 x 300 DPI)

**PRISMA-P (Preferred Reporting Items for Systematic review and Meta-Analysis Protocols) 2015 checklist: recommended items to address in a systematic review protocol\***

| Section and topic                 | Item No | Checklist item                                                                                                                                                                                                                                       |
|-----------------------------------|---------|------------------------------------------------------------------------------------------------------------------------------------------------------------------------------------------------------------------------------------------------------|
| <b>ADMINISTRATIVE INFORMATION</b> |         |                                                                                                                                                                                                                                                      |
| Title:                            |         |                                                                                                                                                                                                                                                      |
| Identification                    | 1a      | Identify the report as a protocol of a systematic review <a href="#">Page 1</a>                                                                                                                                                                      |
| Update                            | 1b      | If the protocol is for an update of a previous systematic review, identify as such <a href="#">NA</a>                                                                                                                                                |
| Registration                      | 2       | If registered, provide the name of the registry (such as PROSPERO) and registration number <a href="#">Page 2</a>                                                                                                                                    |
| Authors:                          |         |                                                                                                                                                                                                                                                      |
| Contact                           | 3a      | Provide name, institutional affiliation, e-mail address of all protocol authors; provide physical mailing address of corresponding author <a href="#">Page 1</a>                                                                                     |
| Contributions                     | 3b      | Describe contributions of protocol authors and identify the guarantor of the review <a href="#">Page 11</a>                                                                                                                                          |
| Amendments                        | 4       | If the protocol represents an amendment of a previously completed or published protocol, identify as such and list changes; otherwise, state plan for documenting important protocol amendments <a href="#">Page 11</a>                              |
| Support:                          |         |                                                                                                                                                                                                                                                      |
| Sources                           | 5a      | Indicate sources of financial or other support for the review <a href="#">Page 11</a>                                                                                                                                                                |
| Sponsor                           | 5b      | Provide name for the review funder and/or sponsor <a href="#">Page 11</a>                                                                                                                                                                            |
| Role of sponsor or funder         | 5c      | Describe roles of funder(s), sponsor(s), and/or institution(s), if any, in developing the protocol <a href="#">Page 11</a>                                                                                                                           |
| <b>INTRODUCTION</b>               |         |                                                                                                                                                                                                                                                      |
| Rationale                         | 6       | Describe the rationale for the review in the context of what is already known <a href="#">Page 3</a>                                                                                                                                                 |
| Objectives                        | 7       | Provide an explicit statement of the question(s) the review will address with reference to participants, interventions, comparators, and outcomes (PICO) <a href="#">Page 4</a>                                                                      |
| <b>METHODS</b>                    |         |                                                                                                                                                                                                                                                      |
| Eligibility criteria              | 8       | Specify the study characteristics (such as PICO, study design, setting, time frame) and report characteristics (such as years considered, language, publication status) to be used as criteria for eligibility for the review <a href="#">Page 4</a> |
| Information sources               | 9       | Describe all intended information sources (such as electronic databases, contact with study authors, trial registers or other grey literature sources) with planned dates of coverage <a href="#">Page 5</a>                                         |
| Search strategy                   | 10      | Present draft of search strategy to be used for at least one electronic database, including planned limits, such that it could be repeated <a href="#">Page 6</a>                                                                                    |
| Study records:                    |         |                                                                                                                                                                                                                                                      |
| Data management                   | 11a     | Describe the mechanism(s) that will be used to manage records and data throughout the review <a href="#">Page 6-7</a>                                                                                                                                |

|                                    |     |                                                                                                                                                                                                                                                                         |
|------------------------------------|-----|-------------------------------------------------------------------------------------------------------------------------------------------------------------------------------------------------------------------------------------------------------------------------|
| Selection process                  | 11b | State the process that will be used for selecting studies (such as two independent reviewers) through each phase of the review (that is, screening, eligibility and inclusion in meta-analysis) <a href="#">Page 6-7</a>                                                |
| Data collection process            | 11c | Describe planned method of extracting data from reports (such as piloting forms, done independently, in duplicate), any processes for obtaining and confirming data from investigators <a href="#">Page 6-7</a>                                                         |
| Data items                         | 12  | List and define all variables for which data will be sought (such as PICO items, funding sources), any pre-planned data assumptions and simplifications <a href="#">Page 6-7</a>                                                                                        |
| Outcomes and prioritization        | 13  | List and define all outcomes for which data will be sought, including prioritization of main and additional outcomes, with rationale <a href="#">Page 5-6</a>                                                                                                           |
| Risk of bias in individual studies | 14  | Describe anticipated methods for assessing risk of bias of individual studies, including whether this will be done at the outcome or study level, or both; state how this information will be used in data synthesis <a href="#">Page 7</a>                             |
| Data synthesis                     | 15a | Describe criteria under which study data will be quantitatively synthesised <a href="#">Page 7-8</a>                                                                                                                                                                    |
|                                    | 15b | If data are appropriate for quantitative synthesis, describe planned summary measures, methods of handling data and methods of combining data from studies, including any planned exploration of consistency (such as $I^2$ , Kendall's $\tau$ ) <a href="#">Page 8</a> |
|                                    | 15c | Describe any proposed additional analyses (such as sensitivity or subgroup analyses, meta-regression) <a href="#">Page 9-10</a>                                                                                                                                         |
|                                    | 15d | If quantitative synthesis is not appropriate, describe the type of summary planned <a href="#">Page 9-10</a>                                                                                                                                                            |
| Meta-bias(es)                      | 16  | Specify any planned assessment of meta-bias(es) (such as publication bias across studies, selective reporting within studies) <a href="#">Page 7</a>                                                                                                                    |
| Confidence in cumulative evidence  | 17  | Describe how the strength of the body of evidence will be assessed (such as GRADE) <a href="#">Page 7</a>                                                                                                                                                               |

**\* It is strongly recommended that this checklist be read in conjunction with the PRISMA-P Explanation and Elaboration (cite when available) for important clarification on the items. Amendments to a review protocol should be tracked and dated. The copyright for PRISMA-P (including checklist) is held by the PRISMA-P Group and is distributed under a Creative Commons Attribution Licence 4.0.**

*From: Shamseer L, Moher D, Clarke M, Ghersi D, Liberati A, Petticrew M, Shekelle P, Stewart L, PRISMA-P Group. Preferred reporting items for systematic review and meta-analysis protocols (PRISMA-P) 2015: elaboration and explanation. BMJ. 2015 Jan 2;349(jan02 1):g7647.*

## PubMed

### Patient

#1 "Trigeminal Neuralgia"[Mesh]

#2 Trigeminal Neuralgia\*[Title/Abstract] OR Trifacial Neuralgia\*[Title/Abstract] OR Fothergill Disease[Title/Abstract] OR Tic Douloureux[Title/Abstract] OR Epileptiform Neuralgia\*[Title/Abstract] OR trigeminus neuralgia[Title/Abstract] OR prosopalgia[Title/Abstract] OR prosoponeuralgia[Title/Abstract] OR trigeminal nerve neuralgia[Title/Abstract] OR trigeminal nerve neuropathy[Title/Abstract] OR trigeminal neuropathy[Title/Abstract] OR trigeminus nerve neuralgia[Title/Abstract] OR trigeminus nerve neuropathy[Title/Abstract]

#3 #1 OR #2

### RCT

#4 "Clinical Trials, Phase II as Topic"[Mesh] OR "Clinical Trials, Phase III as Topic"[Mesh] OR "Clinical Trials, Phase IV as Topic"[Mesh] OR "Controlled Clinical Trials as Topic"[Mesh] OR "Randomized Controlled Trials as Topic"[Mesh] OR "Intention to Treat Analysis"[Mesh] OR "Pragmatic Clinical Trials as Topic"[Mesh] OR "Clinical Trials, Phase II"[Publication Type] OR "Clinical Trials, Phase III"[Publication Type] OR "Clinical Trials, Phase IV"[Publication Type] OR "Controlled Clinical Trials"[Publication Type] OR "Randomized Controlled Trials"[Publication Type] OR "Pragmatic Clinical Trials as Topic"[Publication Type] OR "Single-Blind Method"[Mesh] OR "Double-Blind Method"[Mesh]

#5 random\*[Title/Abstract] OR blind\*[Title/Abstract] OR singleblind\*[Title/Abstract] OR doubleblind\*[Title/Abstract] OR trebleblind\*[Title/Abstract] OR tripleblind\*[Title/Abstract]

#6 #4 OR #5

#7 #3 AND #6

## EMBASE.com

### Patient

#1 'trigeminus neuralgia'/exp

#2 'trigeminal neuralgias':ab,ti OR 'trifacial neuralgias':ab,ti OR 'trigeminal neuralgia':ab,ti OR 'trifacial neuralgia':ab,ti OR 'fothergill disease':ab,ti OR 'tic douloureux':ab,ti OR 'epileptiform neuralgia':ab,ti OR 'epileptiform neuralgias':ab,ti OR 'trigeminus neuralgia':ab,ti OR prosopalgia:ab,ti OR prosoponeuralgia:ab,ti OR 'trigeminal nerve neuralgia':ab,ti OR 'trigeminal nerve neuropathy':ab,ti OR 'rigeminal neuropathy':ab,ti OR 'trigeminus nerve neuralgia':ab,ti OR 'trigeminus nerve neuropathy':ab,ti

#3 #1 OR #2

### RCT

#4 'multicenter study (topic)'/exp OR 'phase 2 clinical trial (topic)'/exp OR 'phase 3 clinical trial

(topic)/exp OR 'phase 4 clinical trial (topic)/exp OR 'controlled clinical trial (topic)/exp OR 'randomized controlled trial (topic)/exp OR 'single blind procedure'/exp OR 'double blind procedure'/exp

#5 random\*:ab,ti OR blind\*:ab,ti OR singleblind\*:ab,ti OR doubleblind\*:ab,ti OR trebleblind\*:ab,ti OR tripleblind\*:ab,ti

#6 #4 OR #5

#7 #3 AND #6

## Cochrane Library

#1 MeSH descriptor: [Trigeminal Neuralgia] explode all trees

#2 Trigeminal Neuralgia\*:ti,ab,kw or Trifacial Neuralgia\*:ti,ab,kw or Fothergill Disease:ti,ab,kw or Tic Douloureux:ti,ab,kw or Epileptiform Neuralgia\*:ti,ab,kw or trigeminus neuralgia:ti,ab,kw or prosopalgia:ti,ab,kw or prosoponeuralgia:ti,ab,kw or trigeminal nerve neuralgia:ti,ab,kw or trigeminal nerve neuropathy:ti,ab,kw or trigeminal neuropathy:ti,ab,kw or trigeminus nerve neuralgia:ti,ab,kw or trigeminus nerve neuropathy:ti,ab,kw

#3 #1 or #2

# BMJ Open

## Comparative Efficacy and Acceptability of Antiepileptic Drugs for Classical Trigeminal Neuralgia: A Bayesian Network Meta-Analysis Protocol

|                                 |                                                                                                                                                                                                                                                                                                                                                                                                                                                                                                                                                                                                                                                                                                                                                                                                                                                                                                                                                                                                                                                                              |
|---------------------------------|------------------------------------------------------------------------------------------------------------------------------------------------------------------------------------------------------------------------------------------------------------------------------------------------------------------------------------------------------------------------------------------------------------------------------------------------------------------------------------------------------------------------------------------------------------------------------------------------------------------------------------------------------------------------------------------------------------------------------------------------------------------------------------------------------------------------------------------------------------------------------------------------------------------------------------------------------------------------------------------------------------------------------------------------------------------------------|
| Journal:                        | <i>BMJ Open</i>                                                                                                                                                                                                                                                                                                                                                                                                                                                                                                                                                                                                                                                                                                                                                                                                                                                                                                                                                                                                                                                              |
| Manuscript ID                   | bmjopen-2017-017392.R2                                                                                                                                                                                                                                                                                                                                                                                                                                                                                                                                                                                                                                                                                                                                                                                                                                                                                                                                                                                                                                                       |
| Article Type:                   | Protocol                                                                                                                                                                                                                                                                                                                                                                                                                                                                                                                                                                                                                                                                                                                                                                                                                                                                                                                                                                                                                                                                     |
| Date Submitted by the Author:   | 29-Aug-2017                                                                                                                                                                                                                                                                                                                                                                                                                                                                                                                                                                                                                                                                                                                                                                                                                                                                                                                                                                                                                                                                  |
| Complete List of Authors:       | <p>Qin, Zongshi; Guang'anmen Hospital, China Academy of Chinese Medical Sciences, Department of Acupuncture and Neurology</p> <p>Xie, Shang; Peking University School and Hospital of Stomatology, Department of Oral and Maxillofacial Surgery</p> <p>Mao, Zhi; Chinese People's Liberation Army General Hospital, Department of Critical Care Medicine</p> <p>Liu, Yan; China Academy of Chinese Medical Sciences, Data Centre of Traditional Chinese Medicine</p> <p>WU, Jiani; Guang'anmen Hospital, China Academy of Chinese Medical Sciences, Department of Acupuncture and Neurology</p> <p>Furukawa, Toshi; Kyoto University, Graduate School of Medicine and School of Public Health</p> <p>Kwong, Joey; Taipei Medical University, Cochrane Taiwan; National Center for Child Health and Development, Department of Health Policy &amp; Department of Clinical Epidemiology</p> <p>Tian, Jinhui; Evidence based medicine center,</p> <p>Liu, Zhishun; Guang'anmen Hospital, China Academy of Chinese Medical Sciences, Department of Acupuncture and Neurology</p> |
| <b>Primary Subject Heading</b>: | Evidence based practice                                                                                                                                                                                                                                                                                                                                                                                                                                                                                                                                                                                                                                                                                                                                                                                                                                                                                                                                                                                                                                                      |
| Secondary Subject Heading:      | Neurology                                                                                                                                                                                                                                                                                                                                                                                                                                                                                                                                                                                                                                                                                                                                                                                                                                                                                                                                                                                                                                                                    |
| Keywords:                       | antiepileptic drugs, trigeminal neuralgia, network meta-analysis, systematic review, protocol                                                                                                                                                                                                                                                                                                                                                                                                                                                                                                                                                                                                                                                                                                                                                                                                                                                                                                                                                                                |
|                                 |                                                                                                                                                                                                                                                                                                                                                                                                                                                                                                                                                                                                                                                                                                                                                                                                                                                                                                                                                                                                                                                                              |

SCHOLARONE™  
Manuscripts

1  
2  
3 **Comparative Efficacy and Acceptability of Antiepileptic Drugs for Classical**  
4 **Trigeminal Neuralgia: A Bayesian Network Meta-Analysis Protocol**  
5  
6  
7

8  
9 Zongshi Qin,<sup>1</sup> Shang Xie<sup>2</sup>, Zhi Mao<sup>3</sup>, Yan Liu<sup>4</sup>, Jiani Wu<sup>1</sup>, Toshi A Furukawa<sup>5</sup>, Joey S.W.  
10 Kwong<sup>6,7</sup>, Jinhui Tian<sup>8</sup>, Zhishun Liu<sup>1</sup>

11  
12 <sup>1</sup> Department of Acupuncture and Neurology, Guang'anmen Hospital, China Academy of Chinese  
13 Medical Sciences, Beijing, China  
14

15  
16 <sup>2</sup> Department of Oral and Maxillofacial Surgery, Peking University School and Hospital of  
17 Stomatology, Beijing, China  
18

19  
20 <sup>3</sup> Department of Critical Care Medicine, Chinese People's Liberation Army General Hospital,  
21 Beijing, China  
22

23  
24 <sup>4</sup> Data Centre of Traditional Chinese Medicine, China Academy of Chinese Medical Sciences,  
25 Beijing, China  
26

27  
28 <sup>5</sup> Department of Health Promotion and Human Behavior, Kyoto University Graduate School of  
29 Medicine/School of Public Health, Kyoto, Japan  
30

31  
32 <sup>6</sup> Cochrane Taiwan, Taipei Medical University, Taipei, Taiwan  
33

34  
35 <sup>7</sup> Department of Health Policy & Department of Clinical Epidemiology, National Center for Child  
36 Health and Development, Tokyo, Japan  
37

38  
39 <sup>8</sup> Evidence-based Medicine Center, Lanzhou University, Lanzhou, China

40 ZQ, SX and ZM contributed equally to this work.

41 Correspondence to: Jinhui Tian, email: tianjh@lzu.edu.cn; Zhishun Liu, email:

42 liuzhishun@aliyun.com  
43

44  
45 Keywords: antiepileptic drugs; trigeminal neuralgia; network meta-analysis; systematic review;  
46 protocol  
47  
48  
49  
50  
51  
52  
53  
54  
55  
56  
57  
58  
59  
60



## ABSTRACT

**Introduction** Trigeminal neuralgia (TN) affects 4 to 28.9/100,000 people worldwide, and antiepileptic drugs such as carbamazepine and oxcarbazepine are the first-line treatment options. However, the efficacy and safety of other antiepileptic drugs remain unclear due to insufficient direct comparisons.

**Objective** To compare the efficacy and acceptability of all currently available antiepileptic agents for the treatment of patients with classical TN.

**Methods** We will search the PubMed, EMBASE, Cochrane Library, and Web of Science databases for unpublished or undergoing research listed in registry platforms. We will include all randomized controlled trials comparing two different antiepileptic drugs or one antiepileptic drug with placebo in patients with classic TN. The primary outcomes will be the proportion of responders and the number of subjects who drop out during the treatment. The secondary outcomes include the two primary outcomes but set in the follow-up period, changes in the self-reporting assessment scale for neuralgia, and quality of life assessment. In terms of network meta-analysis, we will fit our model in a Bayesian framework using WinBUGS (Medical Research Council's Biostatistics Unit, Cambridge, UK). To confirm the results, we will also conduct analyses using Stata (Version 13.0; Stata Corporation, College Station, Texas, USA) and compare the differences between the two platforms.

**Ethics and dissemination** This protocol will not disseminate any private patient data. The results of this review will be disseminated through peer-reviewed publication.

**Protocol registration for this systematic review (registration number):** PROSPERO (CRD: 42016048640).

### Strengths and limitations of this study

- To the best of the authors' knowledge, this study will be the first network meta-analysis that assess the comparative efficacy and acceptability of all the available antiepileptic drugs for the classical trigeminal neuralgia.
- This study will be performed by Bayesian framework, which enables us to estimate the probability for each intervention to be the best for each outcome.
- Owing to the language barrier, the amount of included trials might be potentially limited.

### Introduction

Classical trigeminal neuralgia (TN), a chronic pain disorder described as one of the most severe pains one can suffer, is characterized by paroxysms of unilateral, electric shock-like, and severe pain along the trigeminal nerve divisions.<sup>1,2</sup> It affects lifestyle because it can be triggered by common activities such as eating, talking, shaving and brushing teeth. The wind, chewing and talking also aggravate the condition in many patients.<sup>2</sup> It is estimated that approximately 4 to 28.9 per 100,000 people worldwide suffer from TN, and the number affected tends to be higher among women at all ages and even increases with age.<sup>3,4</sup>

At present, the cause of TN remains unclear.<sup>5,6</sup> One hypothesis is that the trigeminal nerve becomes compressed at the root entry zone by cerebral vessels.<sup>7</sup> Owing to the contradictory etiology and poorly understood pathophysiological mechanisms underlying TN, a variety of therapeutic and surgical approaches have been developed to alleviate the associated pain and improve the quality of life in patients with classical TN.<sup>8-10</sup> Although many patients have obtained excellent outcomes from surgery, many others do not experience any pain relief.<sup>11,12</sup> Furthermore, the currently available surgical procedures are associated with various complications, particularly sensory loss in the trigeminal nerve territory, anesthesia dolorosa and, rarely, ipsilateral hearing loss, depending on the technique.<sup>13,14</sup>

As such, pharmacological measures to improve clinical outcomes are needed. The most commonly used option is antiepileptic drugs, with phenytoin being the first drug used for classical TN with positive effect.<sup>15</sup> Carbamazepine can reduce both the frequency and intensity of painful paroxysms and was first introduced by the US Food and Drug Administration (FDA); however, its efficacy is compromised by poor tolerability.<sup>16</sup> Oxcarbazepine, a derivative of carbamazepine, is often used as an initial treatment for classical TN and has more favorable properties than carbamazepine related to its increased efficacy in epilepsy, greater tolerability and decreased potential for drug interactions.<sup>17</sup> Lamotrigine has also been reported as an effective add-on therapy,<sup>18</sup> whereas little evidence supports that other antiepileptic drugs such as clonazepam, gabapentin, pregabalin and valproate have a beneficial effect.<sup>19-22</sup> However, many of the studies are old with limited methodology, and were assessed as low GRADE scores.<sup>23</sup>

To date, several systematic reviews have investigated the comparative efficacy and safety of antiepileptic drugs.<sup>20,24-28</sup> However, previous systematic reviews have only considered pair-wise

1  
2  
3 evidence from head-to-head comparisons and have thus failed to assess the comparative efficacy  
4 and acceptability of all available antiepileptic drugs. Thus, it is difficult to determine the best  
5 treatments for relieving pain with minimal adverse effects. In the present study, we choose a group  
6 of 9 antiepileptic drugs looking at the drugs which were licensed for neuralgia in many countries  
7 and which were frequently used in clinical practice. We will apply network meta-analysis to  
8 integrate direct and indirect comparisons,<sup>29,30</sup> which could be used not only to strengthen  
9 inferences concerning the efficacy and acceptability of treatments but also to rank the efficacy and  
10 acceptability of antiepileptic drugs accordingly.<sup>31</sup>

11  
12 The objectives of this systematic review and network meta-analysis are 1) to compare all currently  
13 available antiepileptic drugs in terms of efficacy and acceptability in classical TN treatment and 2)  
14 to determine which drug achieves the best balance between efficacy and adverse effects. The  
15 results of this study will augment findings based on current pair-wise meta-analyses and are  
16 expected to provide important information to support clinical practice and health policy decisions.  
17  
18

## 19 20 21 22 23 24 25 26 27 28 29 30 **METHODS**

31 This protocol will be conducted in accordance with the reporting guidance provided in the  
32 Preferred Reporting Items for Systematic Reviews and Meta-Analysis Protocols (PRISMA-P)  
33 statement and Checklist of Items to Include When Reporting a Systematic Review Involving a  
34 Network Meta-analysis.<sup>32,33</sup> The protocol is registered in PROSPERO (CRD: 42016048640). This  
35 study will not involve any private patient data, ethical approval was waived. (supplemental file 1  
36 represents the PRISMA-P checklist)  
37  
38  
39  
40  
41  
42  
43  
44

### 45 **Eligibility criteria**

#### 46 **Study types**

47 We will include randomized controlled trials (RCTs) comparing one antiepileptic drug with  
48 another antiepileptic drug as monotherapy or placebo for the treatment of TN. Quasi-randomized  
49 controlled trails allocating participants according to birth date or the consequences of enrollment  
50 will be excluded. The minimum duration for RCT inclusion was set at 4 weeks. Trials with more  
51 than a two-arm design will be considered only if the available data meet the criteria for an  
52 intervention. For trials with a crossover design, data will only be extracted from the first  
53  
54  
55  
56  
57  
58  
59  
60

1  
2  
3 randomization period.  
4  
5  
6

#### 7 Participant characteristics

8  
9 Only trials that enrolled participants with a diagnosis of classical TN according to standardized  
10 criteria such as the classification of the International Headache Society (IHS) of International  
11 Classification of Headache Disorders will be sought.<sup>1,34</sup> For studies using other extensive criteria  
12 for the diagnosis of classical TN, detailed diagnostic criteria must be reported (such as history or  
13 characteristics that have been confirmed by CT or MRI).<sup>35</sup> Studies examining symptomatic TN  
14 patients will not be included. Participants with comorbid conditions such as anxiety, depression,  
15 epilepsy or other medical conditions will also not be eligible for inclusion. No limitations will be  
16 imposed for age, sex, or nationality.  
17  
18  
19  
20  
21  
22  
23

#### 24 Intervention types

25  
26 We plan to include the following antiepileptic drugs: carbamazepine, lamotrigine, clonazepam,  
27 phenytoin, valproate, gabapentin, pregabalin, oxcarbazepine and topiramate. In addition to these  
28 antiepileptic drugs, we will also obtain information about interventions of interest from either  
29 pair-wise RCTs or placebo-controlled trials, as some RCTs design a placebo-controlled arm as the  
30 comparator. Figure 1 illustrates the network plot of all possible direct comparisons between the  
31 eligible interventions.  
32  
33  
34  
35  
36  
37  
38  
39  
40

#### 41 Outcome measures

42 Studies reporting one of the following will be included.

#### 43 Primary outcome

44  
45 The primary objective of this review is to assess the efficacy and acceptability of antiepileptic  
46 drugs for classical TN; therefore, the following two outcomes will be used as the primary  
47 outcome.  
48  
49  
50

51  
52 1. The proportion of responders to a self-reporting assessment scale for neuralgia. A responder was  
53 defined as a subject who obtained a  $\geq 50\%$  pain reduction score from baseline to endpoint (4–12  
54 weeks) or a subject who obtained a pain reducing score of no less than the minimal clinically  
55 important difference (MCID). Pain scores will be extracted based on the visual analogue score  
56  
57  
58  
59  
60

1  
2  
3 (VAS), numerical rating score (NRS), or any other validated scale for the assessment of overall  
4 TN symptoms when available.<sup>36</sup>  
5

6  
7 2. Treatment acceptability is defined as the proportion of patients who have intervention related  
8 adverse events during the 4 to 12 weeks.  
9

#### 10 Secondary outcomes

11  
12 1. The proportion of responders with  $\geq 50\%$  pain reduction on a self-reporting assessment scale  
13 for neuralgia from baseline to endpoint after follow-up.  
14

15  
16 2. The change in pain symptoms of TN from baseline to endpoint (4–12 weeks) measured based  
17 on the VAS, NRS, or any other validated scale for the assessment of overall TN symptoms when  
18 available.  
19

20  
21 3. The change in pain symptoms of TN from baseline to endpoint after follow-up.  
22

23  
24 4. The quality of life based on measurement with a validated scale, such as the Short Form 36  
25 Health Survey questionnaire (SF-36).<sup>37</sup>  
26

#### 27 28 29 30 **Search strategy**

31 We will identify RCTs through a comprehensive, systematic literature search primarily utilizing  
32 the PubMed, EMBASE, Cochrane Library, and Web of Science databases. As publication bias  
33 caused by insufficient unpublished data can significantly bias the comparative efficacy results of  
34 network meta-analysis and modify rankings, we will also perform searches for unpublished or  
35 ongoing trials using System for information on Grey Literature in Europe (SIGLE) as well as  
36 other registry platforms, such as Clinicaltrials.gov and the International Clinical Trials Registry  
37 Platform. Prior to completing this review, we will perform an additional search of each database  
38 and registration platform to guarantee that the most recent studies are included. We will use  
39 medical subject headings and text words related to ‘trigeminal neuralgia’ and ‘randomized  
40 controlled trial’ for the literature search. In addition, the reference lists of previous systematic  
41 reviews will be examined to ensure the quantity and accuracy of the included studies. The search  
42 strategy will be developed by JT and ZL, we anticipate that the aforementioned databases will be  
43 searched from their inception to 30<sup>th</sup> September, 2017. (supplemental file 2 represents the search  
44 strategies for PubMed, EMBASE and Cochrane Library)  
45  
46  
47  
48  
49  
50  
51  
52  
53  
54  
55  
56  
57  
58  
59  
60

### **Data collection process**

Two authors (SX and ZM) will scan the titles and abstracts of the trials after duplicated records have been excluded using EndNote X7 (Thomson Reuters, New York, NY). The scanning will be performed using EndNote, and all trials will be allocated to the following five groups: inclusion group, non-patient group, intervention group, outcome group, and awaiting group. A prior data collection process will be conducted using an electro-table created with Excel software, which has been used in our previous study.<sup>38</sup> The table will consist of four sheets, including general information (author list, publication year, and journal), characteristics of included trials (diagnostic criteria, age range, study drugs, and dose range), the risk of bias assessed using the Cochrane risk of bias tool, and outcome data extraction (number of participants who responded to treatment and the number who dropped out during the treatment). All original data will be submitted as an attachment. A flow chart illustrating this design is presented in Figure 2.

### **Quality assessment**

Two authors (JW and YL) will use the Cochrane risk of bias tool to assess the risk of bias of eligible studies, covering randomization, concealment allocation, blinding and other biases.<sup>39</sup> As inadequate concealment could potentially fail the randomization test, two independent review authors will pay particular attention to the adequacy of random allocation concealment and blinding. The other sources of bias will be assessed while considering sample size calculation method, diagnostic criteria, reporting of withdrawals and follow-up. Two authors (JK and JT) will assess the quality of evidence using Grading of Recommendations Assessment, Development and Evaluation (GRADE) framework, covering study limitations, inconsistency, indirectness, imprecision and publication bias.<sup>40</sup> The methods for rating the quality of direct comparisons are the same to the methods used in traditional meta-analysis, and following steps will be used in the whole assessment procedure: 1) presenting direct and indirect effect estimates; 2) rating the quality of direct and indirect estimates; 3) presenting the results of network meta-analysis; 4) rating the quality of network meta-analysis effect estimates.

### **Dealing with missing data**

To obtain missing data, we will initially contact the senior or corresponding author. If no one

1  
2  
3  
4  
5  
6  
7  
8  
9  
10  
11  
12  
13  
14  
15  
16  
17  
18  
19  
20  
21  
22  
23  
24  
25  
26  
27  
28  
29  
30  
31  
32  
33  
34  
35  
36  
37  
38  
39  
40  
41  
42  
43  
44  
45  
46  
47  
48  
49  
50  
51  
52  
53  
54  
55  
56  
57  
58  
59  
60

responds, we will estimate the missing data as follows. For studies failing to report the number of responding patients after treatment, instead of providing the mean and standard deviation, we will calculate the number of responding patients employing a validated imputation method.<sup>41</sup> In addition, we will also estimate missing data from graphs when possible. For trials that cannot be extracted or estimated, the available data will be excluded, and the reason for exclusion will be reported.

### Statistical analysis

The method used for data synthesis will be based on mixed treatment meta-analysis. To examine comparisons, we will use Stata (Version 13.0; Stata Corporation, College Station, Texas, USA) to synthesize data and will present the comparison results if the included studies are sufficient for each pair-wise comparison. We will use a random effects model to combine the data, and the outcomes of continuous and binary variables will be presented as standardized mean differences (SMDs) and odds ratios (ORs) with 95% confidential intervals (CIs). For indirect comparisons, network meta-analysis will be developed in a Bayesian framework using Markov chain Monte Carlo simulation methods in WinBUGS (Medical Research Council's Biostatistics Unit, Cambridge, UK) with a Chaimani model.<sup>42</sup> The results of network meta-analysis will use the arm-based parameterization for random effects model.<sup>43</sup> This will enable us to estimate the best probability for each intervention for each positive outcome, given the results of the multiple-treatment meta-analysis. At least one network focusing on the response rate for pain relief will be constructed, in which a statistically significant difference defined as the null value will not be included in the 95% CI. The Markov chains will be utilized for 50,000 simultaneous iterations based on the data and the description of the proposed distributions for relevant parameters, and the first 10,000 iterations will be discarded to avoid potential impact on the arbitrary value. For continuous outcomes and binary outcomes, the OR and SMD will be presented with the 95% credible interval (CrI). In this process, the Brooks-Gelman-Rubin method will be used to assess the convergence between direct and indirect variances. According to the theory of Brooks and Gelman, if a potential scale reduction factor (PSRF) is less than 1.2, then an approximate convergence has occurred. The PSRF results will be presented graphically using a Brooks-Gelman-Rubin diagnosis plot, if needed. To describe relationships among different

1  
2  
3 treatments, a network plot will be created to show direct comparisons between arms based on  
4 different outcomes. To confirm the results, we will also conduct the same network meta-analysis  
5 using the network package of Stata ([http://www.mrc-bsu.cam.ac.uk/IW\\_Stata/](http://www.mrc-bsu.cam.ac.uk/IW_Stata/)), and the outcome  
6 will be compared to that produced using WinBUGS. In addition, the effectiveness of each  
7 treatment among all available treatments will be ranked by calculating the OR in order, and plots  
8 of the surfaces under the cumulative ranking curves (SUCRAs) will be generated to rank the  
9 various treatments for each outcome using Stata software.<sup>44</sup> We will also present a cluster rank  
10 table to synthesize the efficacy and acceptability of each drug (using two primary outcomes). The  
11 table will consist of two triangles: the upper right triangle will illustrate the acceptability, and the  
12 lower left triangle will illustrate the efficacy.<sup>31</sup>

### 23 **Assessment of heterogeneity**

24 Heterogeneity, which plays a pivotal role in both standard meta-analysis and network  
25 meta-analysis, refers to the degree of disagreement between study-specific treatment effects and  
26 constitutes the basis of inconsistency. To test the heterogeneity of each pair-wise comparison, we  
27 will use the  $I^2$  statistic.<sup>45</sup>

### 33 **Assessment of transitivity and similarity**

34 In addition to the heterogeneity assessment using the  $I^2$  statistic, the assumption of transitivity and  
35 similarity based on clinical and methodological characteristics will be assessed. It should be noted  
36 that it is difficult to identify these effect modifiers using statistical analysis. We will assume that  
37 intervention effects are transitive in this network meta-analysis because we will only focus on  
38 antiepileptic drugs, and we will investigate similarity based on clinical characteristics, such as  
39 antiepileptic drug dose, period of treatment, and severity of pain symptoms at baseline, as well as  
40 according to methodological characteristics such as study quality.<sup>46</sup> All these effect modifiers will  
41 be judged and reported before the network meta-analysis is conducted.

### 52 **Assessment of inconsistency**

53 The evaluation and explanation of inconsistency is another basic objective of network  
54 meta-analysis. In this context, inconsistency refers to the degree of difference between direct and  
55 indirect comparisons and can be evaluated only when a loop exists in the evidence network. This  
56  
57  
58  
59  
60



1  
2  
3 means that inconsistency assessment using a design-by-treatment interaction model cannot be  
4 conducted if the structure of this network is a “star network” (i.e., all interventions have a single  
5 mutual comparator, such as a placebo).<sup>47,48</sup> For such cases, we will test inconsistency using a  
6 node-splitting model.<sup>49</sup>

7  
8  
9  
10 To identify inconsistency among the included trials of the network, we will use Stata, performing  
11 the Z test to compare direct and indirect summary effects in specific loops.<sup>50</sup> If there is no  
12 inconsistency between loops or designs, we will use a consistency model to calculate the data. For  
13 cases of significant incoherence, we will initially look for data extraction errors in loops that  
14 present inconsistency and in comparisons with large heterogeneity.<sup>51</sup> After the data have been  
15 scrutinized, we will investigate possible sources of inconsistency within clinical and  
16 methodological variables suspected of being potential sources of either heterogeneity or  
17 incoherence in each comparison-specific group of trials. If an important inconsistency cannot be  
18 explained, we will consider avoiding synthesis of the related network.  
19  
20  
21  
22  
23  
24  
25  
26  
27  
28  
29

### 30 **Additional analyses**

31 To ensure the quality of this review, studies not reporting blinding will be excluded prior to data  
32 synthesis because blinding plays a vital important role in the randomized controlled trial. We will  
33 assess heterogeneity quantitatively using the I<sup>2</sup> statistic, and if an I<sup>2</sup> value is greater than 50%, then  
34 we will explore the source of heterogeneity. We will initially perform sensitivity analysis by  
35 excluding trials rated as having a high risk of bias. Additionally, meta-regression or subgroup  
36 analysis will be used to explore possible sources of heterogeneity if the number of included trials  
37 is sufficient. For network meta-regression, we will use a random effects network meta-regression  
38 model to examine potential factors.  
39  
40  
41  
42  
43  
44  
45  
46  
47  
48

### 49 **Discussion**

50 To the best of our knowledge, no network meta-analyses comparing the use of antiepileptic drugs  
51 for treatment of classical TN have been conducted to date. Previous systematic reviews have  
52 compared only a single drug to other types of drug or therapy.<sup>20,24-28</sup> This makes it difficult to  
53 obtain a clear understanding of the effectiveness of the various different conservative treatments  
54 for this disorder. Network meta-analysis can be used to perform indirect comparisons and allows  
55  
56  
57  
58  
59  
60

1  
2  
3 parameters for direct and indirect comparisons to be synthesized. To ensure the quantity and  
4 quality of the potentially included RCTs, we will perform an extensive literature search and  
5 predefine rigorous inclusion criteria. Besides, we will assess the quality of evidence with the  
6 GRADE framework. Although a ranking of the included interventions will be generated, with the  
7 exception of findings, the quality of evidence should also be considered. We hope that the results  
8 of this review help clinicians make more accurate treatment decisions and promote additional  
9 research into conservative treatments for classical TN.  
10  
11  
12  
13  
14  
15  
16  
17  
18  
19  
20  
21  
22  
23  
24  
25  
26  
27  
28  
29  
30  
31  
32  
33  
34  
35  
36  
37  
38  
39  
40  
41  
42  
43  
44  
45  
46  
47  
48  
49  
50  
51  
52  
53  
54  
55  
56  
57  
58  
59  
60

**Amendments**

If it is necessary to update this protocol, we will update this protocol in the future. We will submit the original protocol, final protocol and summary of changes as a supplement.

**Authors' contributions**

ZQ, SX, and ZM conceived of the study. JT and SX developed the search strategies. ZQ, JT and SX wrote the first draft. TAF and ZL revised the draft. SX and ZM will independently screen potential studies and extract data from the included studies. JW, JK, JT and YL will assess the risk of bias and summarize the evidence. ZM, SX, JK and ZL will address the missing data, if any. ZQ and JT will perform the statistical analysis. ZL and JT will arbitrate in cases of disagreement and ensure the absence of errors. All authors approve the publication of this protocol.

**Ethics and dissemination**

This protocol will not disseminate any private patient data. The results of this review will be disseminated through peer-reviewed publication.

**Competing interests:** None.

**Funding:** None.

**Reference**

1. Headache Classification Committee of the International Headache Society (IHS). The International Classification of Headache Disorders, 3rd edition (beta version). *Cephalalgia*. 2013;33:629-808.
2. Zakrzewska JM, Linskey ME. Trigeminal neuralgia. *BMJ*. 2015;350:h1238
3. Meller D, Obermann M, Yoon MS, Poitz F, Hansen N, Slomke MA. Prevalence of trigeminal neuralgia and persistent idiopathic facial pain: a population-based study. *Cephalalgia*. 2011;31:1542-1548.
4. MacDonald BK, Cockerell OC, Sander JW, Shorvon SD. The incidence and lifetime prevalence of neurological disorders in a prospective community-based study in the UK. *Brain*. 2000;123:665-676.
5. Devor M, Amir R, Rappaport ZH. Pathophysiology of trigeminal neuralgia: the ignition hypothesis. *Clin J Pain*. 2002;18:4-13.
6. Danielle DD, Hodaie M, Davis KD. Structural magnetic resonance imaging can identify trigeminal system abnormalities in classical trigeminal neuralgia. *Front Neuroanat*. 2016;10:95.
7. Katusic S, Beard CM, Bergstralh E, Kurland LT. Incidence and clinical features of trigeminal neuralgia, Rochester, Minnesota, 1945-1984. *Ann Neurol*. 1990;27:89-95.
8. Gronseth G, Cruccu G, Alksne J, et al. Practice parameter: the diagnostic evaluation and treatment of trigeminal neuralgia (an evidence-based review): report of the Quality Standards Subcommittee of the American Academy of Neurology and the European Federation of Neurological Societies. *Neurology*. 2008;71:1183-1190.
9. Campbell FG, Graham JG, Zilkha KJ. Clinical trial of carbamazepine (tegretol) in trigeminal neuralgia. *J Neurol Neurosurg Psychiatry*. 1966;29:265-267.
10. Fromm GH, Terrence CF, Chattha AS. Baclofen in the treatment of trigeminal neuralgia: double-blind study and long-term follow-up. *Ann Neurol*. 1984;15:240-244.
11. Zakrzewska JM, Lopez BC, Kim SE, Coakham HB. Patient reports of satisfaction after microvascular decompression and partial sensory rhizotomy for trigeminal neuralgia. *Neurosurgery*. 2005;56:1304-1311.
12. A Nanda, V Javalkar, S Zhang, O Ahmed. Long term efficacy and patient satisfaction of microvascular decompression and gamma knife radiosurgery for trigeminal neuralgia. *Journal of Clinical Neuroscience* 2015;22:818-822.
13. Linskey ME, Ratanatharathorn V, Peñagaricano J. A prospective cohort study of microvascular decompression and Gamma Knife surgery in patients with trigeminal. *J Neurosurg*. 2008;109 Suppl:160-172.
14. Zakrzewska JM, Thomas DG. Patient's assessment of outcome after three surgical procedures for the management of trigeminal neuralgia. *Acta Neurochir (Wien)*. 1993;122:225-230.
15. Sindrup SH, Jensen TS. Pharmacotherapy of trigeminal neuralgia. *Clin J Pain* 2002;18:22-27.
16. Wiffen PJ, McQuay HJ, Moore RA. Carbamazepine for acute and chronic pain. *Cochrane*

- 1  
2  
3 Database Syst Rev. 2005;(3):CD005451.
- 4 17. Zakrzewska JM, Patsalos PN. Long-term cohort study comparing medical (oxcarbazepine) and  
5 surgical management of intractable trigeminal neuralgia. *Pain*. 2002;95:259-66
- 6 18. Zakrzewska JM, Chaudhry Z, Nurmikko TJ, et al. Lamotrigine (Lamictal) in refractory  
7 trigeminal neuralgia: results from a double-blind placebo controlled crossover trial. *Pain*.  
8 1997;73:223-230.
- 9 19. Court JE, Kase CS. Treatment of tic douloureux with a new anticonvulsant (clonazepam). *J*  
10 *Neurol Neurosurg Psychiatry*. 1976;39:297-299.
- 11 20. Yuan M, Zhou HY, Xiao ZL, et al. Efficacy and Safety of Gabapentin vs. Carbamazepine in  
12 the Treatment of Trigeminal Neuralgia: A Meta-Analysis. *Pain Pract*. 2016;16:1083-1091
- 13 21. Obermann M, Yoon MS, Sensen K, Maschke M, Diener HC, Katsarava Z. Efficacy of  
14 pregabalin in the treatment of trigeminal neuralgia. *Cephalalgia*. 2008;28:174-181.
- 15 22. Peiris JB, Perera GL, Devendra SV, Lionel ND. Sodium valproate in trigeminal neuralgia.  
16 *Med J Aust*. 1980;2:278.
- 17 23. Zakrzewska JM, Linskey ME. Trigeminal neuralgia. *Clin Evid*. 2014;10:1207
- 18 24. McQuay H, Carroll D, Jadad AR, et al. Anticonvulsant drugs for management of pain: a  
19 systematic review. *BMJ*. 1995;311:1047-1052.
- 20 25. Wiffen PJ, Rees J. Lamotrigine for acute and chronic pain. *Cochrane Database Syst Rev*.  
21 2007;(2):CD006044.
- 22 26. Wiffen PJ, McQuay HJ, Rees J, Moore RA. Gabapentin for acute and chronic pain. *Cochrane*  
23 *Database Syst Rev*. 2005;(3):CD005452.
- 24 27. Wiffen PJ, Derry S, Moore RA, McQuay HJ. Carbamazepine for acute and chronic pain in  
25 adults. *Cochrane Database Syst Rev*. 2011;(1):CD005451.
- 26 28. Moore RA, Straube S, Wiffen PJ, Derry S, McQuay HJ. Pregabalin for acute and chronic pain  
27 in adults. *Cochrane Database Syst Rev*. 2009;(3):CD007076.
- 28 29. Caldwell DM, Ades AE, Higgins JP. Simultaneous comparison of multiple treatments:  
29 combining direct and indirect evidence. *BMJ*. 2005;331:897-900.
- 30 30. Cipriani A, Higgins JP, Geddes JR, Salanti G. Conceptual and technical challenges in network  
31 meta-analysis. *Ann Intern Med*. 2013;159:130-137.
- 32 31. Cipriani A, Furukawa TA, Salanti G, et al. Comparative efficacy and acceptability of 12  
33 new-generation antidepressants: a multiple-treatments meta-analysis. *Lancet*. 2009;373:746-758.
- 34 32. Shamseer L, Moher D, Clarke M, et al. Preferred reporting items for systematic review and  
35 meta-analysis protocols (PRISMA-P) 2015: elaboration and explanation. *BMJ*. 2015;349:g7647.
- 36 33. Hutton B, Salanti G, Caldwell DM, et al. The PRISMA Extension Statement for Reporting of  
37 Systematic Reviews Incorporating Network Meta-analyses of Health Care Interventions: Checklist  
38 and Explanations. *Ann Intern Med*. 2015;162:777-784.
- 39 34. Merskey H, Bogduk N. Classification of chronic pain. Descriptions of chronic pain syndromes  
40 and definitions of pain terms, IASP Press, Seattle 1994, pp. 59-71.
- 41  
42  
43  
44  
45  
46  
47  
48  
49  
50  
51  
52  
53  
54  
55  
56  
57  
58  
59  
60

- 1
- 2
- 3 35. Zakrzewska JM. Diagnosis and differential diagnosis of trigeminal neuralgia. *Clin J Pain.* 2002;18:14-21.
- 4
- 5
- 6 36. Dworkin RH, Turk DC, Farrar JT, et al. Core outcome measures for chronic pain clinical trials: IMMPACT recommendations. *Pain.* 2005;113:9-19.
- 7
- 8
- 9 37. Ware JE Jr, Sherbourne CD. The MOS 36-item short-form health survey (SF-36). I. Conceptual framework and item selection. *Med Care.* 1992;30:473-483.
- 10
- 11
- 12 38. Qin Z, Li B, Wu J, et al. Acupuncture for chronic diarrhea in adults: protocol for a systematic review. *Medicine (Baltimore).* 2017;94:e5952.
- 13
- 14
- 15 39. Higgins JPT, Altman DG, Sterne JAC (editors). Chapter 8: Assessing risk of bias in included studies. In: Higgins JPT, Green S(editors). *Cochrane Handbook for Systematic Reviews of Intervention Version 5.1.0 [updated March 2011].* The Cochrane Collaboration, 2011. Available from [www.cochrane-handbook.org](http://www.cochrane-handbook.org).
- 16
- 17
- 18
- 19
- 20 40. Salanti G, Del Giovane C, Chaimani A, et al. Evaluating the quality of evidence from a network meta-analysis. *PLoS ONE.* 2014;9:e99682.
- 21
- 22
- 23 41. Furukawa TA, Cipriani A, Barbui C, Brambilla P, Watanabe N. Imputing response rates from means and standard deviations in meta-analyses. *Int Clin Psychopharmacol.* 2005;20:49-52.
- 24
- 25
- 26 42. Lu G, Ades AE. Combination of direct and indirect evidence in mixed treatment comparisons. *Stat Med.* 2004;23:3105-3124
- 27
- 28
- 29 43. Zhang J, Carlin B.P, Neaton J.D, et al. Network meta-analysis of randomized clinical trials: Reporting the proper summaries. *Clinical Trials.* 2014;11:246-262
- 30
- 31
- 32 44. Chaimani A, Higgins JPT, Mavridis D, Spyridonos P, Salanti G. Graphical tools for network meta-analysis in STATA. *PLoS One.* 2013;8:e76654.
- 33
- 34
- 35 45. Higgins JP, Thompson SG, Deeks JJ, Altman DG. Measuring inconsistency in meta-analyses. *BMJ.* 2003;327:557-560.
- 36
- 37
- 38 46. Baker SG, Kramer BS. The transitive fallacy for randomized trials: if A bests B and B bests C in separate trials, is A better than C? *BMC Med Res Methodol.* 2002;2:13.
- 39
- 40
- 41 47. White IR, Barrett JK, Jackson D, et al. Consistency and inconsistency in network meta-analysis: model estimation using multivariate meta-regression. *Res Synth Methods.* 2012;3:111-125
- 42
- 43
- 44
- 45 48. Higgins JPT, Jackson D, Barrett JL, et al. Consistency and inconsistency in network meta-analysis: concepts and models for multi-arm studies. *Res Synth Methods.* 2012;3:98-110
- 46
- 47
- 48 49. Dias S, Welton NJ, Caldwell DM, et al. Checking consistency in mixed treatment comparison meta-analysis. *Stat Med.* 2010;29:932-944
- 49
- 50
- 51 50. Lu G, Ades AE. Assessing evidence inconsistency in mixed treatment comparisons. *J Am Stat Assoc.* 2006;101:447-459.
- 52
- 53
- 54 51. Veroniki AA, Vasiliadis HS, Higgins JP, Salanti G. Evaluation of inconsistency in networks of interventions. *Int J Epidemiol.* 2013;42:332-345.
- 55
- 56
- 57
- 58
- 59
- 60

1  
2  
3 **Figure legends of figure:**  
4

5 Figure 1. Network plot of all possible direct comparisons between the eligible interventions.  
6

7 Figure 2. PRISMA flow chart.  
8  
9  
10  
11  
12  
13  
14  
15  
16  
17  
18  
19  
20  
21  
22  
23  
24  
25  
26  
27  
28  
29  
30  
31  
32  
33  
34  
35  
36  
37  
38  
39  
40  
41  
42  
43  
44  
45  
46  
47  
48  
49  
50  
51  
52  
53  
54  
55  
56  
57  
58  
59  
60

For peer review only

1  
2  
3  
4  
5  
6  
7  
8  
9  
10  
11  
12  
13  
14  
15  
16  
17  
18  
19  
20  
21  
22  
23  
24  
25  
26  
27  
28  
29  
30  
31  
32  
33  
34  
35  
36  
37  
38  
39  
40  
41  
42  
43  
44  
45  
46  
47  
48  
49  
50  
51  
52  
53  
54  
55  
56  
57  
58  
59  
60



Network plot of all possible direct comparisons between the eligible interventions.

140x101mm (300 x 300 DPI)

Review only



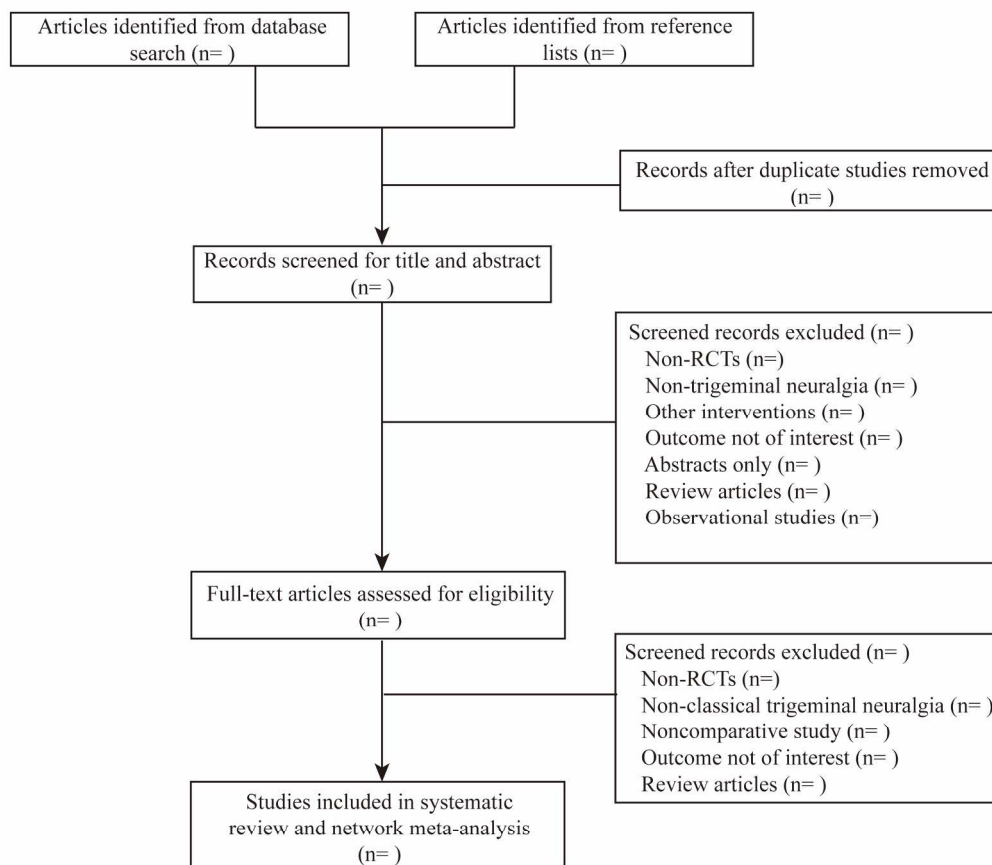

PRISMA flow chart

192x219mm (300 x 300 DPI)

**PRISMA-P (Preferred Reporting Items for Systematic review and Meta-Analysis Protocols) 2015 checklist: recommended items to address in a systematic review protocol\***

| Section and topic                 | Item No | Checklist item                                                                                                                                                                                                                                       |
|-----------------------------------|---------|------------------------------------------------------------------------------------------------------------------------------------------------------------------------------------------------------------------------------------------------------|
| <b>ADMINISTRATIVE INFORMATION</b> |         |                                                                                                                                                                                                                                                      |
| Title:                            |         |                                                                                                                                                                                                                                                      |
| Identification                    | 1a      | Identify the report as a protocol of a systematic review <a href="#">Page 1</a>                                                                                                                                                                      |
| Update                            | 1b      | If the protocol is for an update of a previous systematic review, identify as such <a href="#">NA</a>                                                                                                                                                |
| Registration                      | 2       | If registered, provide the name of the registry (such as PROSPERO) and registration number <a href="#">Page 2</a>                                                                                                                                    |
| Authors:                          |         |                                                                                                                                                                                                                                                      |
| Contact                           | 3a      | Provide name, institutional affiliation, e-mail address of all protocol authors; provide physical mailing address of corresponding author <a href="#">Page 1</a>                                                                                     |
| Contributions                     | 3b      | Describe contributions of protocol authors and identify the guarantor of the review <a href="#">Page 11</a>                                                                                                                                          |
| Amendments                        | 4       | If the protocol represents an amendment of a previously completed or published protocol, identify as such and list changes; otherwise, state plan for documenting important protocol amendments <a href="#">Page 11</a>                              |
| Support:                          |         |                                                                                                                                                                                                                                                      |
| Sources                           | 5a      | Indicate sources of financial or other support for the review <a href="#">Page 11</a>                                                                                                                                                                |
| Sponsor                           | 5b      | Provide name for the review funder and/or sponsor <a href="#">Page 11</a>                                                                                                                                                                            |
| Role of sponsor or funder         | 5c      | Describe roles of funder(s), sponsor(s), and/or institution(s), if any, in developing the protocol <a href="#">Page 11</a>                                                                                                                           |
| <b>INTRODUCTION</b>               |         |                                                                                                                                                                                                                                                      |
| Rationale                         | 6       | Describe the rationale for the review in the context of what is already known <a href="#">Page 3</a>                                                                                                                                                 |
| Objectives                        | 7       | Provide an explicit statement of the question(s) the review will address with reference to participants, interventions, comparators, and outcomes (PICO) <a href="#">Page 4</a>                                                                      |
| <b>METHODS</b>                    |         |                                                                                                                                                                                                                                                      |
| Eligibility criteria              | 8       | Specify the study characteristics (such as PICO, study design, setting, time frame) and report characteristics (such as years considered, language, publication status) to be used as criteria for eligibility for the review <a href="#">Page 4</a> |
| Information sources               | 9       | Describe all intended information sources (such as electronic databases, contact with study authors, trial registers or other grey literature sources) with planned dates of coverage <a href="#">Page 5</a>                                         |
| Search strategy                   | 10      | Present draft of search strategy to be used for at least one electronic database, including planned limits, such that it could be repeated <a href="#">Page 6</a>                                                                                    |
| Study records:                    |         |                                                                                                                                                                                                                                                      |
| Data management                   | 11a     | Describe the mechanism(s) that will be used to manage records and data throughout the review <a href="#">Page 6-7</a>                                                                                                                                |

|    |                                    |     |                                                                                                                                                                                                                                                                         |
|----|------------------------------------|-----|-------------------------------------------------------------------------------------------------------------------------------------------------------------------------------------------------------------------------------------------------------------------------|
| 1  |                                    |     |                                                                                                                                                                                                                                                                         |
| 2  |                                    |     |                                                                                                                                                                                                                                                                         |
| 3  |                                    |     |                                                                                                                                                                                                                                                                         |
| 4  | Selection process                  | 11b | State the process that will be used for selecting studies (such as two independent reviewers) through each phase of the review (that is, screening, eligibility and inclusion in meta-analysis) <a href="#">Page 6-7</a>                                                |
| 5  | Data collection process            | 11c | Describe planned method of extracting data from reports (such as piloting forms, done independently, in duplicate), any processes for obtaining and confirming data from investigators <a href="#">Page 6-7</a>                                                         |
| 6  |                                    |     |                                                                                                                                                                                                                                                                         |
| 7  | Data items                         | 12  | List and define all variables for which data will be sought (such as PICO items, funding sources), any pre-planned data assumptions and simplifications <a href="#">Page 6-7</a>                                                                                        |
| 8  |                                    |     |                                                                                                                                                                                                                                                                         |
| 9  |                                    |     |                                                                                                                                                                                                                                                                         |
| 10 | Outcomes and prioritization        | 13  | List and define all outcomes for which data will be sought, including prioritization of main and additional outcomes, with rationale <a href="#">Page 5-6</a>                                                                                                           |
| 11 |                                    |     |                                                                                                                                                                                                                                                                         |
| 12 | Risk of bias in individual studies | 14  | Describe anticipated methods for assessing risk of bias of individual studies, including whether this will be done at the outcome or study level, or both; state how this information will be used in data synthesis <a href="#">Page 7</a>                             |
| 13 |                                    |     |                                                                                                                                                                                                                                                                         |
| 14 | Data synthesis                     | 15a | Describe criteria under which study data will be quantitatively synthesised <a href="#">Page 7-8</a>                                                                                                                                                                    |
| 15 |                                    | 15b | If data are appropriate for quantitative synthesis, describe planned summary measures, methods of handling data and methods of combining data from studies, including any planned exploration of consistency (such as $I^2$ , Kendall's $\tau$ ) <a href="#">Page 8</a> |
| 16 |                                    | 15c | Describe any proposed additional analyses (such as sensitivity or subgroup analyses, meta-regression) <a href="#">Page 9-10</a>                                                                                                                                         |
| 17 |                                    | 15d | If quantitative synthesis is not appropriate, describe the type of summary planned <a href="#">Page 9-10</a>                                                                                                                                                            |
| 18 |                                    |     |                                                                                                                                                                                                                                                                         |
| 19 | Meta-bias(es)                      | 16  | Specify any planned assessment of meta-bias(es) (such as publication bias across studies, selective reporting within studies) <a href="#">Page 7</a>                                                                                                                    |
| 20 |                                    |     |                                                                                                                                                                                                                                                                         |
| 21 | Confidence in cumulative evidence  | 17  | Describe how the strength of the body of evidence will be assessed (such as GRADE) <a href="#">Page 7</a>                                                                                                                                                               |
| 22 |                                    |     |                                                                                                                                                                                                                                                                         |

**\* It is strongly recommended that this checklist be read in conjunction with the PRISMA-P Explanation and Elaboration (cite when available) for important clarification on the items. Amendments to a review protocol should be tracked and dated. The copyright for PRISMA-P (including checklist) is held by the PRISMA-P Group and is distributed under a Creative Commons Attribution Licence 4.0.**

*From: Shamseer L, Moher D, Clarke M, Ghersi D, Liberati A, Petticrew M, Shekelle P, Stewart L, PRISMA-P Group. Preferred reporting items for systematic review and meta-analysis protocols (PRISMA-P) 2015: elaboration and explanation. *BMJ*. 2015 Jan 2;349(jan02 1):g7647.*

**PubMed****Patient**

#1 "Trigeminal Neuralgia"[Mesh]

#2 Trigeminal Neuralgia\*[Title/Abstract] OR Trifacial Neuralgia\*[Title/Abstract] OR Fothergill Disease[Title/Abstract] OR Tic Douloureux[Title/Abstract] OR Epileptiform Neuralgia\*[Title/Abstract] OR trigeminus neuralgia[Title/Abstract] OR prosopalgia[Title/Abstract] OR prosoponeuralgia[Title/Abstract] OR trigeminal nerve neuralgia[Title/Abstract] OR trigeminal nerve neuropathy[Title/Abstract] OR trigeminal neuropathy[Title/Abstract] OR trigeminus nerve neuralgia[Title/Abstract] OR trigeminus nerve neuropathy[Title/Abstract]

#3 #1 OR #2

**RCT**

#4 "Clinical Trials, Phase II as Topic"[Mesh] OR "Clinical Trials, Phase III as Topic"[Mesh] OR "Clinical Trials, Phase IV as Topic"[Mesh] OR "Controlled Clinical Trials as Topic"[Mesh] OR "Randomized Controlled Trials as Topic"[Mesh] OR "Intention to Treat Analysis"[Mesh] OR "Pragmatic Clinical Trials as Topic"[Mesh] OR "Clinical Trials, Phase II"[Publication Type] OR "Clinical Trials, Phase III"[Publication Type] OR "Clinical Trials, Phase IV"[Publication Type] OR "Controlled Clinical Trials"[Publication Type] OR "Randomized Controlled Trials"[Publication Type] OR "Pragmatic Clinical Trials as Topic"[Publication Type] OR "Single-Blind Method"[Mesh] OR "Double-Blind Method"[Mesh]

#5 random\*[Title/Abstract] OR blind\*[Title/Abstract] OR singleblind\*[Title/Abstract] OR doubleblind\*[Title/Abstract] OR trebleblind\*[Title/Abstract] OR tripleblind\*[Title/Abstract]

#6 #4 OR #5

#7 #3 AND #6

**EMBASE.com****Patient**

#1 'trigeminus neuralgia'/exp

#2 'trigeminal neuralgias':ab,ti OR 'trifacial neuralgias':ab,ti OR 'trigeminal neuralgia':ab,ti OR 'trifacial neuralgia':ab,ti OR 'fothergill disease':ab,ti OR 'tic douloureux':ab,ti OR 'epileptiform neuralgia':ab,ti OR 'epileptiform neuralgias':ab,ti OR 'trigeminus neuralgia':ab,ti OR prosopalgia:ab,ti OR prosoponeuralgia:ab,ti OR 'trigeminal nerve neuralgia':ab,ti OR 'trigeminal nerve neuropathy':ab,ti OR 'rigeminal neuropathy':ab,ti OR 'trigeminus nerve neuralgia':ab,ti OR 'trigeminus nerve neuropathy':ab,ti

#3 #1 OR #2

**RCT**

#4 'multicenter study (topic)'/exp OR 'phase 2 clinical trial (topic)'/exp OR 'phase 3 clinical trial

1  
2  
3  
4 (topic)/exp OR 'phase 4 clinical trial (topic)/exp OR 'controlled clinical trial (topic)/exp OR  
5 'randomized controlled trial (topic)/exp OR 'single blind procedure'/exp OR 'double blind  
6 procedure'/exp  
7

8  
9 #5 random\*:ab,ti OR blind\*:ab,ti OR singleblind\*:ab,ti OR doubleblind\*:ab,ti OR trebleblind\*:ab,ti  
10 OR tripleblind\*:ab,ti

11 #6 #4 OR #5

12 #7 #3 AND #6  
13  
14  
15

## 16 17 **Cochrane Library**

18  
19 #1 MeSH descriptor: [Trigeminal Neuralgia] explode all trees

20  
21 #2 Trigeminal Neuralgia\*:ti,ab,kw or Trifacial Neuralgia\*:ti,ab,kw or Fothergill Disease:ti,ab,kw  
22 or Tic Douloureux:ti,ab,kw or Epileptiform Neuralgia\*:ti,ab,kw or trigeminus neuralgia:ti,ab,kw or  
23 prosopalgia:ti,ab,kw or prosoponeuralgia:ti,ab,kw or trigeminal nerve neuralgia:ti,ab,kw or  
24 trigeminal nerve neuropathy:ti,ab,kw or trigeminal neuropathy:ti,ab,kw or trigeminus nerve  
25 neuralgia:ti,ab,kw or trigeminus nerve neuropathy:ti,ab,kw  
26  
27  
28

29 #3 #1 or #2  
30  
31  
32  
33  
34  
35  
36  
37  
38  
39  
40  
41  
42  
43  
44  
45  
46  
47  
48  
49  
50  
51  
52  
53  
54  
55  
56  
57  
58  
59  
60

# BMJ Open

## Comparative Efficacy and Acceptability of Antiepileptic Drugs for Classical Trigeminal Neuralgia: A Bayesian Network Meta-Analysis Protocol

|                                 |                                                                                                                                                                                                                                                                                                                                                                                                                                                                                                                                                                                                                                                                                                                                                                                                                                                                                                                                                                                                                                   |
|---------------------------------|-----------------------------------------------------------------------------------------------------------------------------------------------------------------------------------------------------------------------------------------------------------------------------------------------------------------------------------------------------------------------------------------------------------------------------------------------------------------------------------------------------------------------------------------------------------------------------------------------------------------------------------------------------------------------------------------------------------------------------------------------------------------------------------------------------------------------------------------------------------------------------------------------------------------------------------------------------------------------------------------------------------------------------------|
| Journal:                        | <i>BMJ Open</i>                                                                                                                                                                                                                                                                                                                                                                                                                                                                                                                                                                                                                                                                                                                                                                                                                                                                                                                                                                                                                   |
| Manuscript ID                   | bmjopen-2017-017392.R3                                                                                                                                                                                                                                                                                                                                                                                                                                                                                                                                                                                                                                                                                                                                                                                                                                                                                                                                                                                                            |
| Article Type:                   | Protocol                                                                                                                                                                                                                                                                                                                                                                                                                                                                                                                                                                                                                                                                                                                                                                                                                                                                                                                                                                                                                          |
| Date Submitted by the Author:   | 24-Oct-2017                                                                                                                                                                                                                                                                                                                                                                                                                                                                                                                                                                                                                                                                                                                                                                                                                                                                                                                                                                                                                       |
| Complete List of Authors:       | Qin, Zongshi; Guang'anmen Hospital, China Academy of Chinese Medical Sciences, Department of Acupuncture and Neurology<br>Xie, Shang; Peking University School and Hospital of Stomatology, Department of Oral and Maxillofacial Surgery<br>Mao, Zhi; Chinese People's Liberation Army General Hospital, Department of Critical Care Medicine<br>Liu, Yan; China Academy of Chinese Medical Sciences, Data Centre of Traditional Chinese Medicine<br>WU, Jiani; Guang'anmen Hospital, China Academy of Chinese Medical Sciences, Department of Acupuncture and Neurology<br>Furukawa, Toshi; Kyoto University, Graduate School of Medicine and School of Public Health<br>Kwong, Joey; Taipei Medical University, Cochrane Taiwan; National Center for Child Health and Development, Department of Health Policy & Department of Clinical Epidemiology<br>Tian, Jinhui; Evidence based medicine center,<br>Liu, Zhishun; Guang'anmen Hospital, China Academy of Chinese Medical Sciences, Department of Acupuncture and Neurology |
| <b>Primary Subject Heading</b>: | Evidence based practice                                                                                                                                                                                                                                                                                                                                                                                                                                                                                                                                                                                                                                                                                                                                                                                                                                                                                                                                                                                                           |
| Secondary Subject Heading:      | Neurology                                                                                                                                                                                                                                                                                                                                                                                                                                                                                                                                                                                                                                                                                                                                                                                                                                                                                                                                                                                                                         |
| Keywords:                       | antiepileptic drugs, trigeminal neuralgia, network meta-analysis, systematic review, protocol                                                                                                                                                                                                                                                                                                                                                                                                                                                                                                                                                                                                                                                                                                                                                                                                                                                                                                                                     |
|                                 |                                                                                                                                                                                                                                                                                                                                                                                                                                                                                                                                                                                                                                                                                                                                                                                                                                                                                                                                                                                                                                   |

SCHOLARONE™  
Manuscripts

1  
2  
3 **Comparative Efficacy and Acceptability of Antiepileptic Drugs for Classical**  
4 **Trigeminal Neuralgia: A Bayesian Network Meta-Analysis Protocol**  
5  
6  
7

8  
9 Zongshi Qin,<sup>1</sup> Shang Xie<sup>2</sup>, Zhi Mao<sup>3</sup>, Yan Liu<sup>4</sup>, Jiani Wu<sup>1</sup>, Toshi A Furukawa<sup>5</sup>, Joey S.W.  
10 Kwong<sup>6,7</sup>, Jinhui Tian<sup>8</sup>, Zhishun Liu<sup>1</sup>

11  
12 <sup>1</sup> Department of Acupuncture and Neurology, Guang'anmen Hospital, China Academy of Chinese  
13 Medical Sciences, Beijing, China  
14

15  
16 <sup>2</sup> Department of Oral and Maxillofacial Surgery, Peking University School and Hospital of  
17 Stomatology, Beijing, China  
18

19  
20 <sup>3</sup> Department of Critical Care Medicine, Chinese People's Liberation Army General Hospital,  
21 Beijing, China  
22

23  
24 <sup>4</sup> Data Centre of Traditional Chinese Medicine, China Academy of Chinese Medical Sciences,  
25 Beijing, China  
26

27  
28 <sup>5</sup> Department of Health Promotion and Human Behavior, Kyoto University Graduate School of  
29 Medicine/School of Public Health, Kyoto, Japan  
30

31  
32 <sup>6</sup> Cochrane Taiwan, Taipei Medical University, Taipei, Taiwan  
33

34  
35 <sup>7</sup> Department of Health Policy & Department of Clinical Epidemiology, National Center for Child  
36 Health and Development, Tokyo, Japan  
37

38  
39 <sup>8</sup> Evidence-based Medicine Center, Lanzhou University, Lanzhou, China  
40

41 ZQ, SX and ZM contributed equally to this work.

42 Correspondence to: Zhishun Liu, email: liuzhishun@aliyun.com

43  
44 Keywords: antiepileptic drugs; trigeminal neuralgia; network meta-analysis; systematic review;  
45 protocol  
46  
47  
48  
49  
50  
51  
52  
53  
54  
55  
56  
57  
58  
59  
60

## ABSTRACT

**Introduction** Trigeminal neuralgia (TN) affects 4 to 28.9/100,000 people worldwide, and antiepileptic drugs such as carbamazepine and oxcarbazepine are the first-line treatment options. However, the efficacy and safety of other antiepileptic drugs remain unclear due to insufficient direct comparisons.

**Objective** To compare the efficacy and acceptability of all currently available antiepileptic agents for the treatment of patients with classical TN.

**Methods** We will search the PubMed, EMBASE, Cochrane Library, and Web of Science databases for unpublished or undergoing research listed in registry platforms. We will include all randomized controlled trials comparing two different antiepileptic drugs or one antiepileptic drug with placebo in patients with classic TN. The primary outcomes will be the proportion of responders and the number of subjects who drop out during the treatment. The secondary outcomes include the two primary outcomes but set in the follow-up period, changes in the self-reporting assessment scale for neuralgia, and quality of life assessment. In terms of network meta-analysis, we will fit our model in a Bayesian framework using JAGS and pnetmeta package of R project.

**Ethics and dissemination** This protocol will not disseminate any private patient data. The results of this review will be disseminated through peer-reviewed publication.

**Protocol registration for this systematic review (registration number):** PROSPERO (CRD: 42016048640).

### Strengths and limitations of this study

- To the best of the authors' knowledge, this study will be the first network meta-analysis that assess the comparative efficacy and acceptability of all the available antiepileptic drugs for the classical trigeminal neuralgia.
- This study will be performed by Bayesian framework, which enables us to estimate the probability for each intervention to be the best for each outcome.
- Owing to the language barrier, the amount of included trials might be potentially limited.



## Introduction

Classical trigeminal neuralgia (TN), a chronic pain disorder described as one of the most severe pains one can suffer, is characterized by paroxysms of unilateral, electric shock-like, and severe pain along the trigeminal nerve divisions.<sup>1,2</sup> It affects lifestyle because it can be triggered by common activities such as eating, talking, shaving and brushing teeth. The wind, chewing and talking also aggravate the condition in many patients.<sup>2</sup> It is estimated that approximately 4 to 28.9 per 100,000 people worldwide suffer from TN, and the number affected tends to be higher among women at all ages and even increases with age.<sup>3,4</sup>

At present, the cause of TN remains unclear.<sup>5,6</sup> One hypothesis is that the trigeminal nerve becomes compressed at the root entry zone by cerebral vessels.<sup>7</sup> Owing to the contradictory etiology and poorly understood pathophysiological mechanisms underlying TN, a variety of therapeutic and surgical approaches have been developed to alleviate the associated pain and improve the quality of life in patients with classical TN.<sup>8-10</sup> Although many patients have obtained excellent outcomes from surgery, many others do not experience any pain relief.<sup>11,12</sup> Furthermore, the currently available surgical procedures are associated with various complications, particularly sensory loss in the trigeminal nerve territory, anesthesia dolorosa and, rarely, ipsilateral hearing loss, depending on the technique.<sup>13,14</sup>

As such, pharmacological measures to improve clinical outcomes are needed. The most commonly used option is antiepileptic drugs, with phenytoin being the first drug used for classical TN with positive effect.<sup>15</sup> Carbamazepine can reduce both the frequency and intensity of painful paroxysms and was first introduced by the US Food and Drug Administration (FDA); however, its efficacy is compromised by poor tolerability.<sup>16</sup> Oxcarbazepine, a derivative of carbamazepine, is often used as an initial treatment for classical TN and has more favorable properties than carbamazepine related to its increased efficacy in epilepsy, greater tolerability and decreased potential for drug interactions.<sup>17</sup> Lamotrigine has also been reported as an effective add-on therapy,<sup>18</sup> whereas little evidence supports that other antiepileptic drugs such as clonazepam, gabapentin, pregabalin and valproate have a beneficial effect.<sup>19-22</sup> However, many of the studies are old with limited methodology, and were assessed as low GRADE scores.<sup>23</sup>

To date, several systematic reviews have investigated the comparative efficacy and safety of antiepileptic drugs.<sup>20,24-28</sup> However, previous systematic reviews have only considered pair-wise

1  
2  
3 evidence from head-to-head comparisons and have thus failed to assess the comparative efficacy  
4 and acceptability of all available antiepileptic drugs. Thus, it is difficult to determine the best  
5 treatments for relieving pain with minimal adverse effects. In the present study, we choose a group  
6 of 9 antiepileptic drugs looking at the drugs which were licensed for neuralgia in many countries  
7 and which were frequently used in clinical practice. We will apply network meta-analysis to  
8 integrate direct and indirect comparisons,<sup>29,30</sup> which could be used not only to strengthen  
9 inferences concerning the efficacy and acceptability of treatments but also to rank the efficacy and  
10 acceptability of antiepileptic drugs accordingly.<sup>31</sup>

11  
12 The objectives of this systematic review and network meta-analysis are 1) to compare all currently  
13 available antiepileptic drugs in terms of efficacy and acceptability in classical TN treatment and 2)  
14 to determine which drug achieves the best balance between efficacy and adverse effects. The  
15 results of this study will augment findings based on current pair-wise meta-analyses and are  
16 expected to provide important information to support clinical practice and health policy decisions.  
17  
18

## 19 20 21 22 23 24 25 26 27 28 29 30 **METHODS**

31 This protocol will be conducted in accordance with the reporting guidance provided in the  
32 Preferred Reporting Items for Systematic Reviews and Meta-Analysis Protocols (PRISMA-P)  
33 statement and Checklist of Items to Include When Reporting a Systematic Review Involving a  
34 Network Meta-analysis.<sup>32,33</sup> The protocol is registered in PROSPERO (CRD: 42016048640). This  
35 study will not involve any private patient data, ethical approval was waived. (supplemental file 1  
36 represents the PRISMA-P checklist)  
37  
38  
39  
40  
41  
42  
43  
44

### 45 **Eligibility criteria**

#### 46 **Study types**

47 We will include randomized controlled trials (RCTs) comparing one antiepileptic drug with  
48 another antiepileptic drug as monotherapy or placebo for the treatment of TN. Quasi-randomized  
49 controlled trails allocating participants according to birth date or the consequences of enrollment  
50 will be excluded. The minimum duration for RCT inclusion was set at 4 weeks. Trials with more  
51 than a two-arm design will be considered only if the available data meet the criteria for an  
52 intervention. For trials with a crossover design, data will only be extracted from the first  
53  
54  
55  
56  
57  
58  
59  
60

1  
2  
3 randomization period.  
4  
5  
6

#### 7 Participant characteristics

8  
9 Only trials that enrolled participants with a diagnosis of classical TN according to standardized  
10 criteria such as the classification of the International Headache Society (IHS) of International  
11 Classification of Headache Disorders will be sought.<sup>1,34</sup> For studies using other extensive criteria  
12 for the diagnosis of classical TN, detailed diagnostic criteria must be reported (such as history or  
13 characteristics that have been confirmed by CT or MRI).<sup>35</sup> Studies examining symptomatic TN  
14 patients will not be included. Participants with comorbid conditions such as anxiety, depression,  
15 epilepsy or other medical conditions will also not be eligible for inclusion. No limitations will be  
16 imposed for age, sex, or nationality.  
17  
18  
19  
20  
21  
22  
23

#### 24 Intervention types

25  
26 We plan to include the following antiepileptic drugs: carbamazepine, lamotrigine, clonazepam,  
27 phenytoin, valproate, gabapentin, pregabalin, oxcarbazepine and topiramate. In addition to these  
28 antiepileptic drugs, we will also obtain information about interventions of interest from either  
29 pair-wise RCTs or placebo-controlled trials, as some RCTs design a placebo-controlled arm as the  
30 comparator. Figure 1 illustrates the network plot of all possible direct comparisons between the  
31 eligible interventions.  
32  
33  
34  
35  
36  
37  
38  
39  
40

#### 41 Outcome measures

42 Studies reporting one of the following will be included.

#### 43 Primary outcome

44  
45 The primary objective of this review is to assess the efficacy and acceptability of antiepileptic  
46 drugs for classical TN; therefore, the following two outcomes will be used as the primary  
47 outcome.  
48  
49  
50

51  
52 1. The proportion of responders to a self-reporting assessment scale for neuralgia. A responder was  
53 defined as a subject who obtained a  $\geq 50\%$  pain reduction score from baseline to endpoint (4–12  
54 weeks) or a subject who obtained a pain reducing score of no less than the minimal clinically  
55 important difference (MCID). Pain scores will be extracted based on the visual analogue score  
56  
57  
58  
59  
60

1  
2  
3 (VAS), numerical rating score (NRS), or any other validated scale for the assessment of overall  
4 TN symptoms when available.<sup>36</sup>

5  
6  
7 2. Treatment acceptability is defined as the proportion of patients who have intervention related  
8 adverse events during the 4 to 12 weeks.

#### 9 10 11 Secondary outcomes

12  
13 1. The proportion of responders with  $\geq 50\%$  pain reduction on a self-reporting assessment scale for  
14 neuralgia from baseline to endpoint after follow-up.

15  
16 2. The change in pain symptoms of TN from baseline to endpoint (4–12 weeks) measured based  
17 on the VAS, NRS, or any other validated scale for the assessment of overall TN symptoms when  
18 available.

19  
20 3. The change in pain symptoms of TN from baseline to endpoint after follow-up.

21  
22 4. The quality of life based on measurement with a validated scale, such as the Short Form 36  
23 Health Survey questionnaire (SF-36).<sup>37</sup>

#### 24 25 26 27 28 29 30 **Search strategy**

31 We will identify RCTs through a comprehensive, systematic literature search primarily utilizing  
32 the PubMed, EMBASE, Cochrane Library, and Web of Science databases. As publication bias  
33 caused by insufficient unpublished data can significantly bias the comparative efficacy results of  
34 network meta-analysis and modify rankings, we will also perform searches for unpublished or  
35 ongoing trials using System for information on Grey Literature in Europe (SIGLE) as well as  
36 other registry platforms, such as Clinicaltrials.gov and the International Clinical Trials Registry  
37 Platform. Prior to completing this review, we will perform an additional search of each database  
38 and registration platform to guarantee that the most recent studies are included. We will use  
39 medical subject headings and text words related to ‘trigeminal neuralgia’ and ‘randomized  
40 controlled trial’ for the literature search. In addition, the reference lists of previous systematic  
41 reviews will be examined to ensure the quantity and accuracy of the included studies. The search  
42 strategy will be developed by JT and ZL, we anticipate that the aforementioned databases will be  
43 searched from their inception to 30<sup>th</sup> September, 2017. (supplemental file 2 represents the search  
44 strategies for PubMed, EMBASE and Cochrane Library)

### **Data collection process**

Two authors (SX and ZM) will scan the titles and abstracts of the trials after duplicated records have been excluded using EndNote X7 (Thomson Reuters, New York, NY). The scanning will be performed using EndNote, and all trials will be allocated to the following five groups: inclusion group, non-patient group, intervention group, outcome group, and awaiting group. A prior data collection process will be conducted using an electro-table created with Excel software, which has been used in our previous study.<sup>38</sup> The table will consist of four sheets, including general information (author list, publication year, and journal), characteristics of included trials (diagnostic criteria, age range, study drugs, and dose range), the risk of bias assessed using the Cochrane risk of bias tool, and outcome data extraction (number of participants who responded to treatment and the number who dropped out during the treatment). All original data will be submitted as an attachment. A flow chart illustrating this design is presented in Figure 2.

### **Quality assessment**

Two authors (JW and YL) will use the Cochrane risk of bias tool to assess the risk of bias of eligible studies, covering randomization, concealment allocation, blinding and other biases.<sup>39</sup> As inadequate concealment could potentially fail the randomization test, two independent review authors will pay particular attention to the adequacy of random allocation concealment and blinding. The other sources of bias will be assessed while considering sample size calculation method, diagnostic criteria, reporting of withdrawals and follow-up. Two authors (JK and JT) will assess the quality of evidence using Grading of Recommendations Assessment, Development and Evaluation (GRADE) framework, covering study limitations, inconsistency, indirectness, imprecision and publication bias.<sup>40</sup> The methods for rating the quality of direct comparisons are the same to the methods used in traditional meta-analysis, and following steps will be used in the whole assessment procedure: 1) presenting direct and indirect effect estimates; 2) rating the quality of direct and indirect estimates; 3) presenting the results of network meta-analysis; 4) rating the quality of network meta-analysis effect estimates.

### **Dealing with missing data**

To obtain missing data, we will initially contact the senior or corresponding author. If no one

1  
2  
3  
4  
5  
6  
7  
8  
9  
10  
11  
12  
13  
14  
15  
16  
17  
18  
19  
20  
21  
22  
23  
24  
25  
26  
27  
28  
29  
30  
31  
32  
33  
34  
35  
36  
37  
38  
39  
40  
41  
42  
43  
44  
45  
46  
47  
48  
49  
50  
51  
52  
53  
54  
55  
56  
57  
58  
59  
60

responds, we will estimate the missing data as follows. For studies failing to report the number of responding patients after treatment, instead of providing the mean and standard deviation, we will calculate the number of responding patients employing a validated imputation method.<sup>41</sup> In addition, we will also estimate missing data from graphs when possible. For trials that cannot be extracted or estimated, the available data will be excluded, and the reason for exclusion will be reported.

### Statistical analysis

The method used for data synthesis will be based on mixed treatment meta-analysis. To examine comparisons, we will use Stata (13.0; Stata Corporation, College Station, Texas, USA) to synthesize data and will present the comparison results if the included studies are sufficient for each pair-wise comparison. We will use a random effects model to combine the data, and the outcomes of continuous and binary variables will be presented as standardized mean differences (SMDs) and odds ratios (ORs) with 95% confidential intervals (CIs). For indirect comparisons, we will perform arm-based network meta-analysis for all treatments using a random effects model with a Bayesian framework using the `pcnetmeta` package of R project, which could conduct calculation by calling JAGS software.<sup>42-44</sup> This will enable us to estimate the best probability for each intervention for each positive outcome, given the results of the multiple-treatment meta-analysis. At least one network focusing on the response rate for pain relief will be constructed, in which a statistically significant difference defined as the null value will not be included in the 95% CI. All model will be utilized for 50,000 simultaneous iterations based on the data and the description of the proposed distributions for relevant parameters, and the first 10,000 iterations will be discarded to avoid potential impact on the arbitrary value. For continuous outcomes and binary outcomes, the OR and SMD will be presented with the 95% credible interval (CrI). To describe relationships among different treatments, a network plot will be created to show direct comparisons between arms based on different outcomes.<sup>42</sup> In addition, the effectiveness of each treatment among all available treatments will be ranked by calculating the OR in order, and plots of the treatment rank probabilities will be generated to rank the various treatments for each outcome using the functions in package `pcnetmeta`.<sup>42,43</sup> We will also present a cluster rank table to synthesize the efficacy and acceptability of each drug (using two primary outcomes). The table

1  
2  
3 will consist of two triangles: the upper right triangle will illustrate the acceptability, and the lower  
4 left triangle will illustrate the efficacy.<sup>31</sup> For pair-wise meta-analyses we will use Stata 13.0. For  
5 network meta-analyses we will use JAGS and R project.  
6  
7  
8

### 9 10 **Assessment of heterogeneity**

11 Heterogeneity, which plays a pivotal role in both standard meta-analysis and network  
12 meta-analysis, refers to the degree of disagreement between study-specific treatment effects and  
13 constitutes the basis of inconsistency. To test the heterogeneity of each pair-wise comparison, we  
14 will use the  $I^2$  statistic.<sup>45</sup>  
15  
16  
17

### 18 19 20 **Assessment of transitivity and similarity**

21 In addition to the heterogeneity assessment using the  $I^2$  statistic, the assumption of transitivity and  
22 similarity based on clinical and methodological characteristics will be assessed. It should be noted  
23 that it is difficult to identify these effect modifiers using statistical analysis. We will assume that  
24 intervention effects are transitive in this network meta-analysis because we will only focus on  
25 antiepileptic drugs, and we will investigate similarity based on clinical characteristics, such as  
26 antiepileptic drug dose, period of treatment, and severity of pain symptoms at baseline, as well as  
27 according to methodological characteristics such as study quality.<sup>46</sup> All these effect modifiers will  
28 be judged and reported before the network meta-analysis is conducted.  
29  
30  
31  
32  
33  
34  
35  
36  
37  
38

### 39 40 **Assessment of inconsistency**

41 The evaluation and explanation of inconsistency is another basic objective of network  
42 meta-analysis. In this context, inconsistency refers to the degree of difference between direct and  
43 indirect comparisons and can be evaluated only when a loop exists in the evidence network. This  
44 means that inconsistency assessment using a design-by-treatment interaction model cannot be  
45 conducted if the structure of this network is a “star network” (i.e., all interventions have a single  
46 mutual comparator, such as a placebo).<sup>47,48</sup> For such cases, we will test inconsistency using a  
47 node-splitting model.<sup>49</sup>  
48  
49

50 To identify inconsistency among the included trials of the network, we will use Stata, performing  
51 the Z test to compare direct and indirect summary effects in specific loops.<sup>50</sup> If there is no  
52 inconsistency between loops or designs, we will use a consistency model to calculate the data. For  
53  
54  
55  
56  
57  
58  
59  
60

1  
2  
3 cases of significant incoherence, we will initially look for data extraction errors in loops that  
4 present inconsistency and in comparisons with large heterogeneity.<sup>51</sup> After the data have been  
5 scrutinized, we will investigate possible sources of inconsistency within clinical and  
6 methodological variables suspected of being potential sources of either heterogeneity or  
7 incoherence in each comparison-specific group of trials. If an important inconsistency cannot be  
8 explained, we will consider avoiding synthesis of the related network.  
9  
10  
11  
12  
13

### 14 15 16 17 **Additional analyses**

18 To ensure the quality of this review, studies not reporting blinding will be excluded prior to data  
19 synthesis because blinding plays a vital important role in the randomized controlled trial. We will  
20 assess heterogeneity quantitatively using the I<sup>2</sup> statistic, and if an I<sup>2</sup> value is greater than 50%, then  
21 we will explore the source of heterogeneity. We will initially perform sensitivity analysis by  
22 excluding trials rated as having a high risk of bias. Additionally, meta-regression or subgroup  
23 analysis will be used to explore possible sources of heterogeneity if the number of included trials  
24 is sufficient. For network meta-regression, we will use a random effects network meta-regression  
25 model to examine potential factors.  
26  
27  
28  
29  
30  
31  
32  
33  
34

### 35 36 **Discussion**

37 To the best of our knowledge, no network meta-analyses comparing the use of antiepileptic drugs  
38 for treatment of classical TN have been conducted to date. Previous systematic reviews have  
39 compared only a single drug to other types of drug or therapy.<sup>20,24-28</sup> This makes it difficult to  
40 obtain a clear understanding of the effectiveness of the various different conservative treatments  
41 for this disorder. Network meta-analysis can be used to perform indirect comparisons and allows  
42 parameters for direct and indirect comparisons to be synthesized. To ensure the quantity and  
43 quality of the potentially included RCTs, we will perform an extensive literature search and  
44 predefine rigorous inclusion criteria. Besides, we will assess the quality of evidence with the  
45 GRADE framework. Although a ranking of the included interventions will be generated, with the  
46 exception of findings, the quality of evidence should also be considered. We hope that the results  
47 of this review help clinicians make more accurate treatment decisions and promote additional  
48 research into conservative treatments for classical TN.  
49  
50  
51  
52  
53  
54  
55  
56  
57  
58  
59  
60



1  
2  
3  
4  
5  
6  
7  
8  
9  
10  
11  
12  
13  
14  
15  
16  
17  
18  
19  
20  
21  
22  
23  
24  
25  
26  
27  
28  
29  
30  
31  
32  
33  
34  
35  
36  
37  
38  
39  
40  
41  
42  
43  
44  
45  
46  
47  
48  
49  
50  
51  
52  
53  
54  
55  
56  
57  
58  
59  
60

For peer review only

**Amendments**

If it is necessary to update this protocol, we will update this protocol in the future. We will submit the original protocol, final protocol and summary of changes as a supplement.

**Authors' contributions**

ZQ, SX, and ZM conceived of the study. JT and SX developed the search strategies. ZQ, JT and SX wrote the first draft. TAF and ZL revised the draft. SX and ZM will independently screen potential studies and extract data from the included studies. JW, JK, JT and YL will assess the risk of bias and summarize the evidence. ZM, SX, JK and ZL will address the missing data, if any. ZQ and JT will perform the statistical analysis. ZL and JT will arbitrate in cases of disagreement and ensure the absence of errors. All authors approve the publication of this protocol.

**Ethics and dissemination**

This protocol will not disseminate any private patient data. The results of this review will be disseminated through peer-reviewed publication.

**Competing interests:** None.

**Funding:** None.

**Reference**

1. Headache Classification Committee of the International Headache Society (IHS). The International Classification of Headache Disorders, 3rd edition (beta version). *Cephalalgia*. 2013;33:629-808.
2. Zakrzewska JM, Linskey ME. Trigeminal neuralgia. *BMJ*. 2015;350:h1238
3. Meller D, Obermann M, Yoon MS, Poitz F, Hansen N, Slomke MA. Prevalence of trigeminal neuralgia and persistent idiopathic facial pain: a population-based study. *Cephalalgia*. 2011;31:1542-1548.
4. MacDonald BK, Cockerell OC, Sander JW, Shorvon SD. The incidence and lifetime prevalence of neurological disorders in a prospective community-based study in the UK. *Brain*. 2000;123:665-676.
5. Devor M, Amir R, Rappaport ZH. Pathophysiology of trigeminal neuralgia: the ignition hypothesis. *Clin J Pain*. 2002;18:4-13.
6. Danielle DD, Hodaie M, Davis KD. Structural magnetic resonance imaging can identify trigeminal system abnormalities in classical trigeminal neuralgia. *Front Neuroanat*. 2016;10:95.
7. Katusic S, Beard CM, Bergstralh E, Kurland LT. Incidence and clinical features of trigeminal neuralgia, Rochester, Minnesota, 1945-1984. *Ann Neurol*. 1990;27:89-95.
8. Gronseth G, Cruccu G, Alksne J, et al. Practice parameter: the diagnostic evaluation and treatment of trigeminal neuralgia (an evidence-based review): report of the Quality Standards Subcommittee of the American Academy of Neurology and the European Federation of Neurological Societies. *Neurology*. 2008;71:1183-1190.
9. Campbell FG, Graham JG, Zilkha KJ. Clinical trial of carbamazepine (tegretol) in trigeminal neuralgia. *J Neurol Neurosurg Psychiatry*. 1966;29:265-267.
10. Fromm GH, Terrence CF, Chattha AS. Baclofen in the treatment of trigeminal neuralgia: double-blind study and long-term follow-up. *Ann Neurol*. 1984;15:240-244.
11. Zakrzewska JM, Lopez BC, Kim SE, Coakham HB. Patient reports of satisfaction after microvascular decompression and partial sensory rhizotomy for trigeminal neuralgia. *Neurosurgery*. 2005;56:1304-1311.
12. A Nanda, V Javalkar, S Zhang, O Ahmed. Long term efficacy and patient satisfaction of microvascular decompression and gamma knife radiosurgery for trigeminal neuralgia. *Journal of Clinical Neuroscience* 2015;22:818-822.
13. Linskey ME, Ratanatharathorn V, Peñagaricano J. A prospective cohort study of microvascular decompression and Gamma Knife surgery in patients with trigeminal. *J Neurosurg*. 2008;109 Suppl:160-172.
14. Zakrzewska JM, Thomas DG. Patient's assessment of outcome after three surgical procedures for the management of trigeminal neuralgia. *Acta Neurochir (Wien)*. 1993;122:225-230.
15. Sindrup SH, Jensen TS. Pharmacotherapy of trigeminal neuralgia. *Clin J Pain* 2002;18:22-27.
16. Wiffen PJ, McQuay HJ, Moore RA. Carbamazepine for acute and chronic pain. *Cochrane*

- 1  
2  
3 Database Syst Rev. 2005;(3):CD005451.
- 4 17. Zakrzewska JM, Patsalos PN. Long-term cohort study comparing medical (oxcarbazepine) and  
5 surgical management of intractable trigeminal neuralgia. *Pain*. 2002;95:259-66
- 6 18. Zakrzewska JM, Chaudhry Z, Nurmikko TJ, et al. Lamotrigine (Lamictal) in refractory  
7 trigeminal neuralgia: results from a double-blind placebo controlled crossover trial. *Pain*.  
8 1997;73:223-230.
- 9 19. Court JE, Kase CS. Treatment of tic douloureux with a new anticonvulsant (clonazepam). *J*  
10 *Neurol Neurosurg Psychiatry*. 1976;39:297-299.
- 11 20. Yuan M, Zhou HY, Xiao ZL, et al. Efficacy and Safety of Gabapentin vs. Carbamazepine in  
12 the Treatment of Trigeminal Neuralgia: A Meta-Analysis. *Pain Pract*. 2016;16:1083-1091
- 13 21. Obermann M, Yoon MS, Sensen K, Maschke M, Diener HC, Katsarava Z. Efficacy of  
14 pregabalin in the treatment of trigeminal neuralgia. *Cephalalgia*. 2008;28:174-181.
- 15 22. Peiris JB, Perera GL, Devendra SV, Lionel ND. Sodium valproate in trigeminal neuralgia.  
16 *Med J Aust*. 1980;2:278.
- 17 23. Zakrzewska JM, Linskey ME. Trigeminal neuralgia. *Clin Evid*. 2014;10:1207
- 18 24. McQuay H, Carroll D, Jadad AR, et al. Anticonvulsant drugs for management of pain: a  
19 systematic review. *BMJ*. 1995;311:1047-1052.
- 20 25. Wiffen PJ, Rees J. Lamotrigine for acute and chronic pain. *Cochrane Database Syst Rev*.  
21 2007;(2):CD006044.
- 22 26. Wiffen PJ, McQuay HJ, Rees J, Moore RA. Gabapentin for acute and chronic pain. *Cochrane*  
23 *Database Syst Rev*. 2005;(3):CD005452.
- 24 27. Wiffen PJ, Derry S, Moore RA, McQuay HJ. Carbamazepine for acute and chronic pain in  
25 adults. *Cochrane Database Syst Rev*. 2011;(1):CD005451.
- 26 28. Moore RA, Straube S, Wiffen PJ, Derry S, McQuay HJ. Pregabalin for acute and chronic pain  
27 in adults. *Cochrane Database Syst Rev*. 2009;(3):CD007076.
- 28 29. Caldwell DM, Ades AE, Higgins JP. Simultaneous comparison of multiple treatments:  
29 combining direct and indirect evidence. *BMJ*. 2005;331:897-900.
- 30 30. Cipriani A, Higgins JP, Geddes JR, Salanti G. Conceptual and technical challenges in network  
31 meta-analysis. *Ann Intern Med*. 2013;159:130-137.
- 32 31. Cipriani A, Furukawa TA, Salanti G, et al. Comparative efficacy and acceptability of 12  
33 new-generation antidepressants: a multiple-treatments meta-analysis. *Lancet*. 2009;373:746-758.
- 34 32. Shamseer L, Moher D, Clarke M, et al. Preferred reporting items for systematic review and  
35 meta-analysis protocols (PRISMA-P) 2015: elaboration and explanation. *BMJ*. 2015;349:g7647.
- 36 33. Hutton B, Salanti G, Caldwell DM, et al. The PRISMA Extension Statement for Reporting of  
37 Systematic Reviews Incorporating Network Meta-analyses of Health Care Interventions: Checklist  
38 and Explanations. *Ann Intern Med*. 2015;162:777-784.
- 39 34. Merskey H, Bogduk N. Classification of chronic pain. Descriptions of chronic pain syndromes  
40 and definitions of pain terms, IASP Press, Seattle 1994, pp. 59-71.
- 41  
42  
43  
44  
45  
46  
47  
48  
49  
50  
51  
52  
53  
54  
55  
56  
57  
58  
59  
60

- 1
- 2
- 3 35. Zakrzewska JM. Diagnosis and differential diagnosis of trigeminal neuralgia. *Clin J Pain.* 2002;18:14-21.
- 4
- 5
- 6 36. Dworkin RH, Turk DC, Farrar JT, et al. Core outcome measures for chronic pain clinical trials: IMMPACT recommendations. *Pain.* 2005;113:9-19.
- 7
- 8
- 9 37. Ware JE Jr, Sherbourne CD. The MOS 36-item short-form health survey (SF-36). I. Conceptual framework and item selection. *Med Care.* 1992;30:473-483.
- 10
- 11
- 12 38. Qin Z, Li B, Wu J, et al. Acupuncture for chronic diarrhea in adults: protocol for a systematic review. *Medicine (Baltimore).* 2017;94:e5952.
- 13
- 14
- 15 39. Higgins JPT, Altman DG, Sterne JAC (editors). Chapter 8: Assessing risk of bias in included studies. In: Higgins JPT, Green S(editors). *Cochrane Handbook for Systematic Reviews of Intervention Version 5.1.0* [updated March 2011]. The Cochrane Collaboration, 2011. Available from [www.cochrane-handbook.org](http://www.cochrane-handbook.org).
- 16
- 17
- 18
- 19
- 20 40. Salanti G, Del Giovane C, Chaimani A, et al. Evaluating the quality of evidence from a network meta-analysis. *PLoS ONE.* 2014;9:e99682.
- 21
- 22
- 23 41. Furukawa TA, Cipriani A, Barbui C, Brambilla P, Watanabe N. Imputing response rates from means and standard deviations in meta-analyses. *Int Clin Psychopharmacol.* 2005;20:49-52.
- 24
- 25
- 26 42. Lin L, Zhang J, Hodges J, Chu H. Performing arm-based network meta-analysis in R with the pnetmeta package. *Journal of Statistical Software.* 2017;doi: 10.18637/jss.v080.i05
- 27
- 28
- 29 43. Lin L, Zhang J, Chu H. pnetmeta: Methods for patient-centered network meta-analysis. 2016. R package version 2.4 <http://CRAN.R-project.org/package=pnetmeta>
- 30
- 31
- 32 44. Zhang J, Carlin B.P, Neaton J.D, et al. Network meta-analysis of randomized clinical trials: Reporting the proper summaries. *Clinical Trials.* 2014;11:246-262
- 33
- 34
- 35 45. Higgins JP, Thompson SG, Deeks JJ, Altman DG. Measuring inconsistency in meta-analyses. *BMJ.* 2003;327:557-560.
- 36
- 37
- 38 46. Baker SG, Kramer BS. The transitive fallacy for randomized trials: if A bests B and B bests C in separate trials, is A better than C? *BMC Med Res Methodol.* 2002;2:13.
- 39
- 40
- 41 47. White IR, Barrett JK, Jackson D, et al. Consistency and inconsistency in network meta-analysis: model estimation using multivariate meta-regression. *Res Synth Methods.* 2012;3:111-125
- 42
- 43
- 44
- 45 48. Higgins JPT, Jackson D, Barrett JL, et al. Consistency and inconsistency in network meta-analysis: concepts and models for multi-arm studies. *Res Synth Methods.* 2012;3:98-110
- 46
- 47
- 48 49. Dias S, Welton NJ, Caldwell DM, et al. Checking consistency in mixed treatment comparison meta-analysis. *Stat Med.* 2010;29:932-944
- 49
- 50
- 51 50. Lu G, Ades AE. Assessing evidence inconsistency in mixed treatment comparisons. *J Am Stat Assoc.* 2006;101:447-459.
- 52
- 53
- 54 51. Veroniki AA, Vasiliadis HS, Higgins JP, Salanti G. Evaluation of inconsistency in networks of interventions. *Int J Epidemiol.* 2013;42:332-345.
- 55
- 56
- 57
- 58
- 59
- 60

1  
2  
3 **Figure legends of figure:**  
4

5 Figure 1. Network plot of all possible direct comparisons between the eligible interventions.  
6

7 Figure 2. PRISMA flow chart.  
8  
9  
10  
11  
12  
13  
14  
15  
16  
17  
18  
19  
20  
21  
22  
23  
24  
25  
26  
27  
28  
29  
30  
31  
32  
33  
34  
35  
36  
37  
38  
39  
40  
41  
42  
43  
44  
45  
46  
47  
48  
49  
50  
51  
52  
53  
54  
55  
56  
57  
58  
59  
60

For peer review only

1  
2  
3  
4  
5  
6  
7  
8  
9  
10  
11  
12  
13  
14  
15  
16  
17  
18  
19  
20  
21  
22  
23  
24  
25  
26  
27  
28  
29  
30  
31  
32  
33  
34  
35  
36  
37  
38  
39  
40  
41  
42  
43  
44  
45  
46  
47  
48  
49  
50  
51  
52  
53  
54  
55  
56  
57  
58  
59  
60



Network plot of all possible direct comparisons between the eligible interventions.

140x101mm (300 x 300 DPI)

Review only



PRISMA flow chart

192x219mm (300 x 300 DPI)



**PRISMA-P (Preferred Reporting Items for Systematic review and Meta-Analysis Protocols) 2015 checklist: recommended items to address in a systematic review protocol\***

| Section and topic                 | Item No | Checklist item                                                                                                                                                                                                                                       |
|-----------------------------------|---------|------------------------------------------------------------------------------------------------------------------------------------------------------------------------------------------------------------------------------------------------------|
| <b>ADMINISTRATIVE INFORMATION</b> |         |                                                                                                                                                                                                                                                      |
| Title:                            |         |                                                                                                                                                                                                                                                      |
| Identification                    | 1a      | Identify the report as a protocol of a systematic review <a href="#">Page 1</a>                                                                                                                                                                      |
| Update                            | 1b      | If the protocol is for an update of a previous systematic review, identify as such <a href="#">NA</a>                                                                                                                                                |
| Registration                      | 2       | If registered, provide the name of the registry (such as PROSPERO) and registration number <a href="#">Page 2</a>                                                                                                                                    |
| Authors:                          |         |                                                                                                                                                                                                                                                      |
| Contact                           | 3a      | Provide name, institutional affiliation, e-mail address of all protocol authors; provide physical mailing address of corresponding author <a href="#">Page 1</a>                                                                                     |
| Contributions                     | 3b      | Describe contributions of protocol authors and identify the guarantor of the review <a href="#">Page 11</a>                                                                                                                                          |
| Amendments                        | 4       | If the protocol represents an amendment of a previously completed or published protocol, identify as such and list changes; otherwise, state plan for documenting important protocol amendments <a href="#">Page 11</a>                              |
| Support:                          |         |                                                                                                                                                                                                                                                      |
| Sources                           | 5a      | Indicate sources of financial or other support for the review <a href="#">Page 11</a>                                                                                                                                                                |
| Sponsor                           | 5b      | Provide name for the review funder and/or sponsor <a href="#">Page 11</a>                                                                                                                                                                            |
| Role of sponsor or funder         | 5c      | Describe roles of funder(s), sponsor(s), and/or institution(s), if any, in developing the protocol <a href="#">Page 11</a>                                                                                                                           |
| <b>INTRODUCTION</b>               |         |                                                                                                                                                                                                                                                      |
| Rationale                         | 6       | Describe the rationale for the review in the context of what is already known <a href="#">Page 3</a>                                                                                                                                                 |
| Objectives                        | 7       | Provide an explicit statement of the question(s) the review will address with reference to participants, interventions, comparators, and outcomes (PICO) <a href="#">Page 4</a>                                                                      |
| <b>METHODS</b>                    |         |                                                                                                                                                                                                                                                      |
| Eligibility criteria              | 8       | Specify the study characteristics (such as PICO, study design, setting, time frame) and report characteristics (such as years considered, language, publication status) to be used as criteria for eligibility for the review <a href="#">Page 4</a> |
| Information sources               | 9       | Describe all intended information sources (such as electronic databases, contact with study authors, trial registers or other grey literature sources) with planned dates of coverage <a href="#">Page 5</a>                                         |
| Search strategy                   | 10      | Present draft of search strategy to be used for at least one electronic database, including planned limits, such that it could be repeated <a href="#">Page 6</a>                                                                                    |
| Study records:                    |         |                                                                                                                                                                                                                                                      |
| Data management                   | 11a     | Describe the mechanism(s) that will be used to manage records and data throughout the review <a href="#">Page 6-7</a>                                                                                                                                |

|    |                                    |     |                                                                                                                                                                                                                                                                         |
|----|------------------------------------|-----|-------------------------------------------------------------------------------------------------------------------------------------------------------------------------------------------------------------------------------------------------------------------------|
| 1  |                                    |     |                                                                                                                                                                                                                                                                         |
| 2  |                                    |     |                                                                                                                                                                                                                                                                         |
| 3  |                                    |     |                                                                                                                                                                                                                                                                         |
| 4  | Selection process                  | 11b | State the process that will be used for selecting studies (such as two independent reviewers) through each phase of the review (that is, screening, eligibility and inclusion in meta-analysis) <a href="#">Page 6-7</a>                                                |
| 5  | Data collection process            | 11c | Describe planned method of extracting data from reports (such as piloting forms, done independently, in duplicate), any processes for obtaining and confirming data from investigators <a href="#">Page 6-7</a>                                                         |
| 6  |                                    |     |                                                                                                                                                                                                                                                                         |
| 7  | Data items                         | 12  | List and define all variables for which data will be sought (such as PICO items, funding sources), any pre-planned data assumptions and simplifications <a href="#">Page 6-7</a>                                                                                        |
| 8  |                                    |     |                                                                                                                                                                                                                                                                         |
| 9  |                                    |     |                                                                                                                                                                                                                                                                         |
| 10 | Outcomes and prioritization        | 13  | List and define all outcomes for which data will be sought, including prioritization of main and additional outcomes, with rationale <a href="#">Page 5-6</a>                                                                                                           |
| 11 |                                    |     |                                                                                                                                                                                                                                                                         |
| 12 | Risk of bias in individual studies | 14  | Describe anticipated methods for assessing risk of bias of individual studies, including whether this will be done at the outcome or study level, or both; state how this information will be used in data synthesis <a href="#">Page 7</a>                             |
| 13 |                                    |     |                                                                                                                                                                                                                                                                         |
| 14 | Data synthesis                     | 15a | Describe criteria under which study data will be quantitatively synthesised <a href="#">Page 7-8</a>                                                                                                                                                                    |
| 15 |                                    | 15b | If data are appropriate for quantitative synthesis, describe planned summary measures, methods of handling data and methods of combining data from studies, including any planned exploration of consistency (such as $I^2$ , Kendall's $\tau$ ) <a href="#">Page 8</a> |
| 16 |                                    | 15c | Describe any proposed additional analyses (such as sensitivity or subgroup analyses, meta-regression) <a href="#">Page 9-10</a>                                                                                                                                         |
| 17 |                                    | 15d | If quantitative synthesis is not appropriate, describe the type of summary planned <a href="#">Page 9-10</a>                                                                                                                                                            |
| 18 |                                    |     |                                                                                                                                                                                                                                                                         |
| 19 | Meta-bias(es)                      | 16  | Specify any planned assessment of meta-bias(es) (such as publication bias across studies, selective reporting within studies) <a href="#">Page 7</a>                                                                                                                    |
| 20 |                                    |     |                                                                                                                                                                                                                                                                         |
| 21 | Confidence in cumulative evidence  | 17  | Describe how the strength of the body of evidence will be assessed (such as GRADE) <a href="#">Page 7</a>                                                                                                                                                               |
| 22 |                                    |     |                                                                                                                                                                                                                                                                         |

**\* It is strongly recommended that this checklist be read in conjunction with the PRISMA-P Explanation and Elaboration (cite when available) for important clarification on the items. Amendments to a review protocol should be tracked and dated. The copyright for PRISMA-P (including checklist) is held by the PRISMA-P Group and is distributed under a Creative Commons Attribution Licence 4.0.**

*From: Shamseer L, Moher D, Clarke M, Ghersi D, Liberati A, Petticrew M, Shekelle P, Stewart L, PRISMA-P Group. Preferred reporting items for systematic review and meta-analysis protocols (PRISMA-P) 2015: elaboration and explanation. BMJ. 2015 Jan 2;349(jan02 1):g7647.*

## PubMed

### Patient

#1 "Trigeminal Neuralgia"[Mesh]

#2 Trigeminal Neuralgia\*[Title/Abstract] OR Trifacial Neuralgia\*[Title/Abstract] OR Fothergill Disease[Title/Abstract] OR Tic Douloureux[Title/Abstract] OR Epileptiform Neuralgia\*[Title/Abstract] OR trigeminus neuralgia[Title/Abstract] OR prosopalgia[Title/Abstract] OR prosoponeuralgia[Title/Abstract] OR trigeminal nerve neuralgia[Title/Abstract] OR trigeminal nerve neuropathy[Title/Abstract] OR trigeminal neuropathy[Title/Abstract] OR trigeminus nerve neuralgia[Title/Abstract] OR trigeminus nerve neuropathy[Title/Abstract]

#3 #1 OR #2

### RCT

#4 "Clinical Trials, Phase II as Topic"[Mesh] OR "Clinical Trials, Phase III as Topic"[Mesh] OR "Clinical Trials, Phase IV as Topic"[Mesh] OR "Controlled Clinical Trials as Topic"[Mesh] OR "Randomized Controlled Trials as Topic"[Mesh] OR "Intention to Treat Analysis"[Mesh] OR "Pragmatic Clinical Trials as Topic"[Mesh] OR "Clinical Trials, Phase II"[Publication Type] OR "Clinical Trials, Phase III"[Publication Type] OR "Clinical Trials, Phase IV"[Publication Type] OR "Controlled Clinical Trials"[Publication Type] OR "Randomized Controlled Trials"[Publication Type] OR "Pragmatic Clinical Trials as Topic"[Publication Type] OR "Single-Blind Method"[Mesh] OR "Double-Blind Method"[Mesh]

#5 random\*[Title/Abstract] OR blind\*[Title/Abstract] OR singleblind\*[Title/Abstract] OR doubleblind\*[Title/Abstract] OR trebleblind\*[Title/Abstract] OR tripleblind\*[Title/Abstract]

#6 #4 OR #5

#7 #3 AND #6

## EMBASE.com

### Patient

#1 'trigeminus neuralgia'/exp

#2 'trigeminal neuralgias':ab,ti OR 'trifacial neuralgias':ab,ti OR 'trigeminal neuralgia':ab,ti OR 'trifacial neuralgia':ab,ti OR 'fothergill disease':ab,ti OR 'tic douloureux':ab,ti OR 'epileptiform neuralgia':ab,ti OR 'epileptiform neuralgias':ab,ti OR 'trigeminus neuralgia':ab,ti OR prosopalgia:ab,ti OR prosoponeuralgia:ab,ti OR 'trigeminal nerve neuralgia':ab,ti OR 'trigeminal nerve neuropathy':ab,ti OR 'rigeminal neuropathy':ab,ti OR 'trigeminus nerve neuralgia':ab,ti OR 'trigeminus nerve neuropathy':ab,ti

#3 #1 OR #2

### RCT

#4 'multicenter study (topic)/exp OR 'phase 2 clinical trial (topic)/exp OR 'phase 3 clinical trial

1  
2  
3  
4 (topic)/exp OR 'phase 4 clinical trial (topic)/exp OR 'controlled clinical trial (topic)/exp OR  
5 'randomized controlled trial (topic)/exp OR 'single blind procedure'/exp OR 'double blind  
6 procedure'/exp  
7

8  
9 #5 random\*:ab,ti OR blind\*:ab,ti OR singleblind\*:ab,ti OR doubleblind\*:ab,ti OR trebleblind\*:ab,ti  
10 OR tripleblind\*:ab,ti

11 #6 #4 OR #5

12 #7 #3 AND #6  
13  
14  
15

## 16 17 **Cochrane Library**

18  
19 #1 MeSH descriptor: [Trigeminal Neuralgia] explode all trees

20  
21 #2 Trigeminal Neuralgia\*:ti,ab,kw or Trifacial Neuralgia\*:ti,ab,kw or Fothergill Disease:ti,ab,kw  
22 or Tic Douloureux:ti,ab,kw or Epileptiform Neuralgia\*:ti,ab,kw or trigeminus neuralgia:ti,ab,kw or  
23 prosopalgia:ti,ab,kw or prosoponeuralgia:ti,ab,kw or trigeminal nerve neuralgia:ti,ab,kw or  
24 trigeminal nerve neuropathy:ti,ab,kw or trigeminal neuropathy:ti,ab,kw or trigeminus nerve  
25 neuralgia:ti,ab,kw or trigeminus nerve neuropathy:ti,ab,kw  
26  
27  
28

29 #3 #1 or #2  
30  
31  
32  
33  
34  
35  
36  
37  
38  
39  
40  
41  
42  
43  
44  
45  
46  
47  
48  
49  
50  
51  
52  
53  
54  
55  
56  
57  
58  
59  
60
